# Supplementary material for: Large-scale mutational analysis identifies UNC93B1 variants that drive TLR-mediated autoimmunity in mice and humans
Source: PubMed Central journal article supplement (PMC11116816; doi:10.1084/jem.20232005), 2024-05-23

# Figure 3A

## Part 1

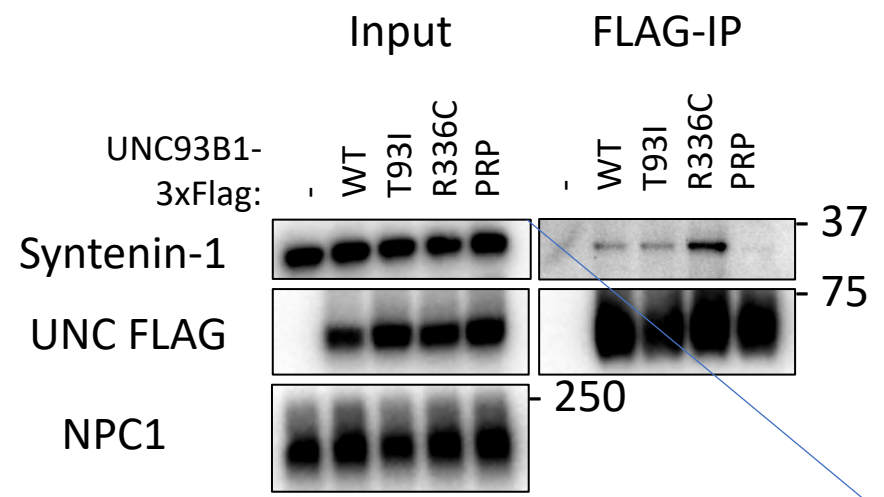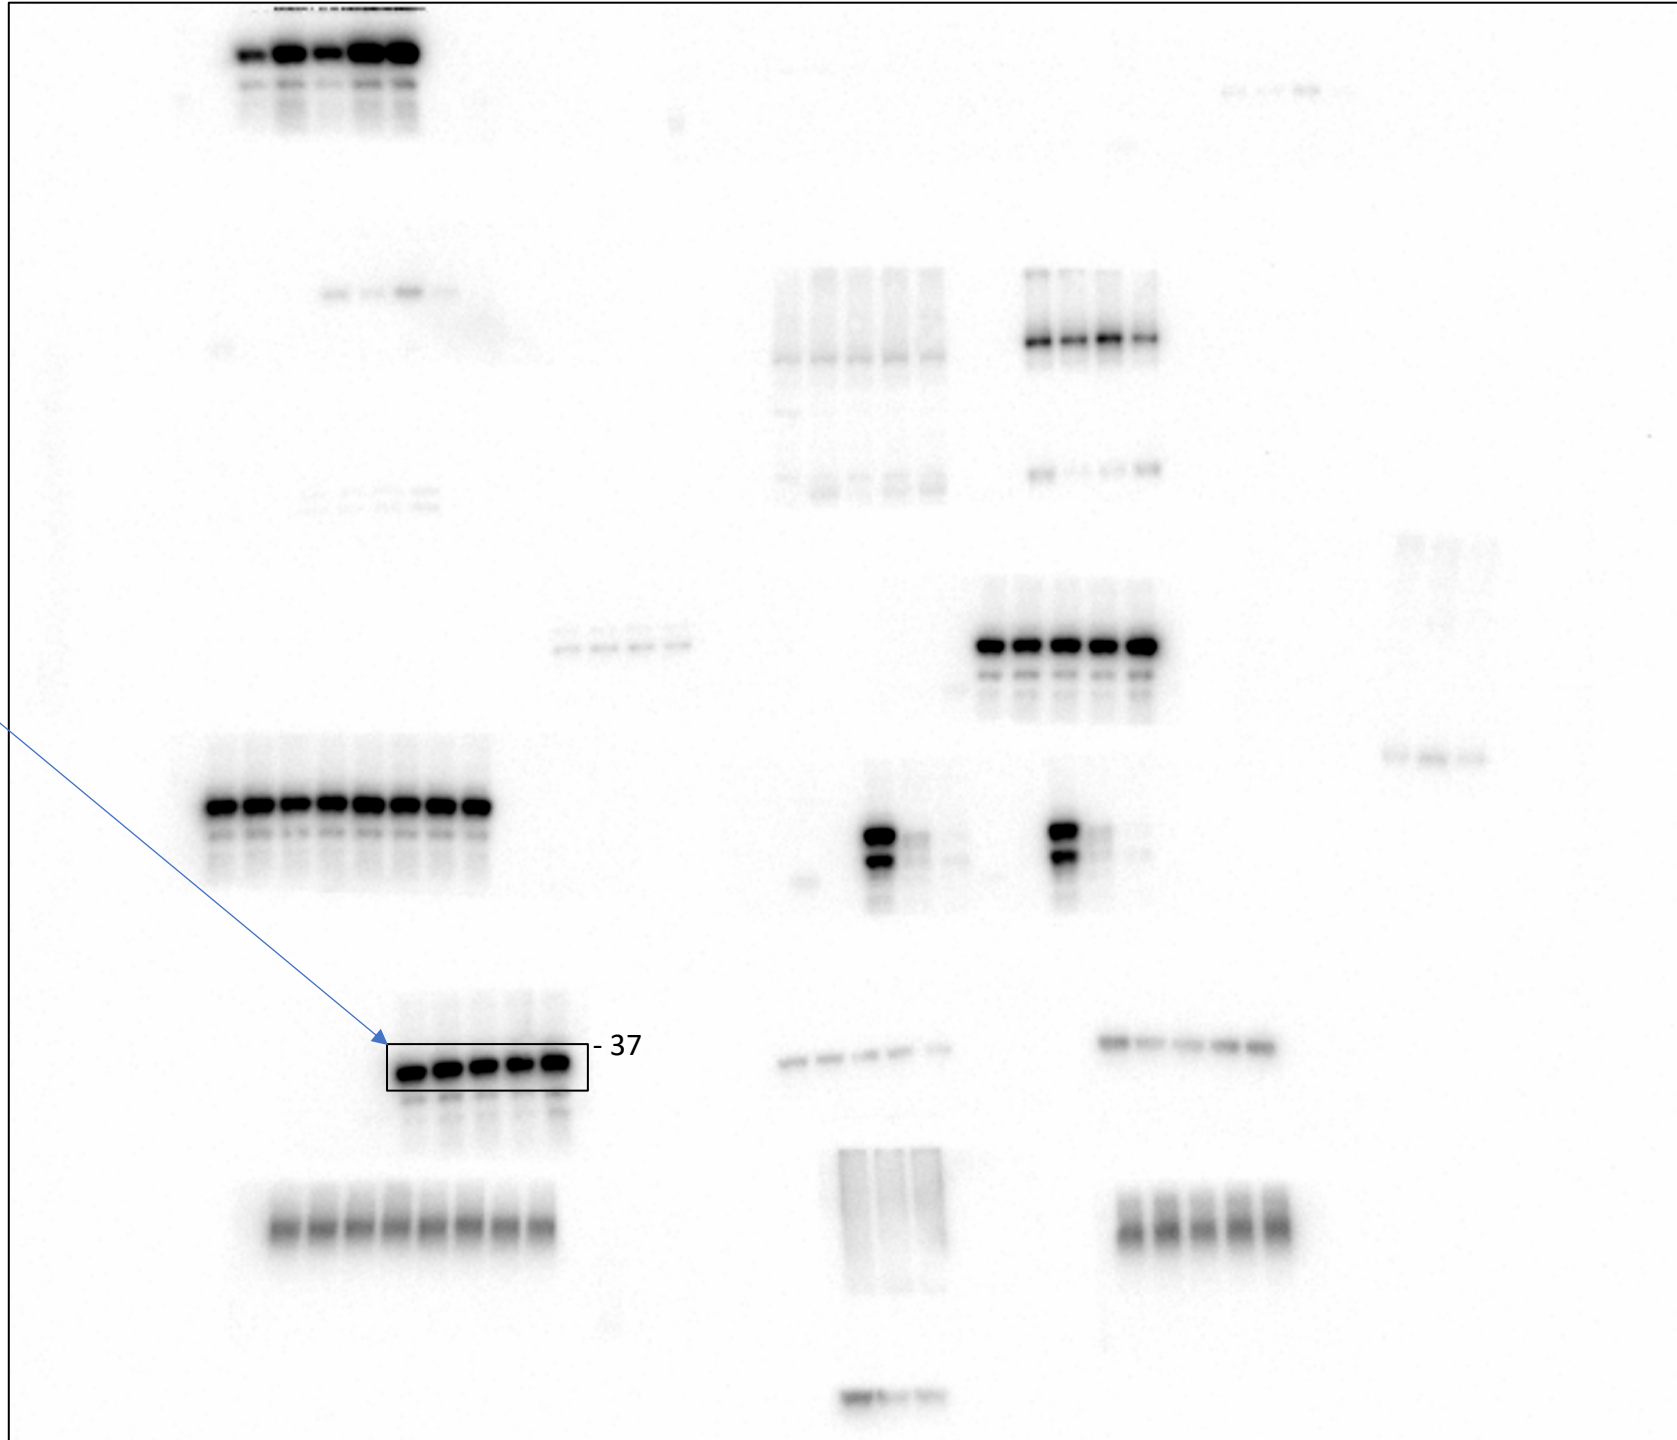

# Figure 3A

## Part 2

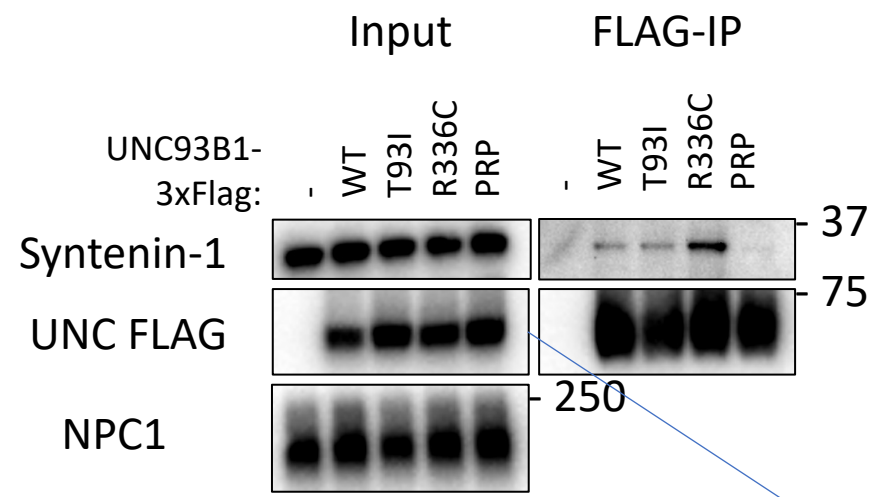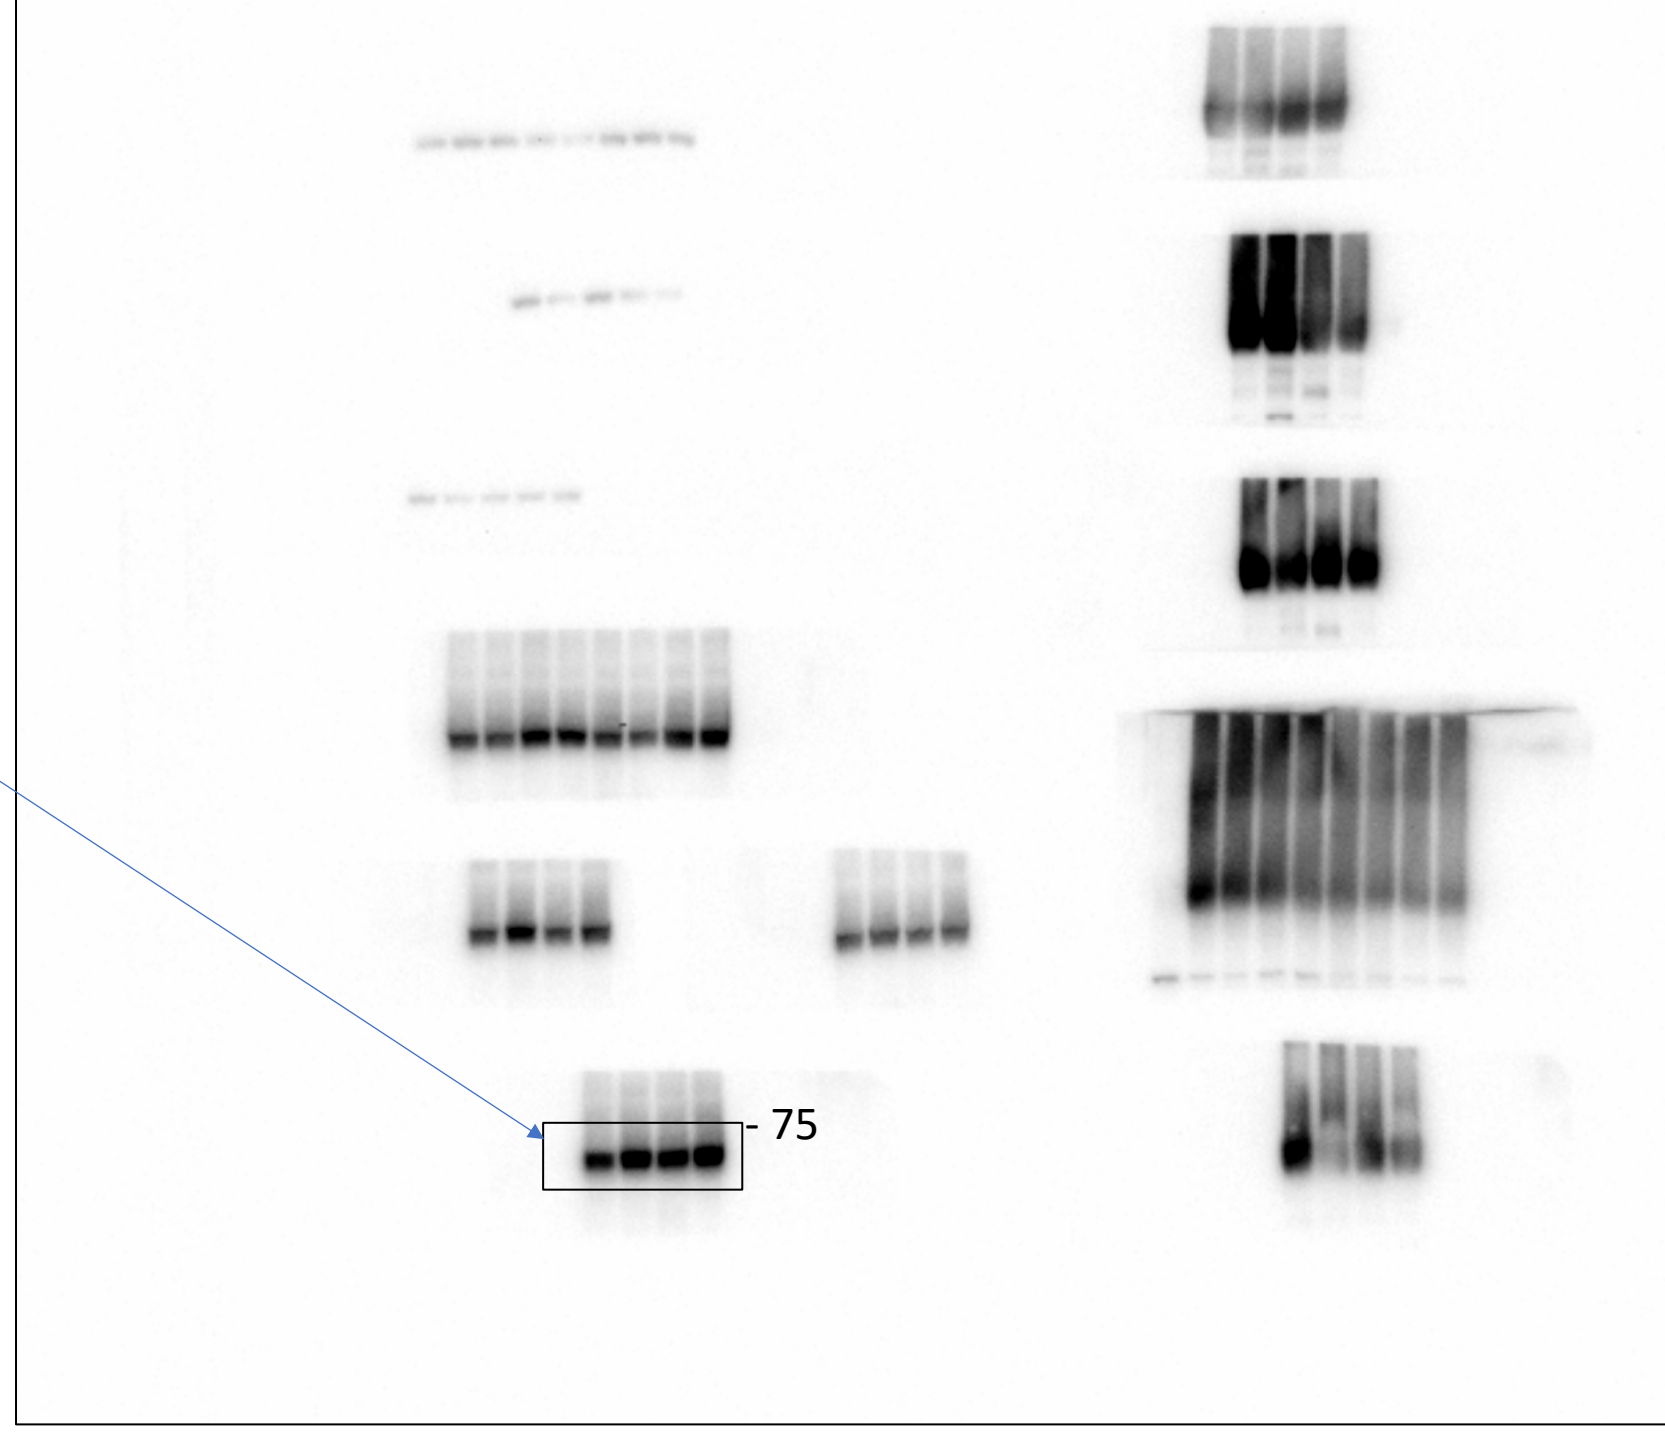

# Figure 3A

## Part 3

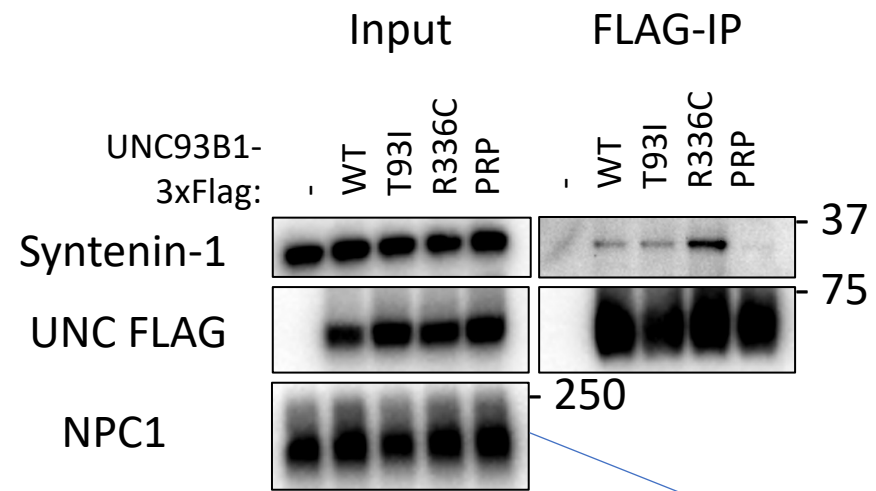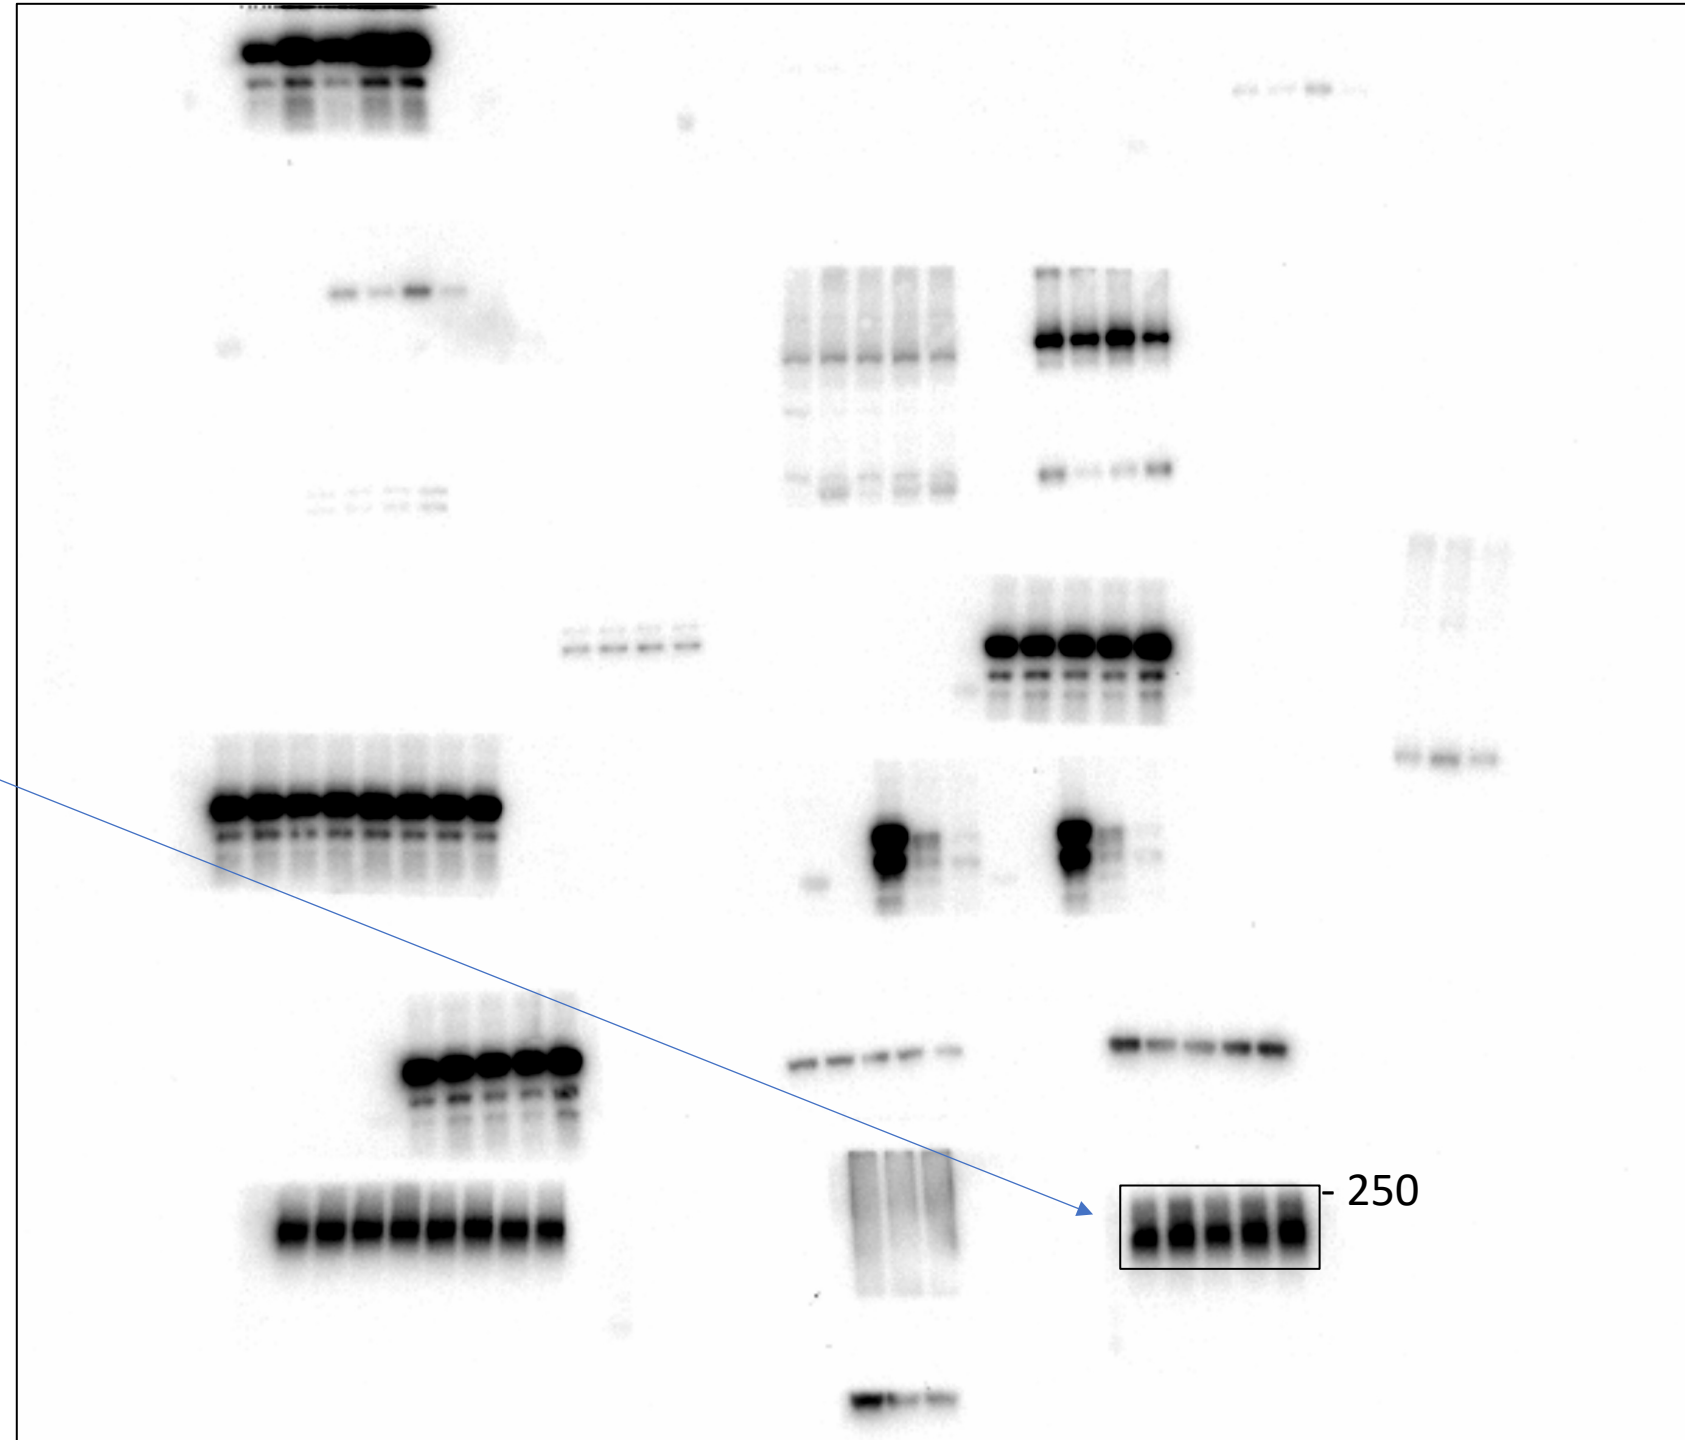

# Figure 3A

## Part 4

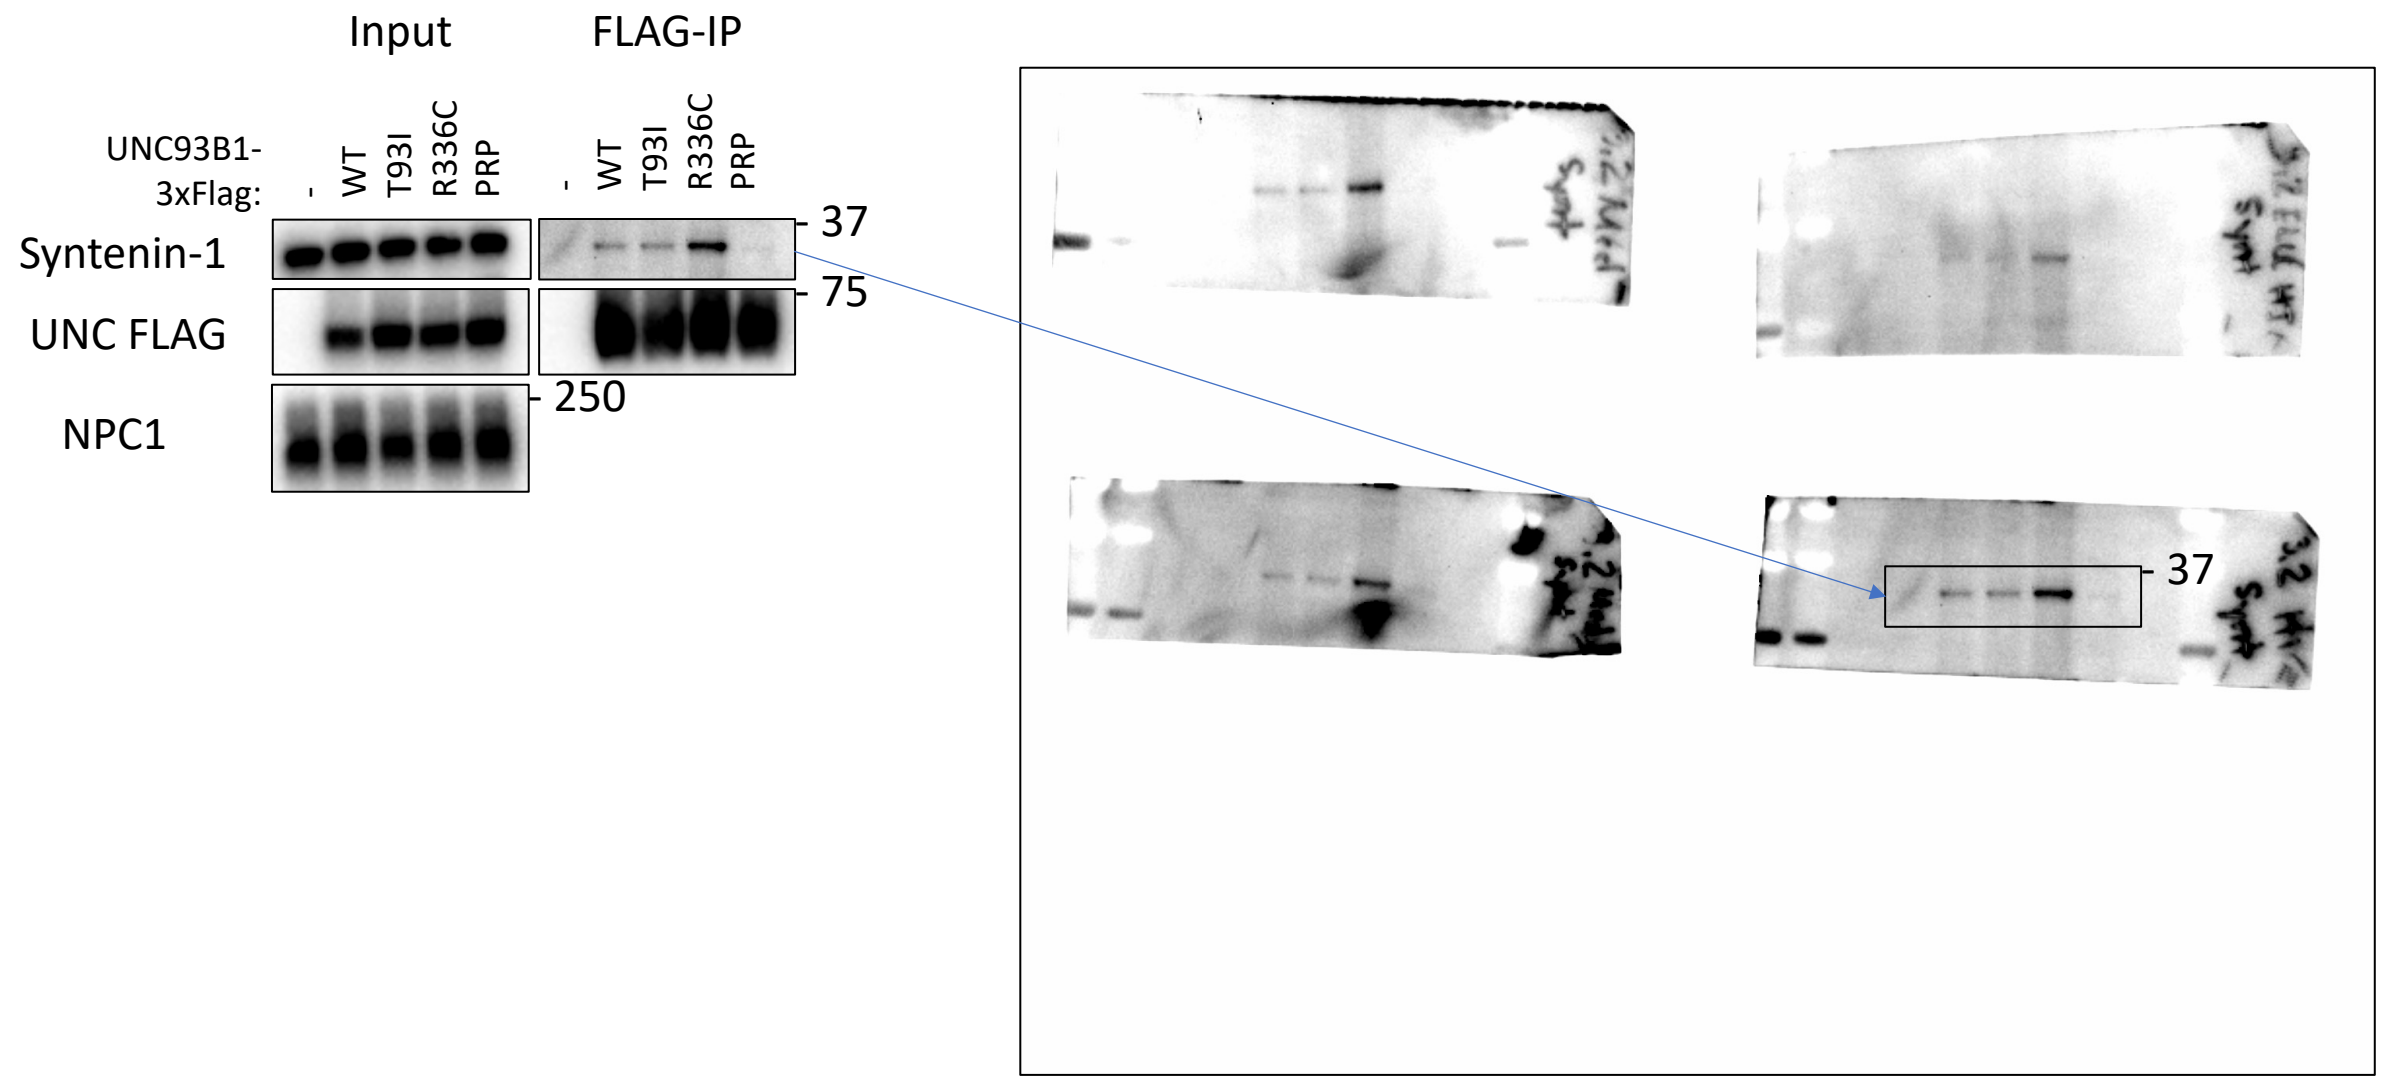

# Figure 3A

## Part 5

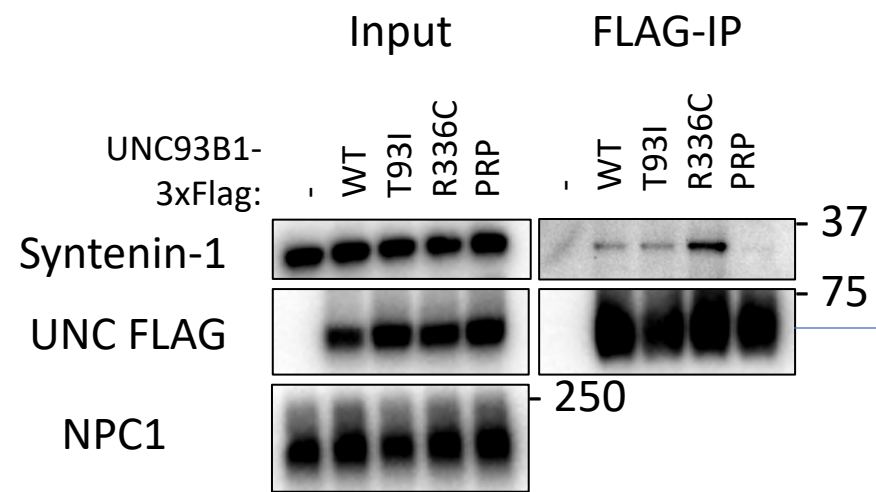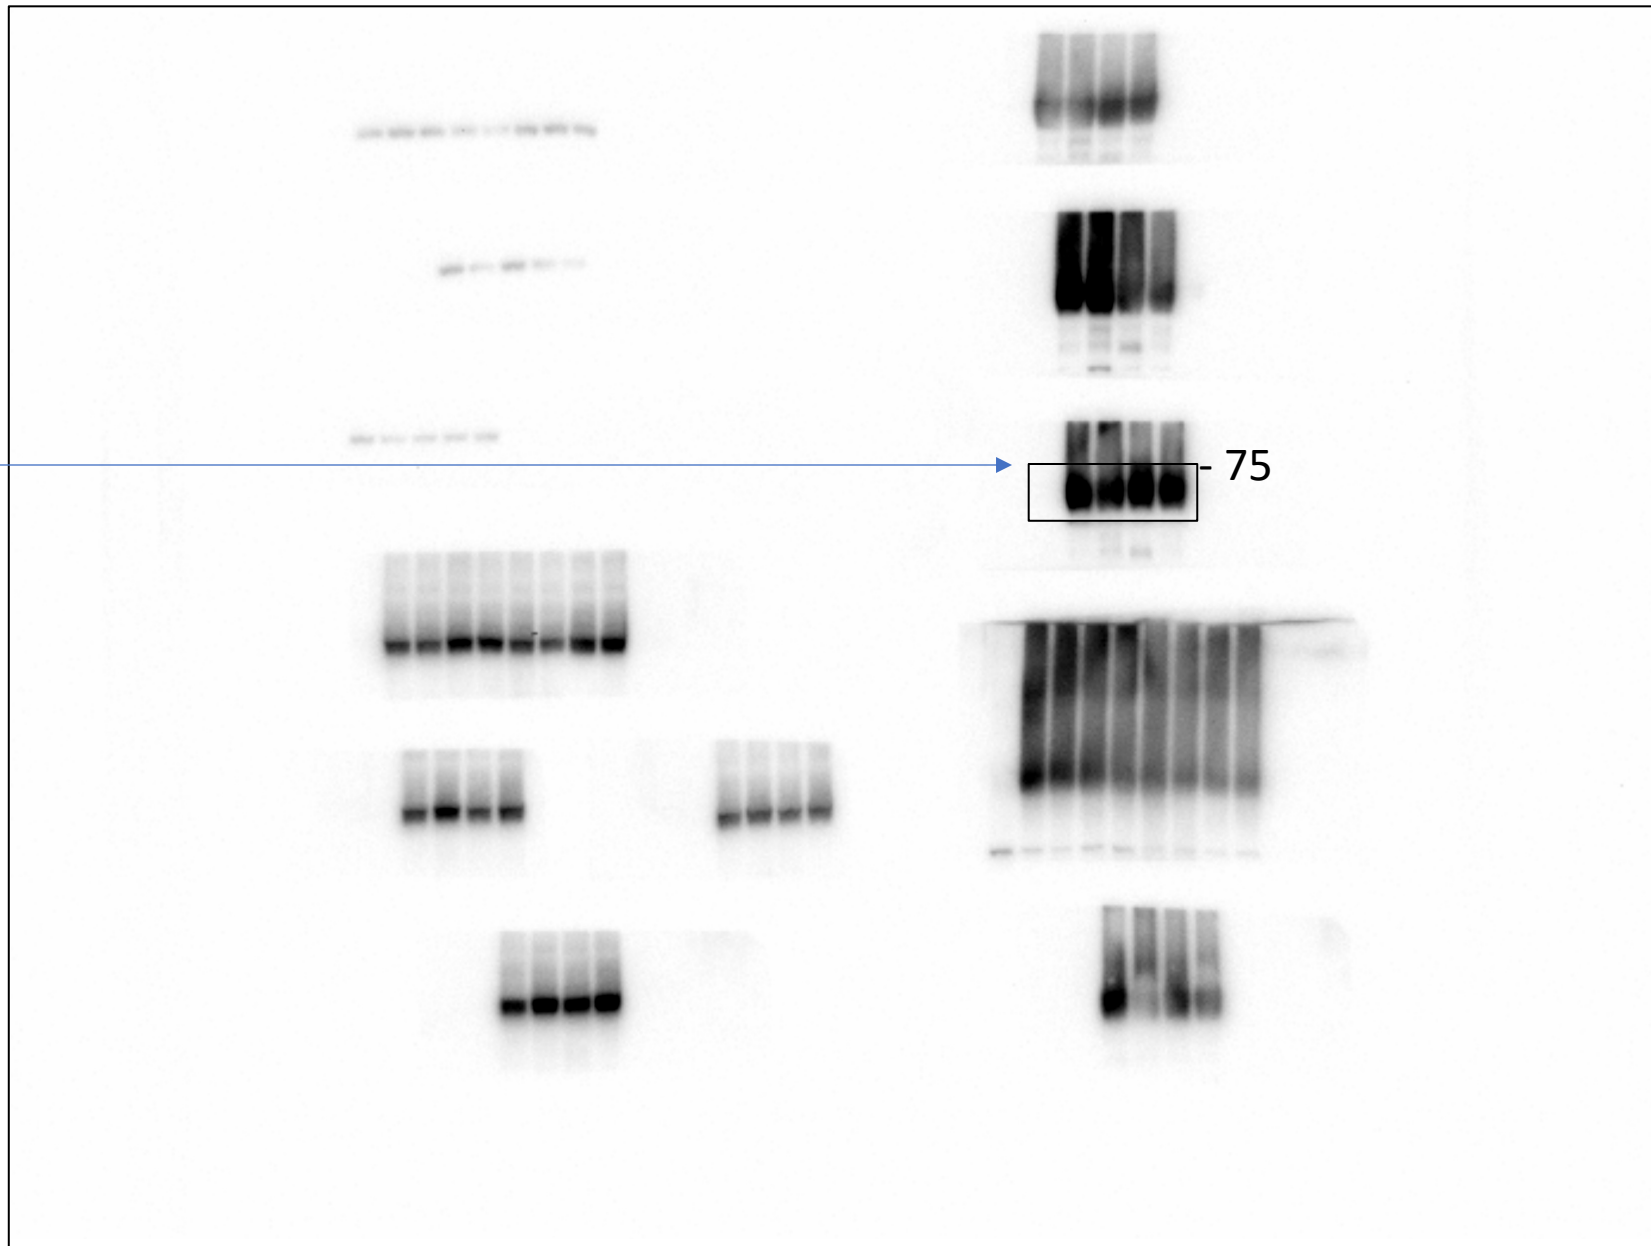

**Figure 3C**  
**Part 1**

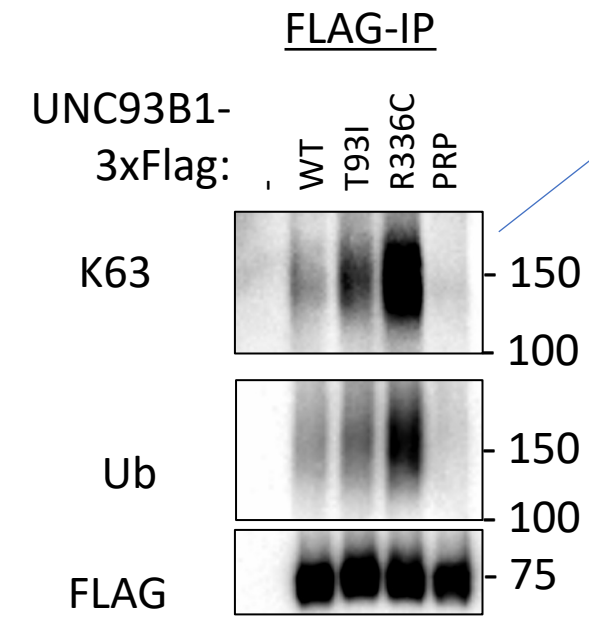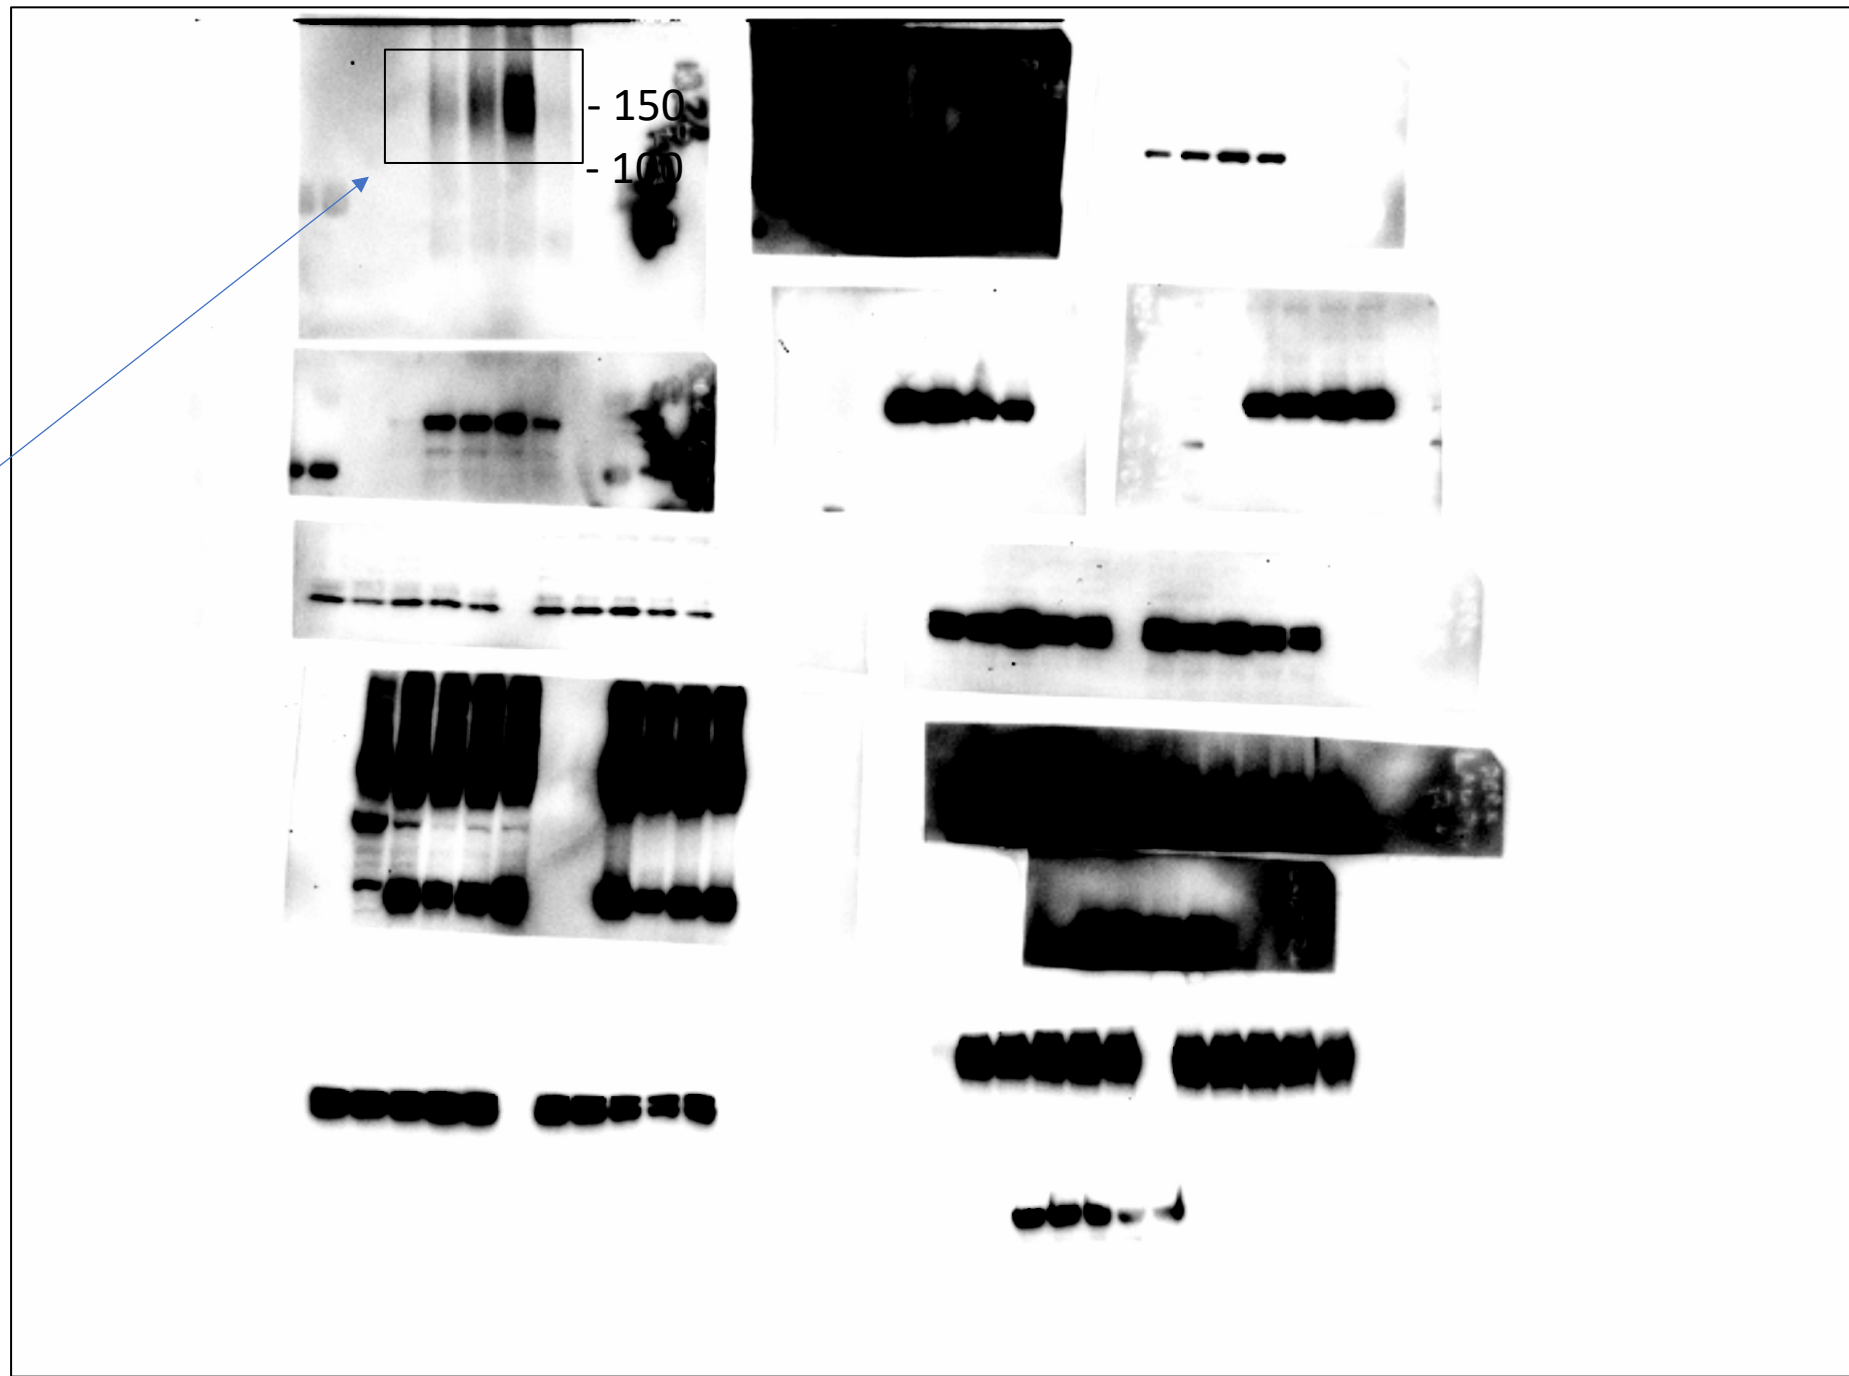

**Figure 3C**  
**Part 2**

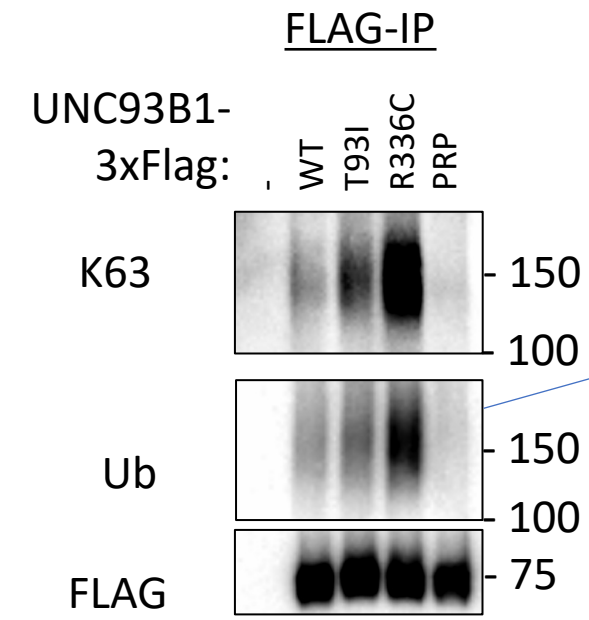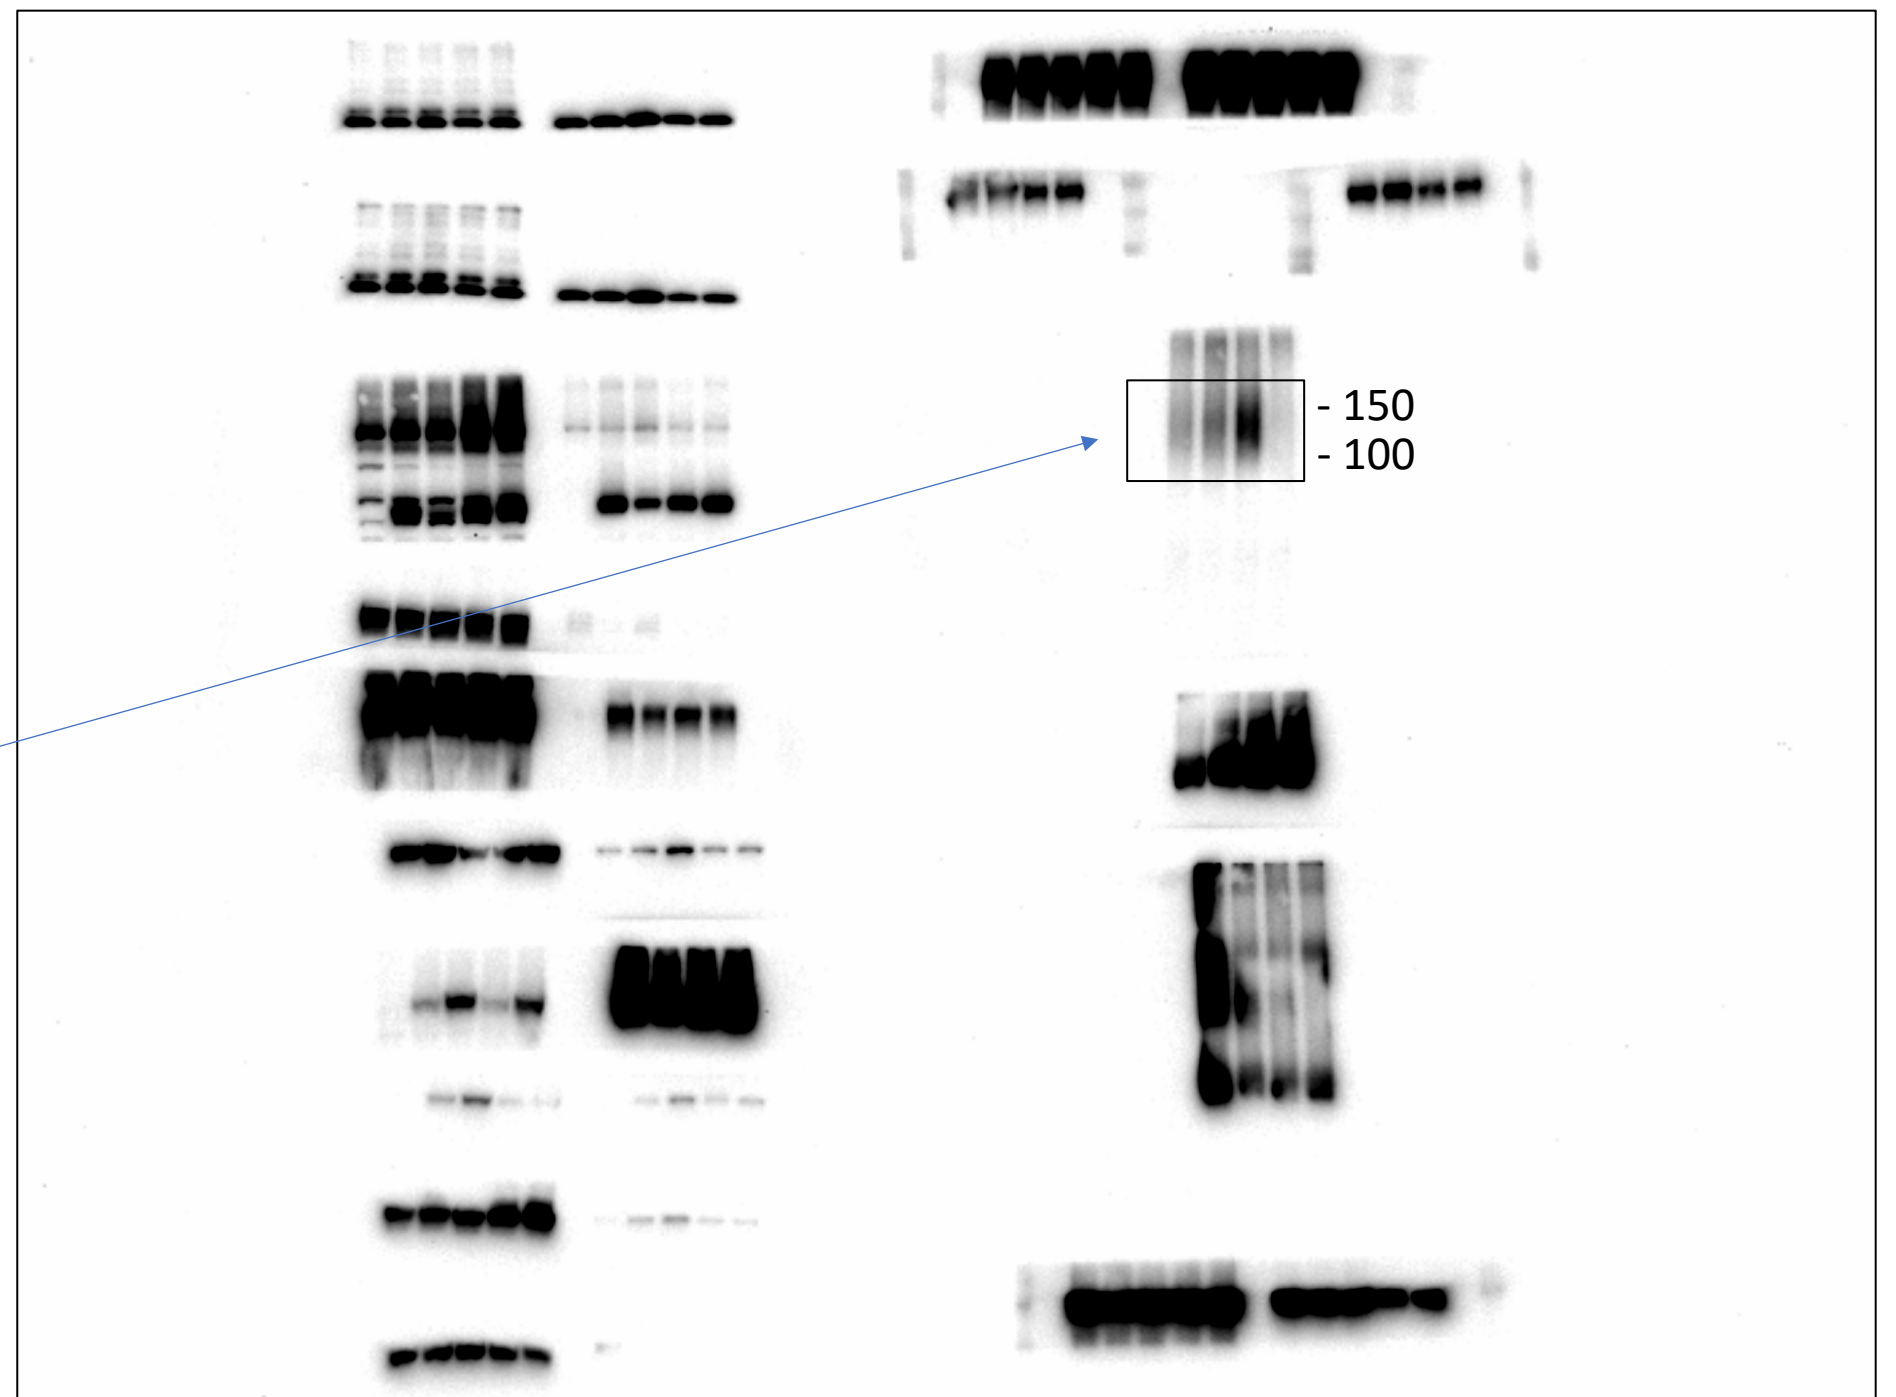

**Figure 3C**  
**Part 3**

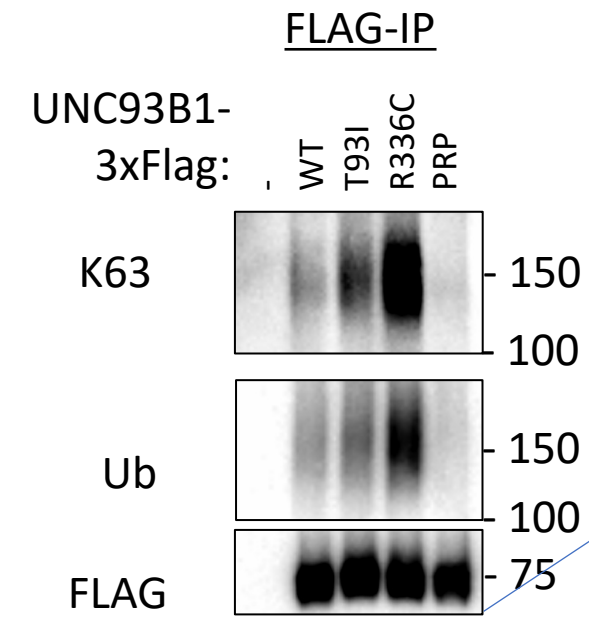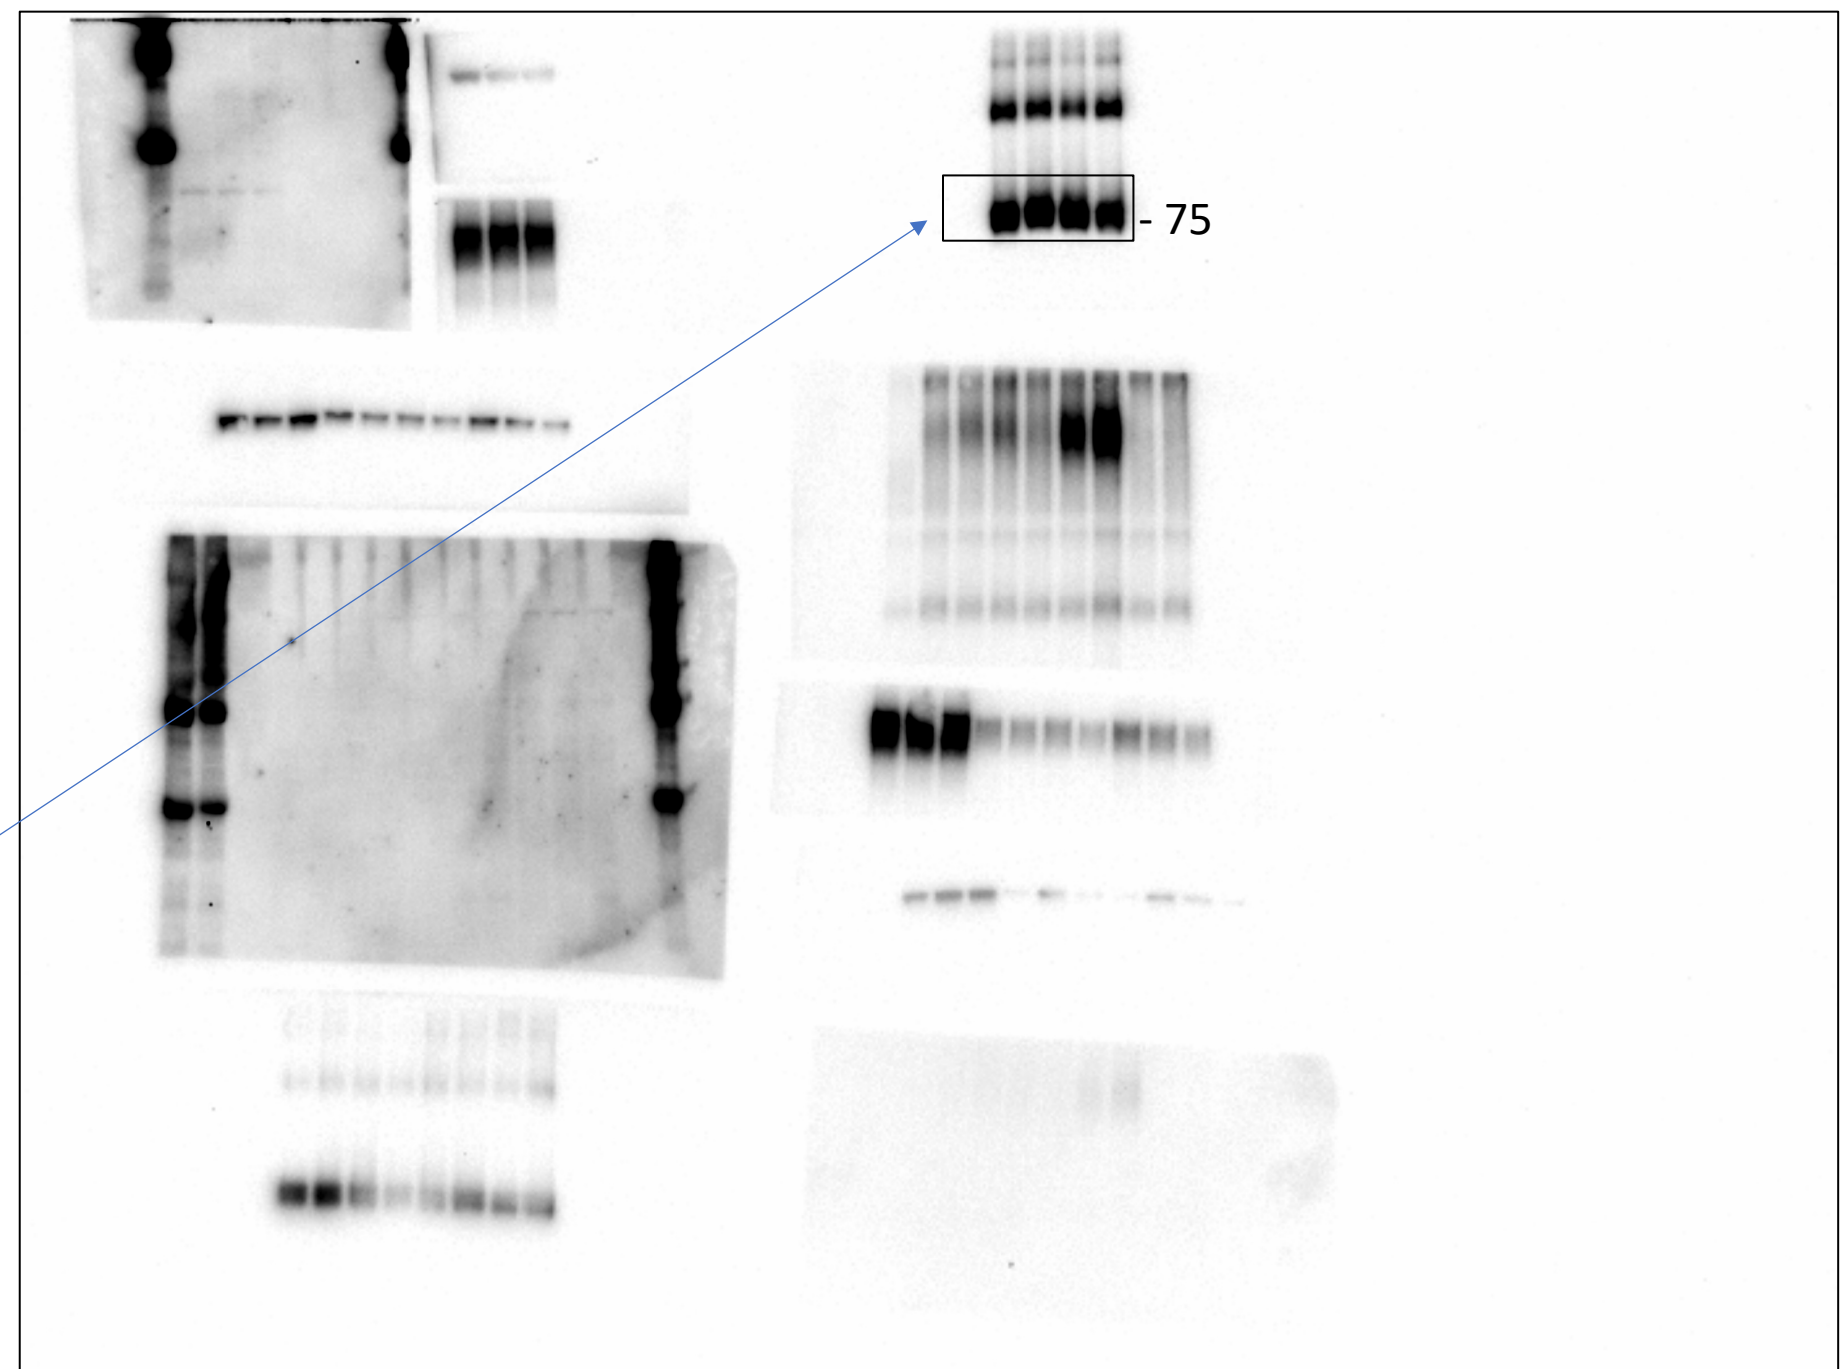



# Figure 3D

## Part 1

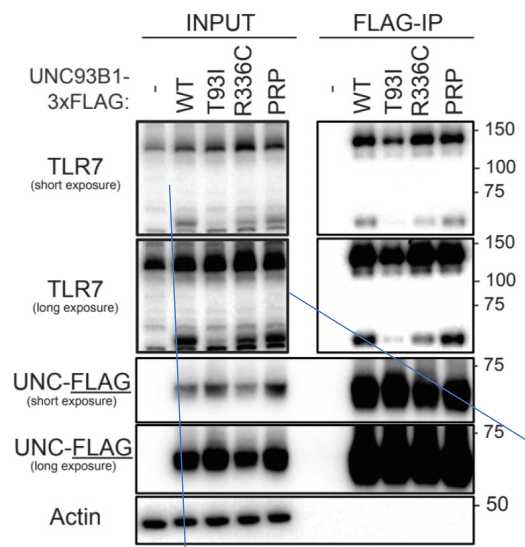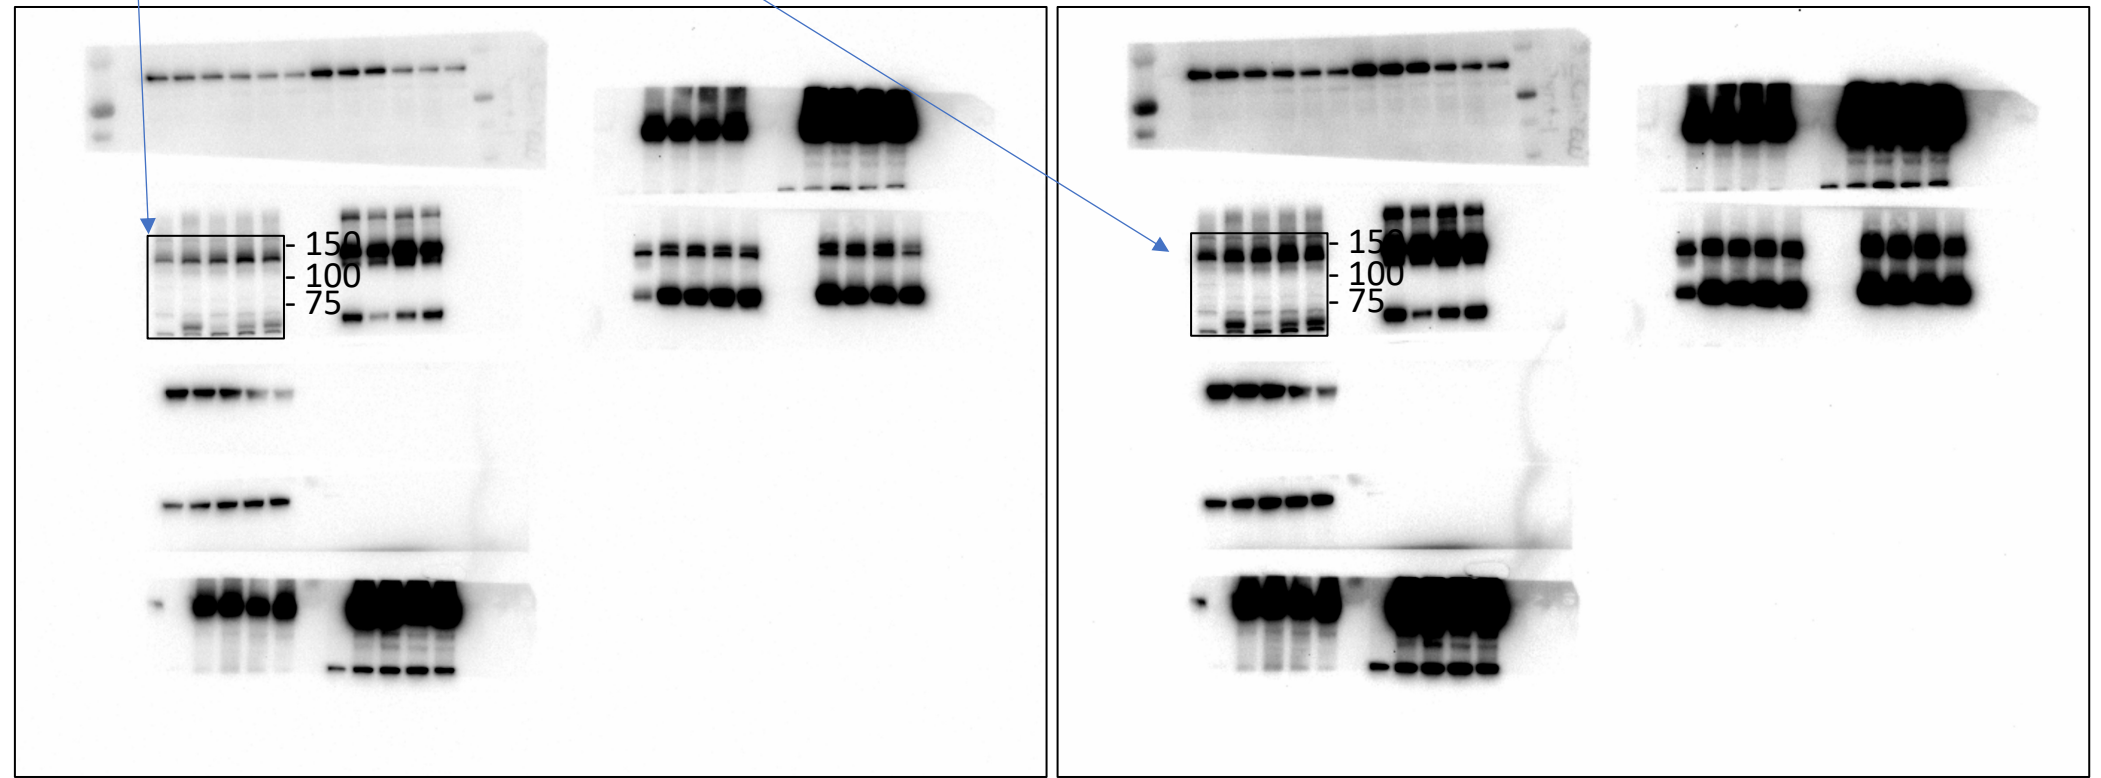

# Figure 3D

## Part 2

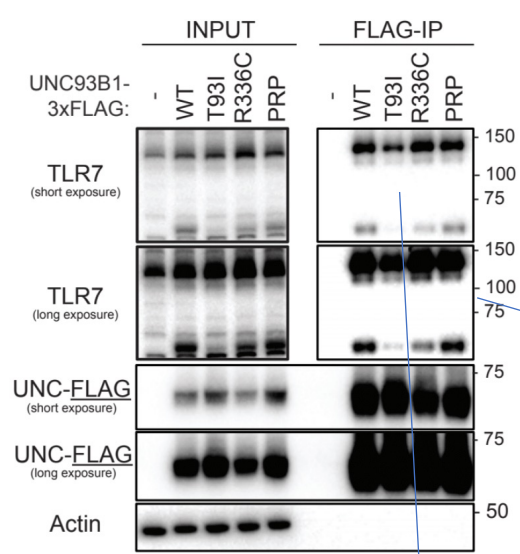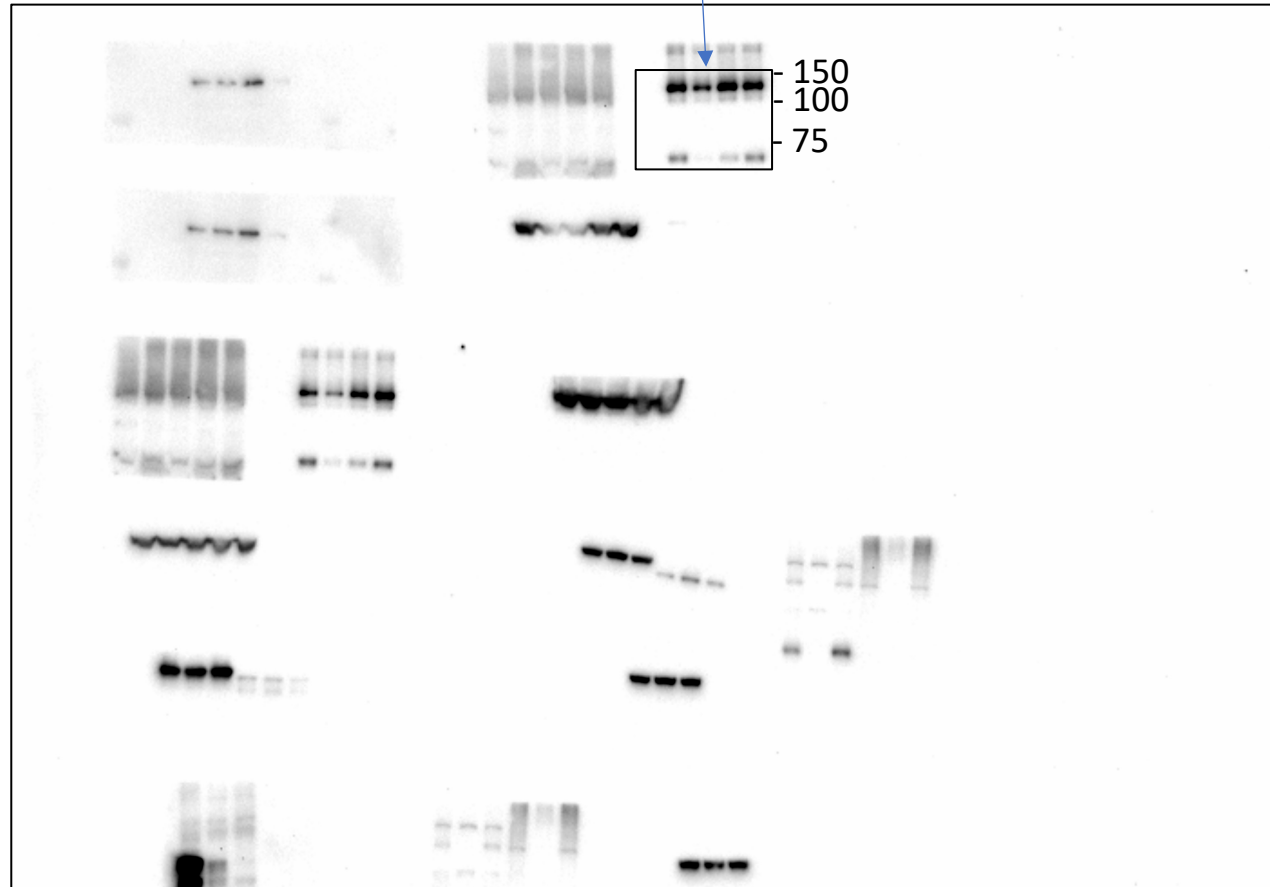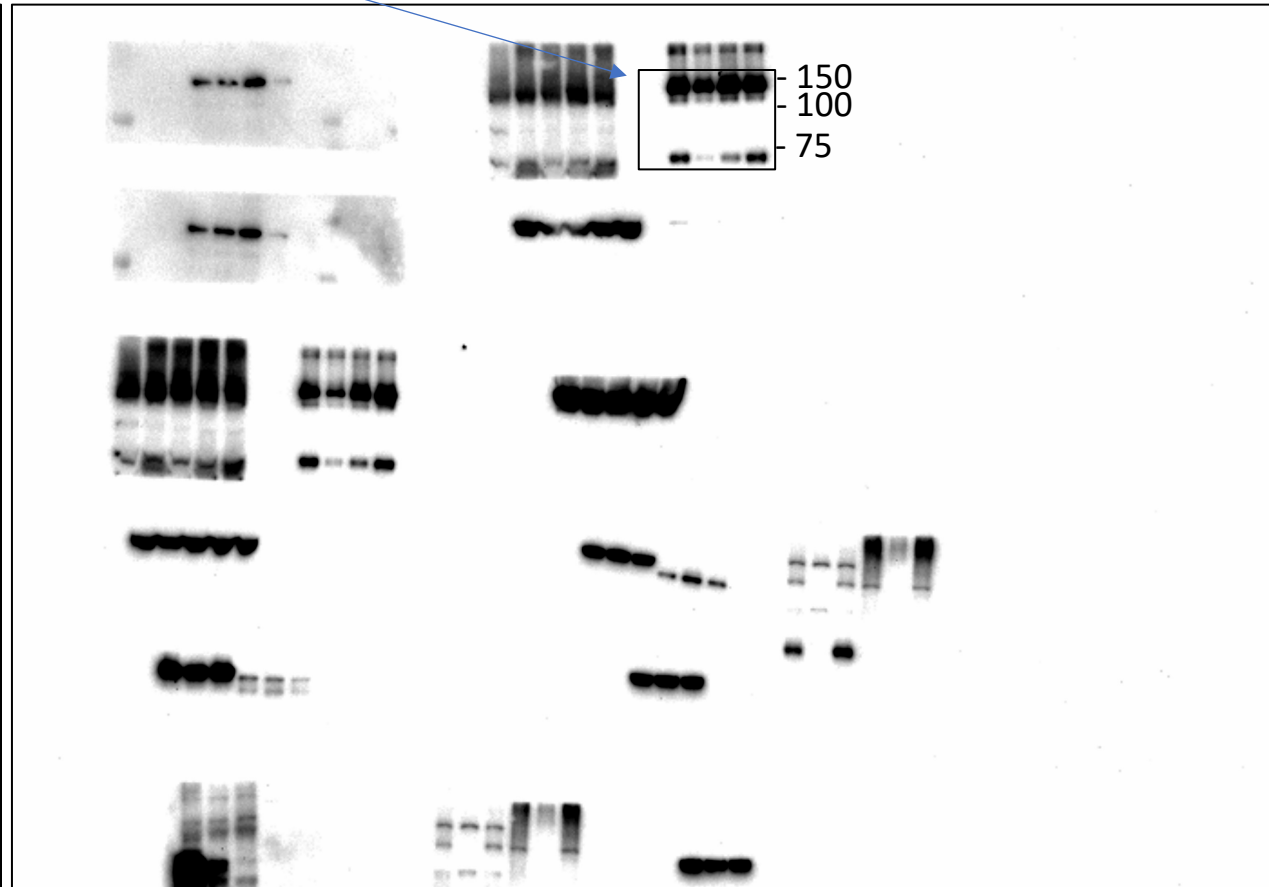

# Figure 3D

## Part 3

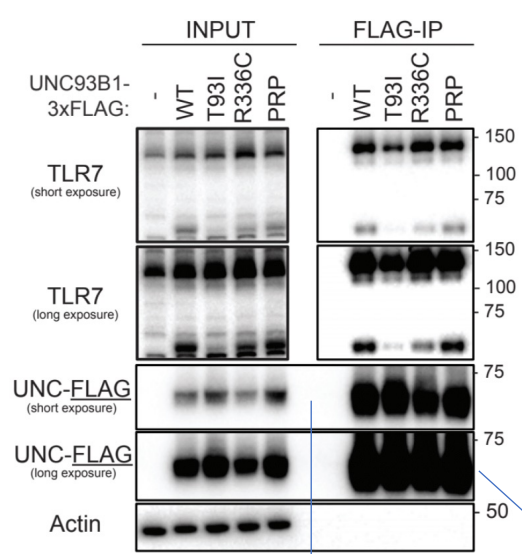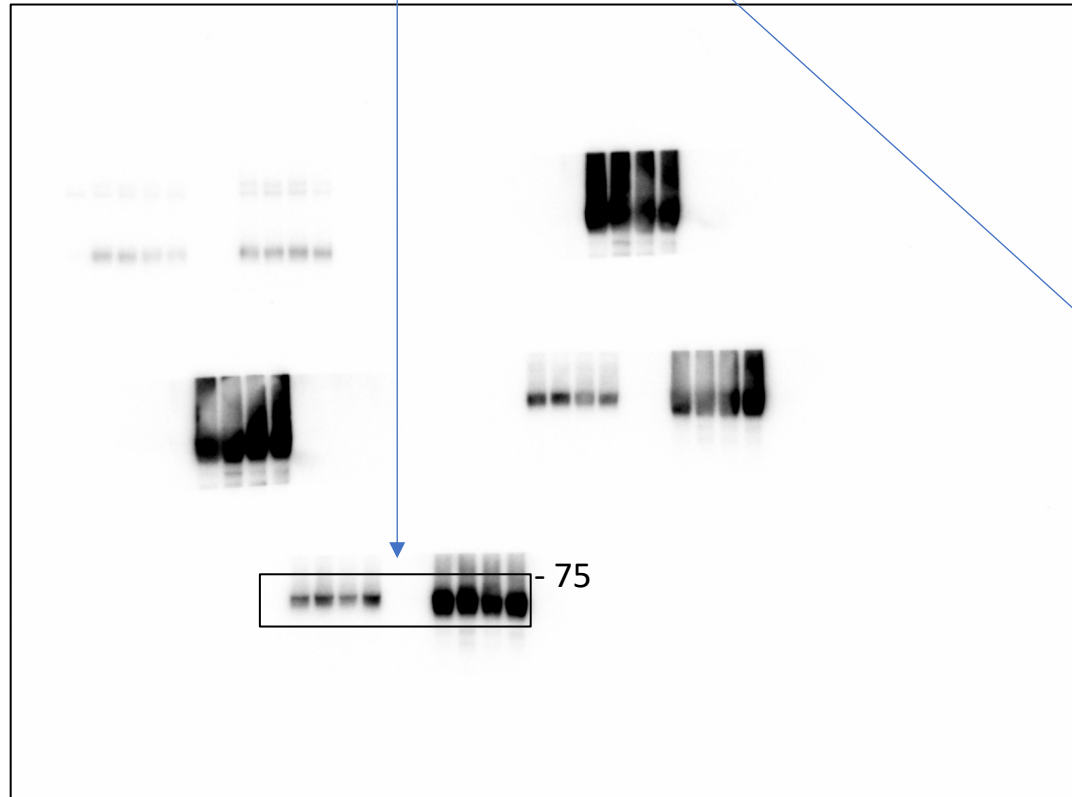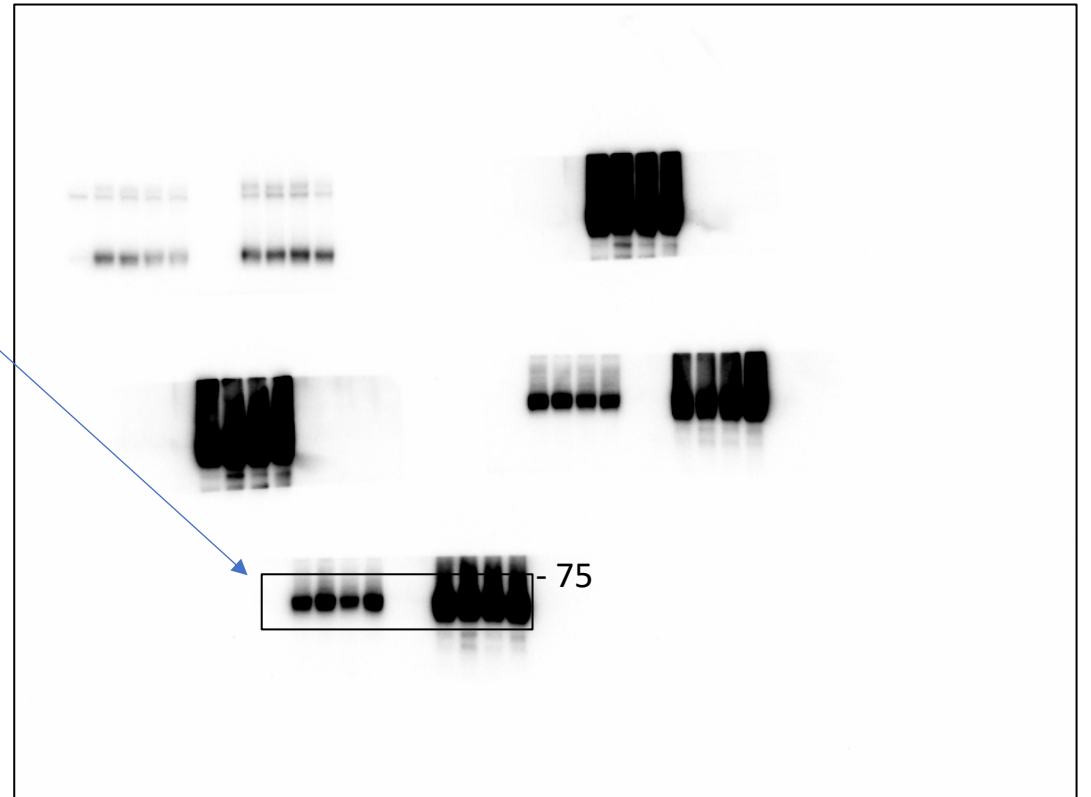

# Figure 3D

## Part 4

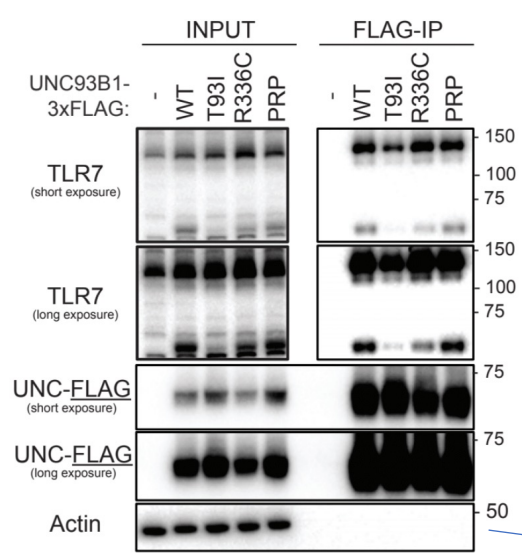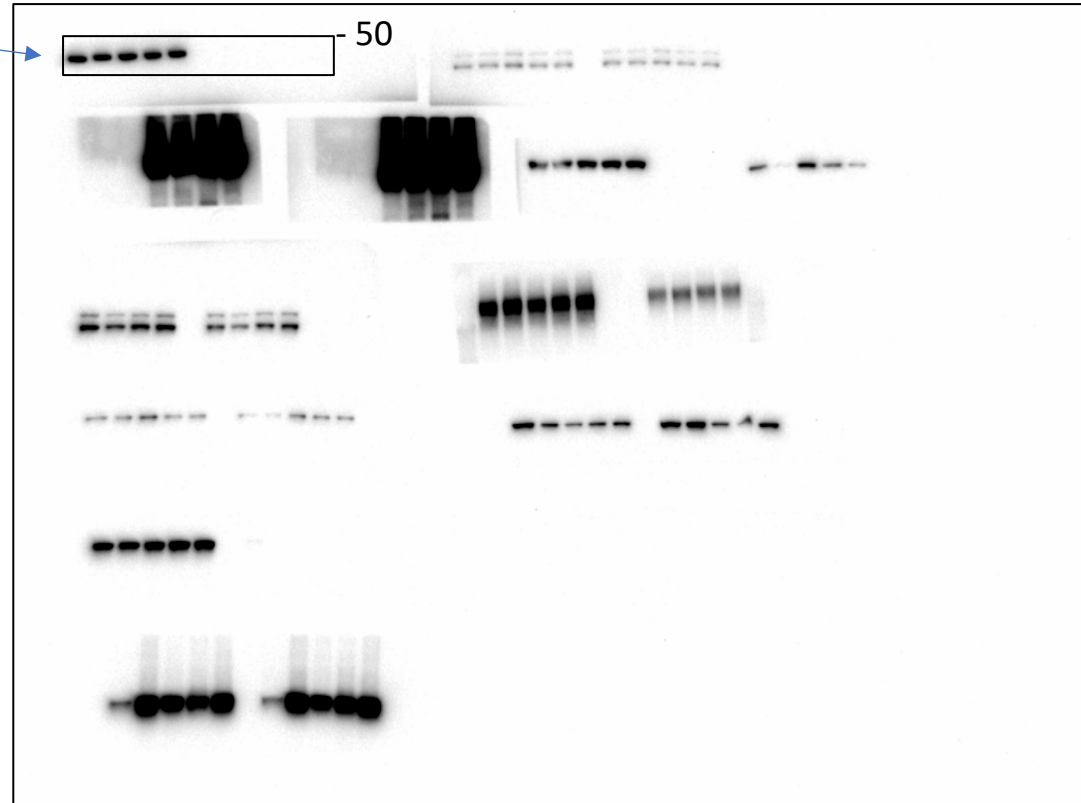

# Figure 3E

## Part 1

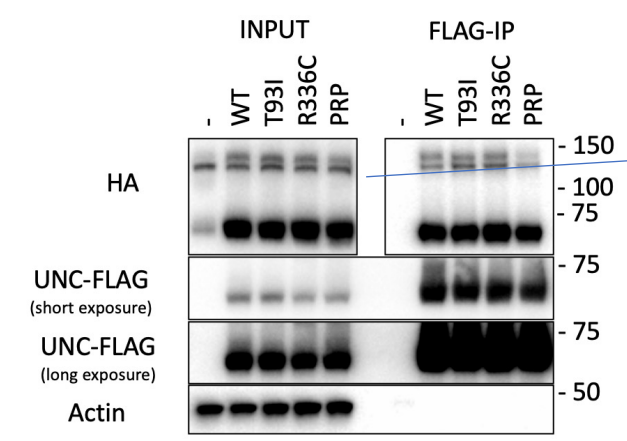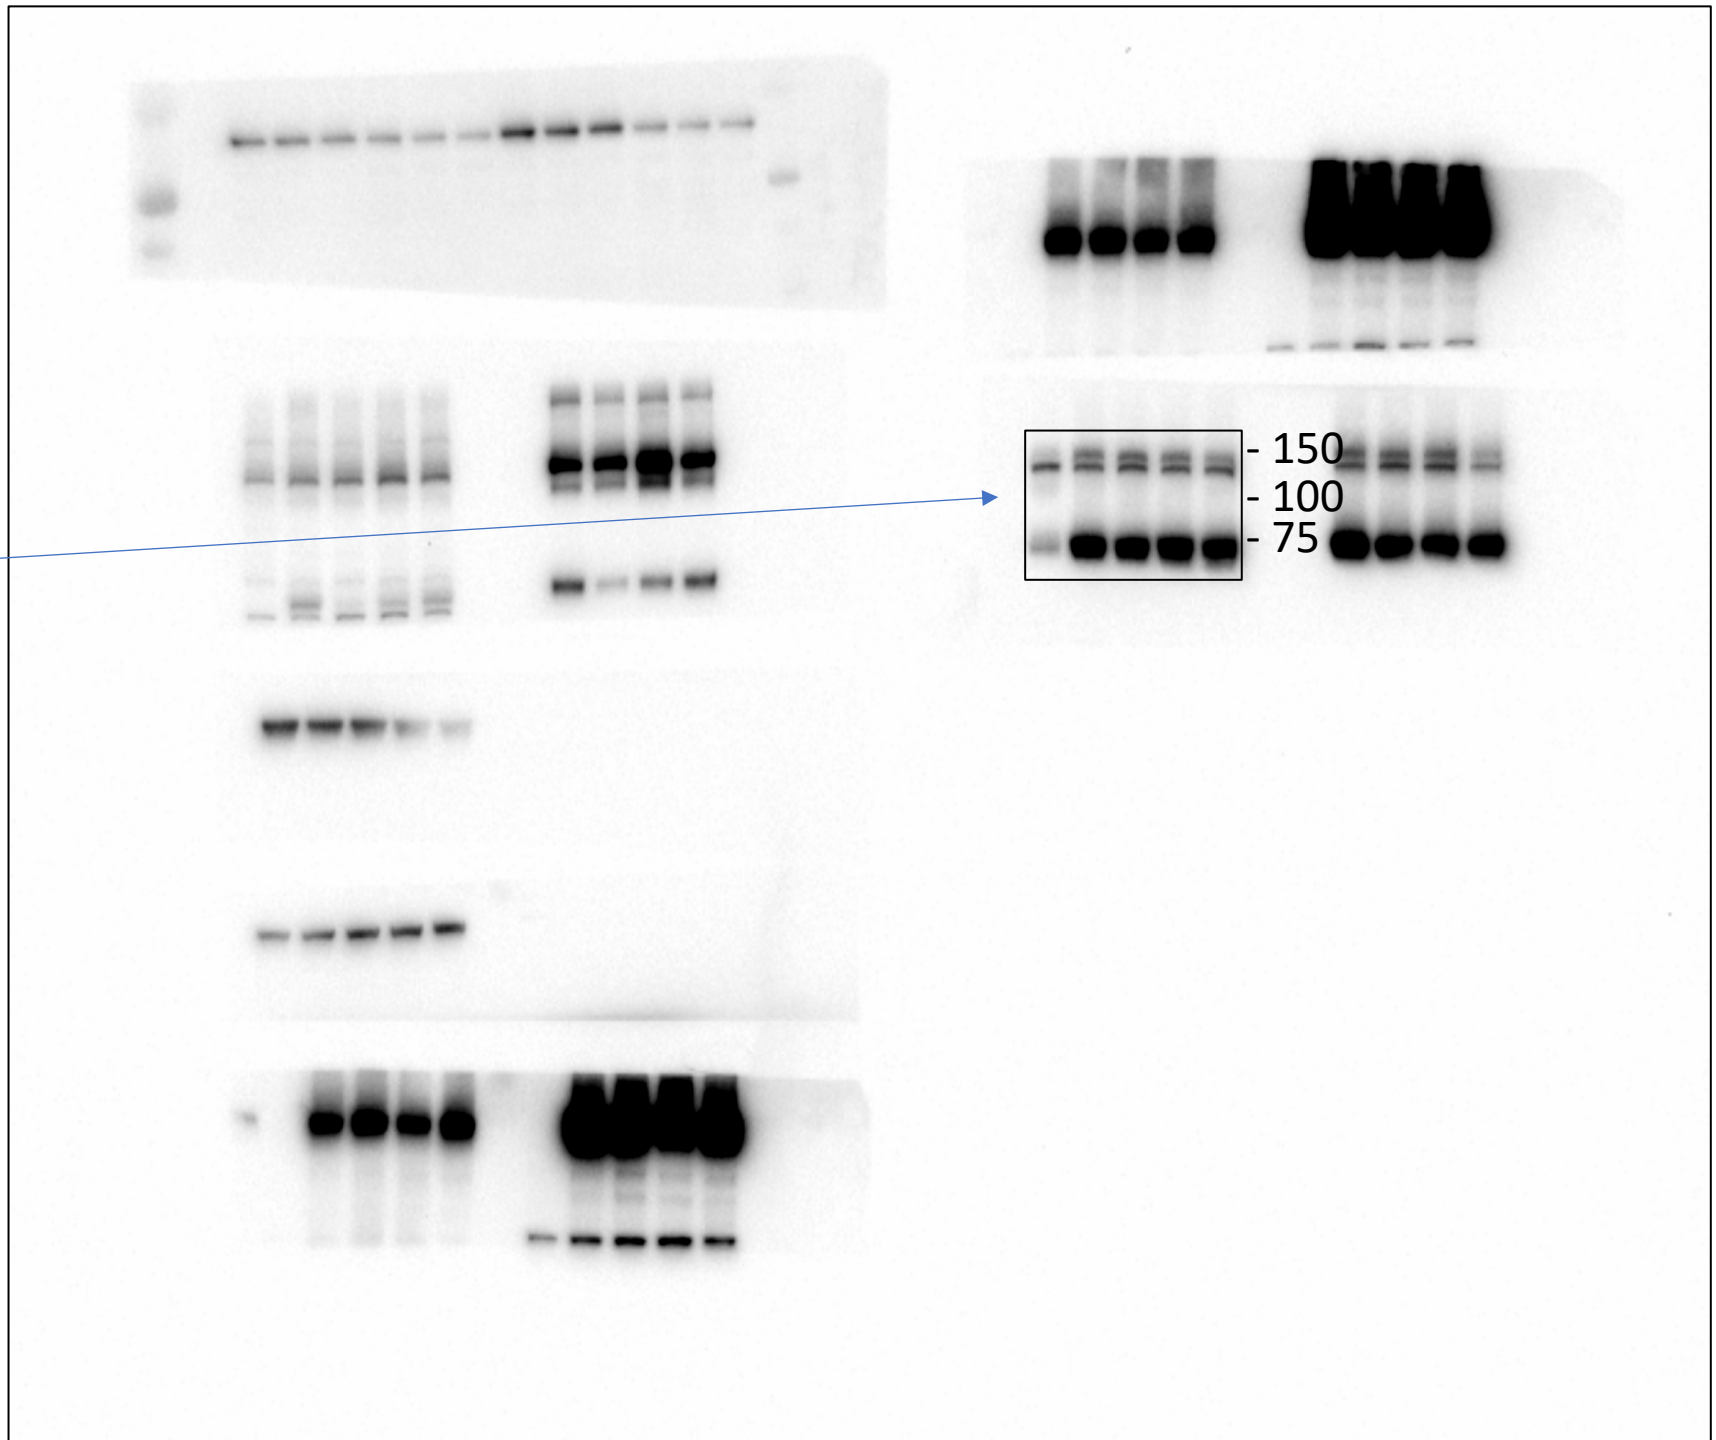

# Figure 3E

## Part 2

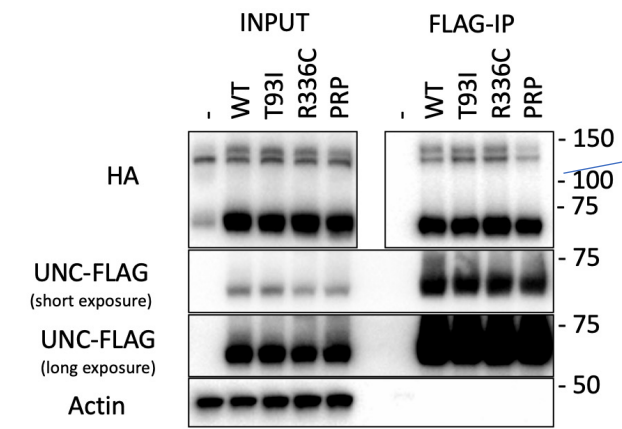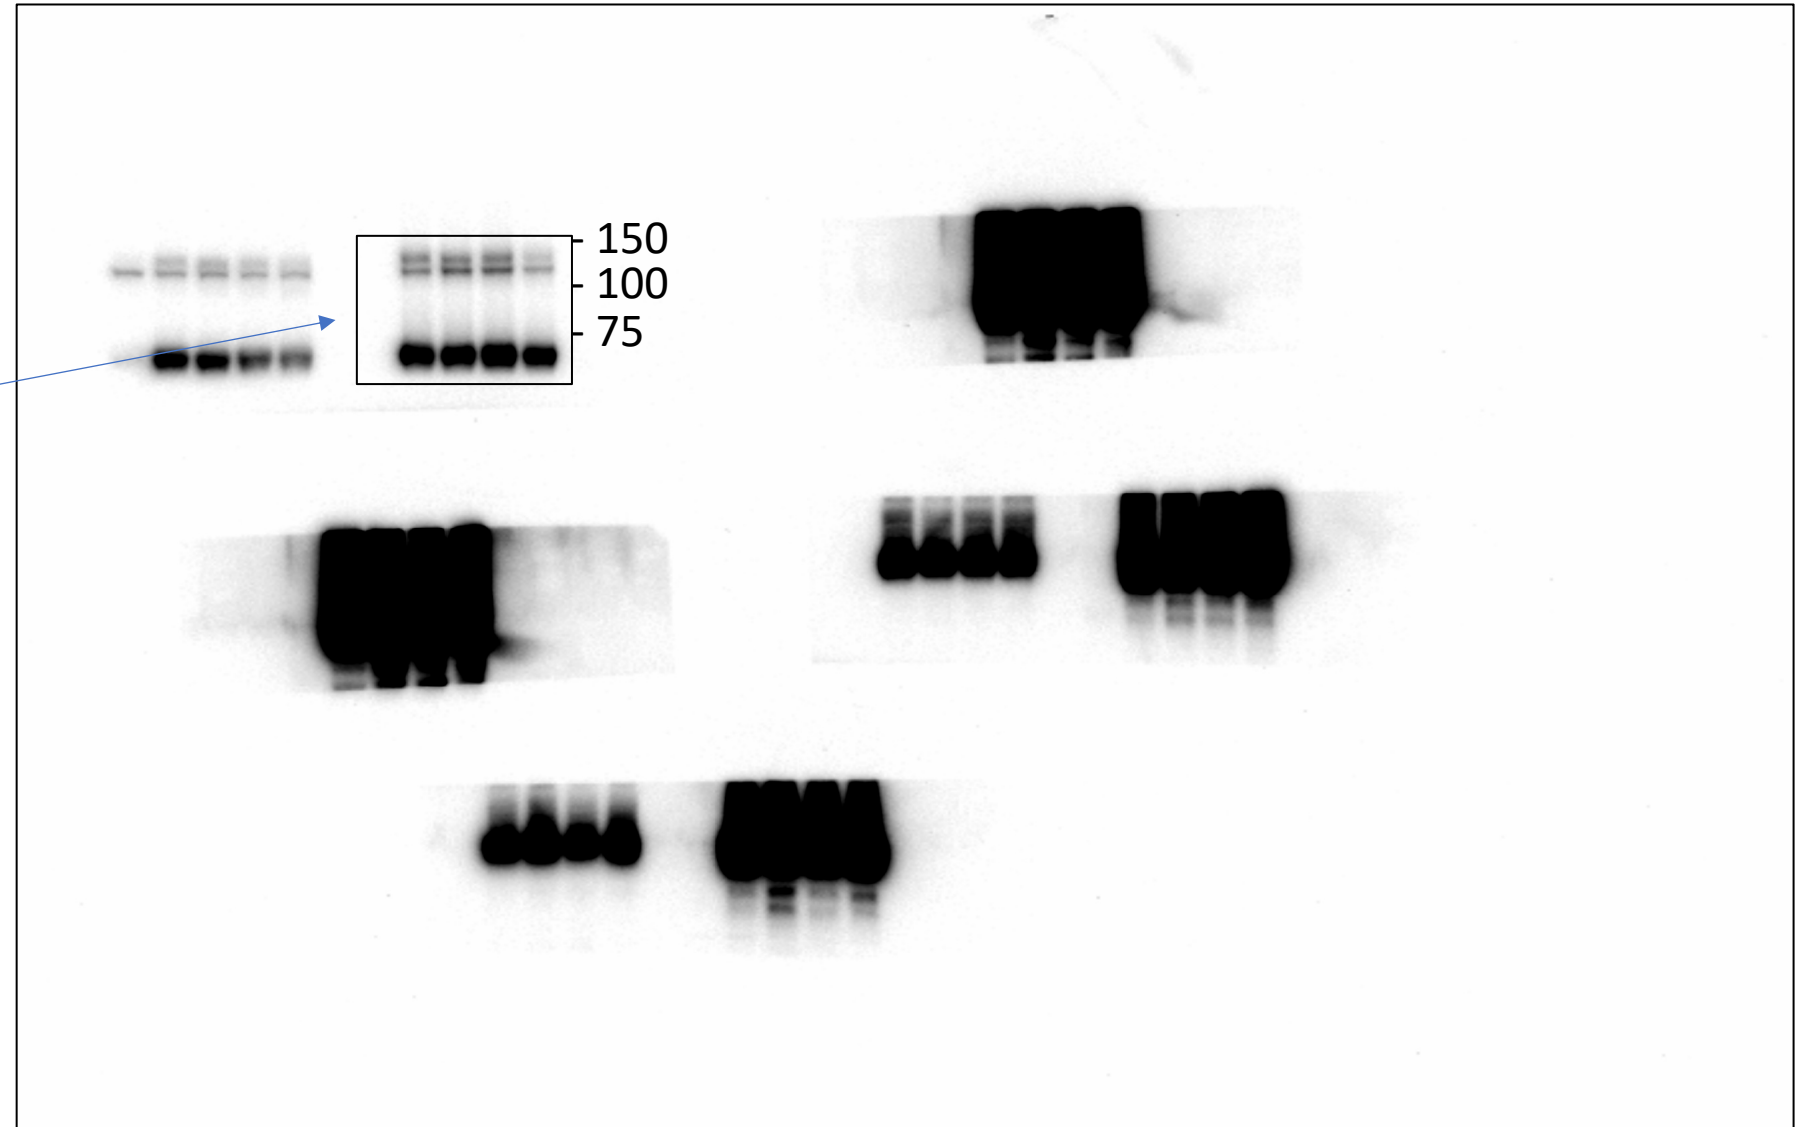

# Figure 3E

## Part 3

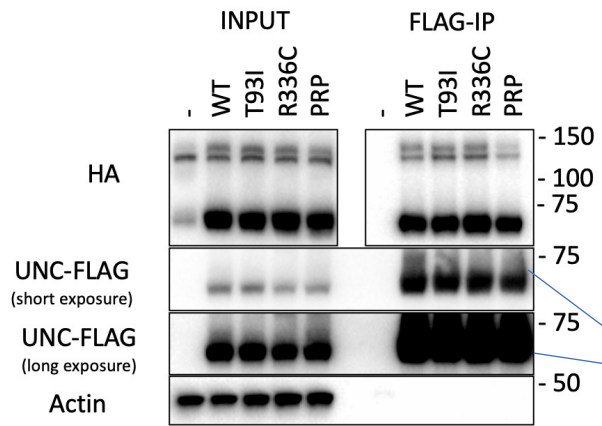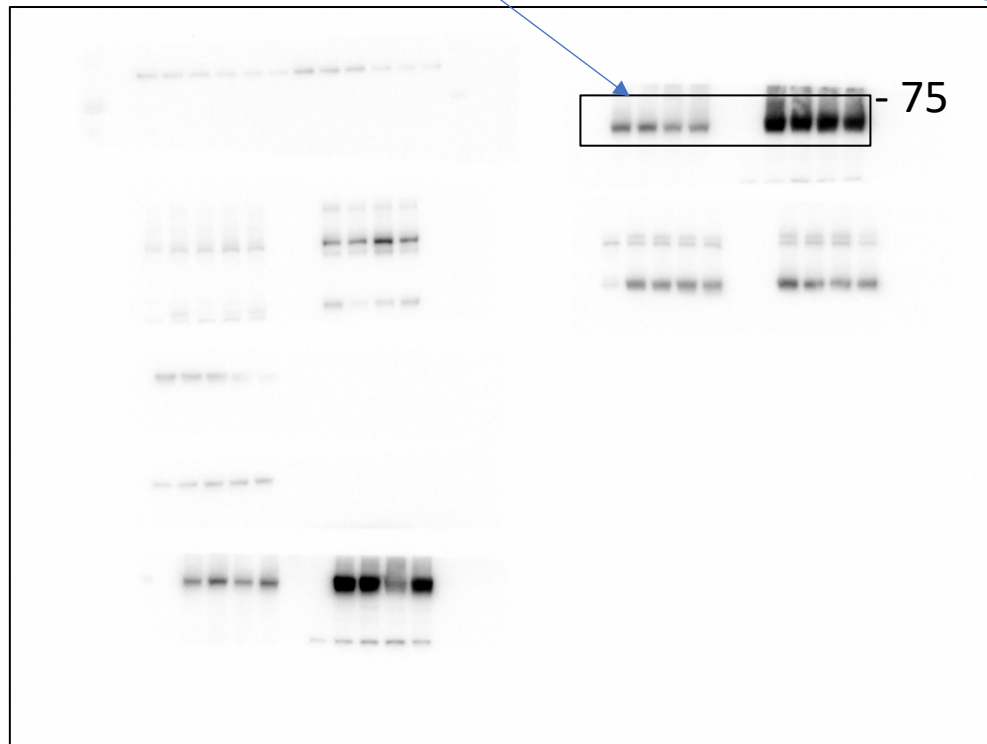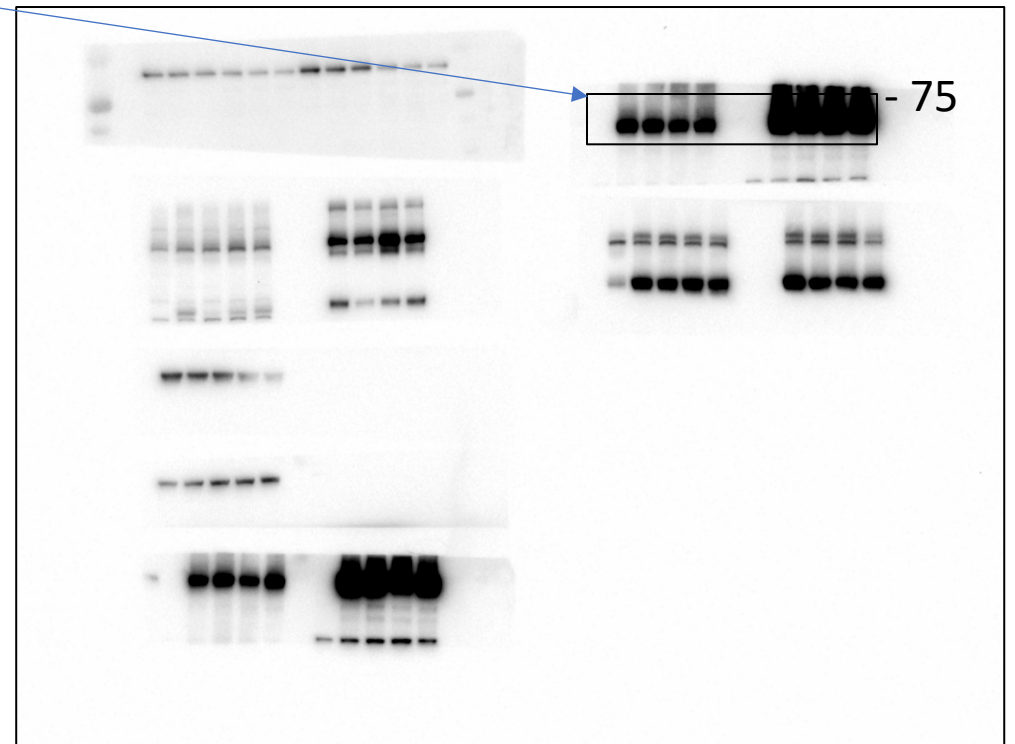

# Figure 3E

## Part 4

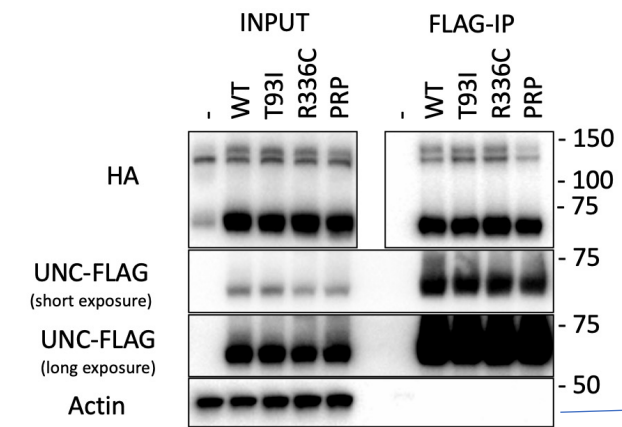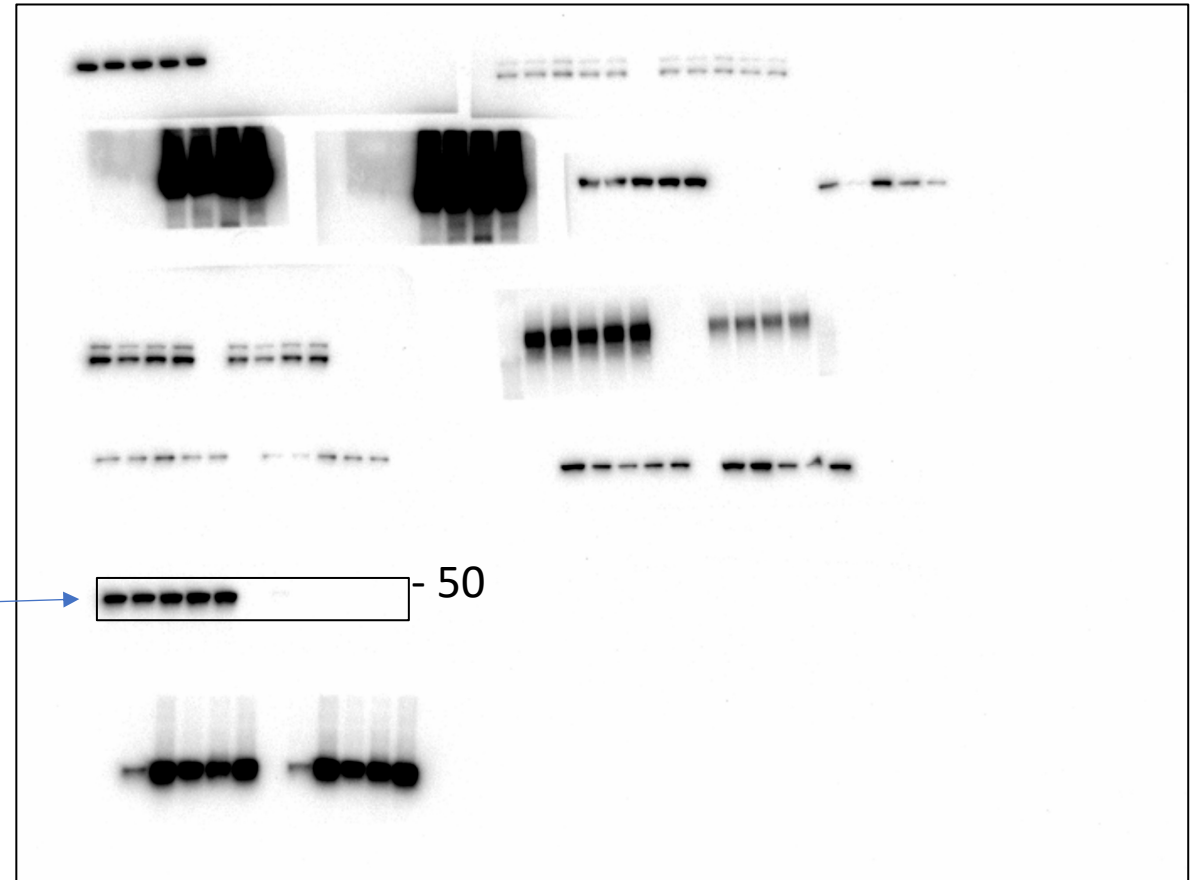



# Figure 3F

## Part 1

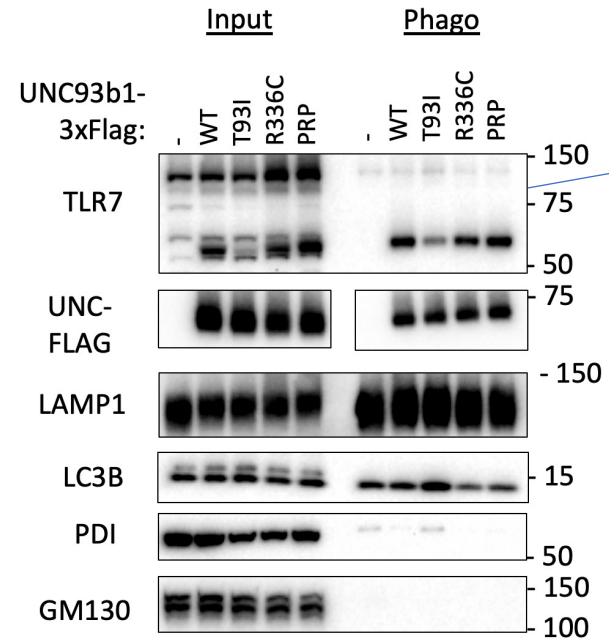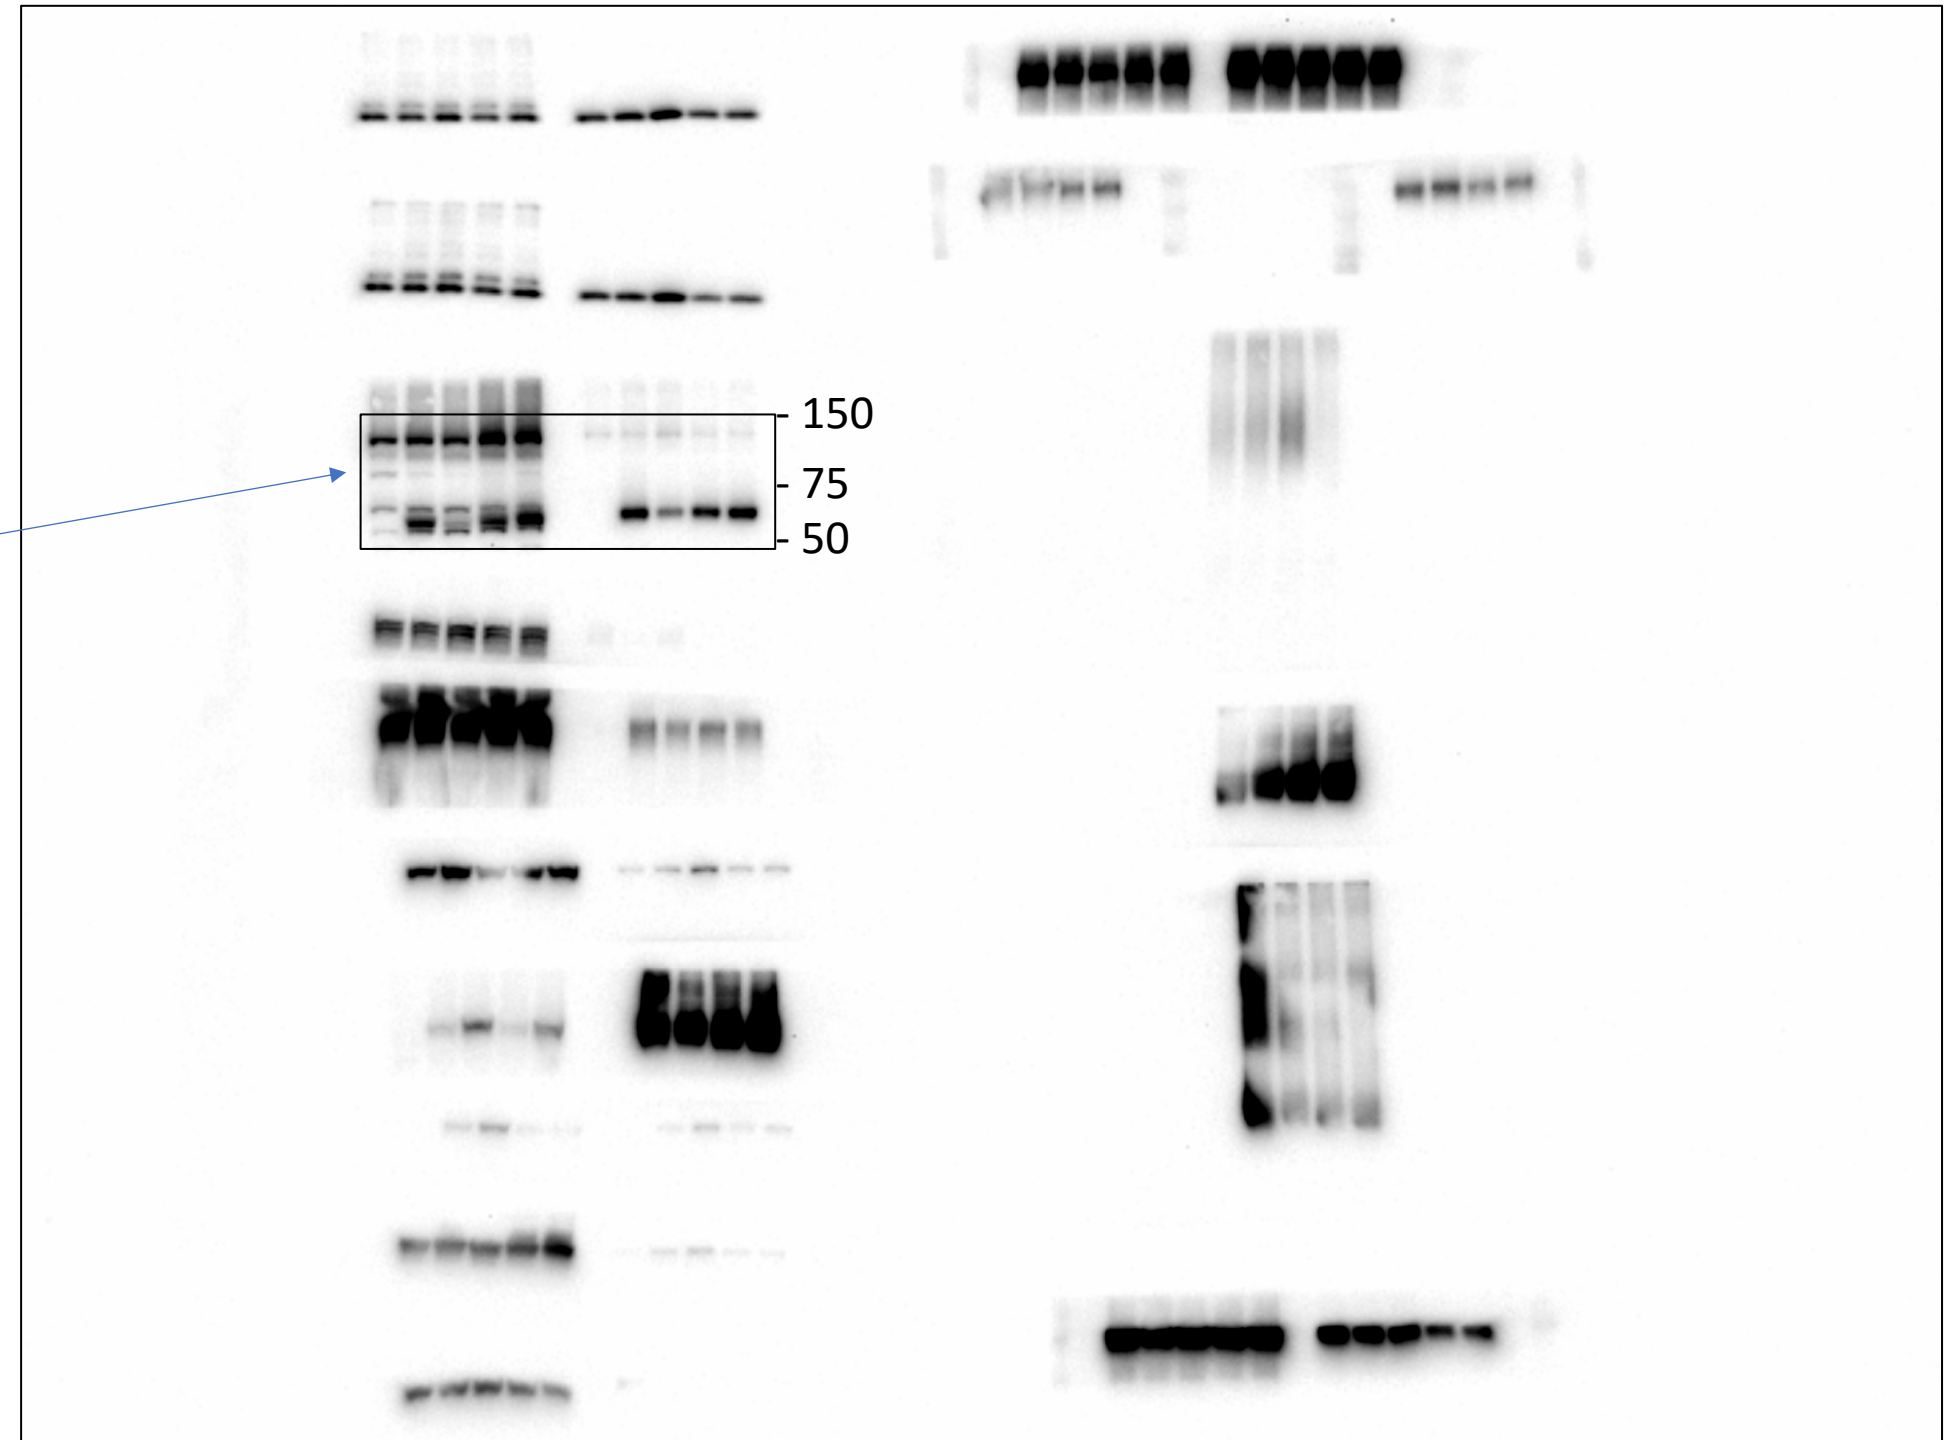

# Figure 3F

## Part 2

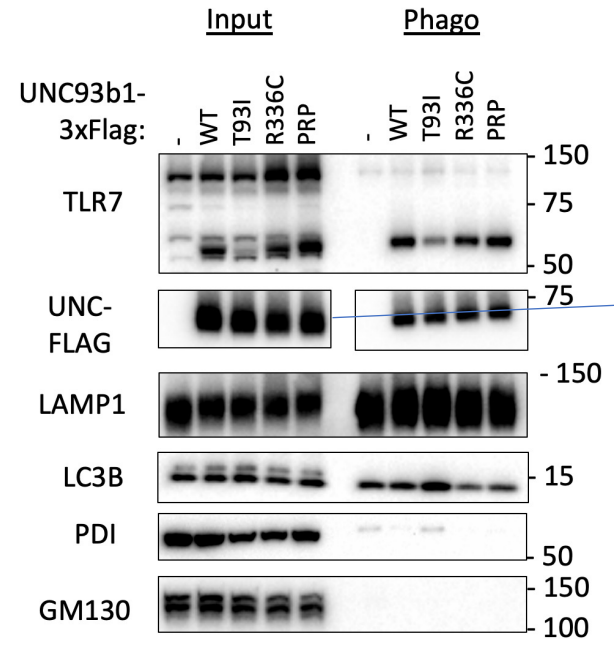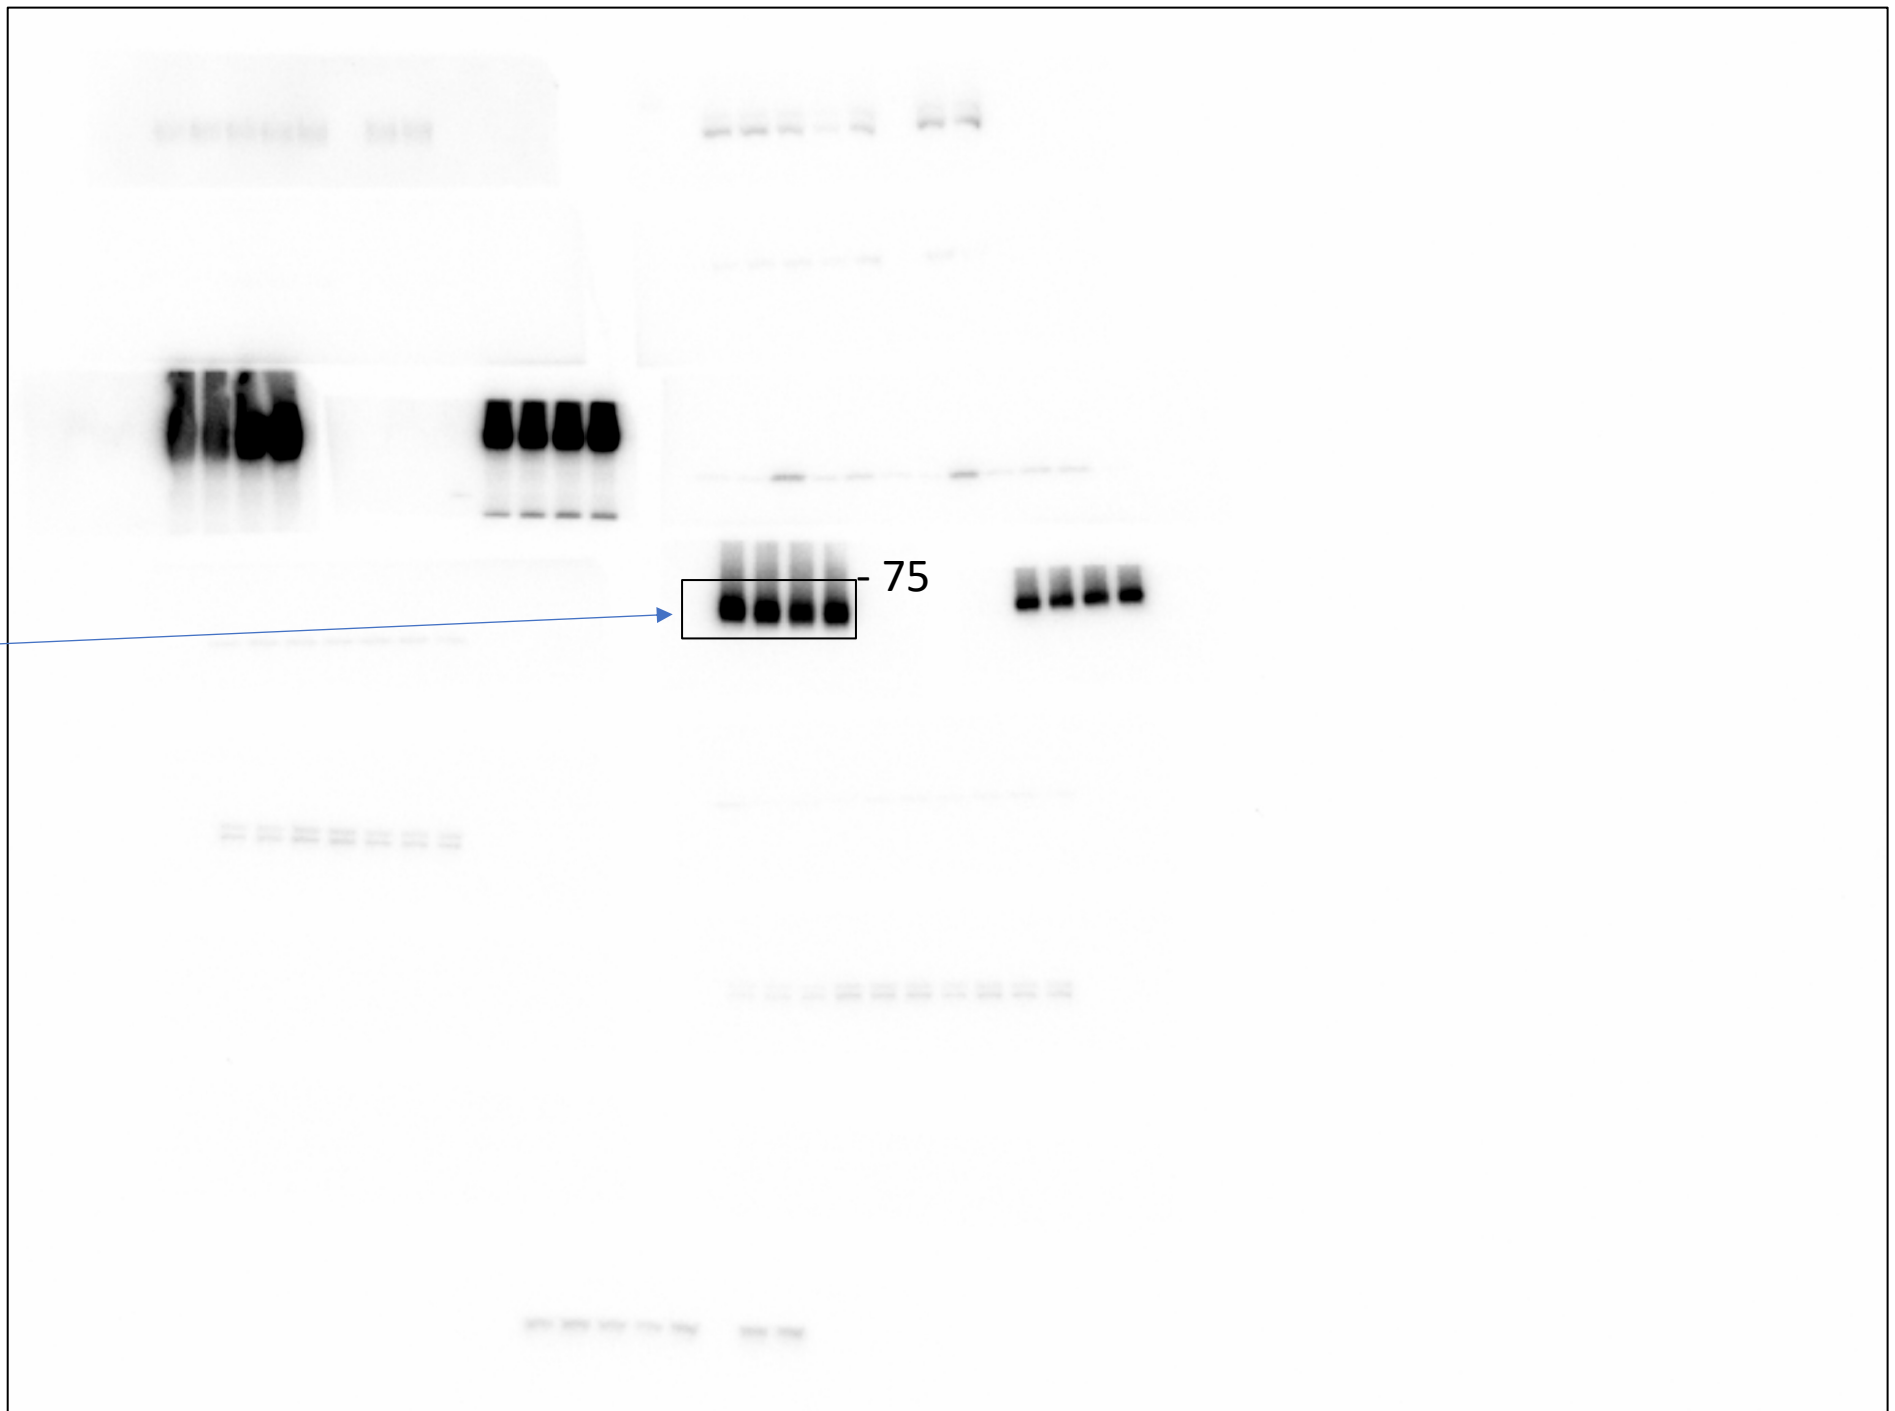

# Figure 3F

## Part 3

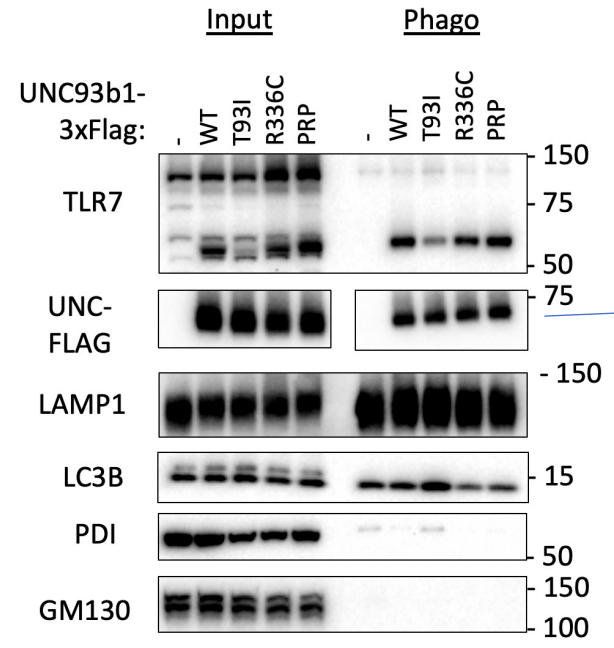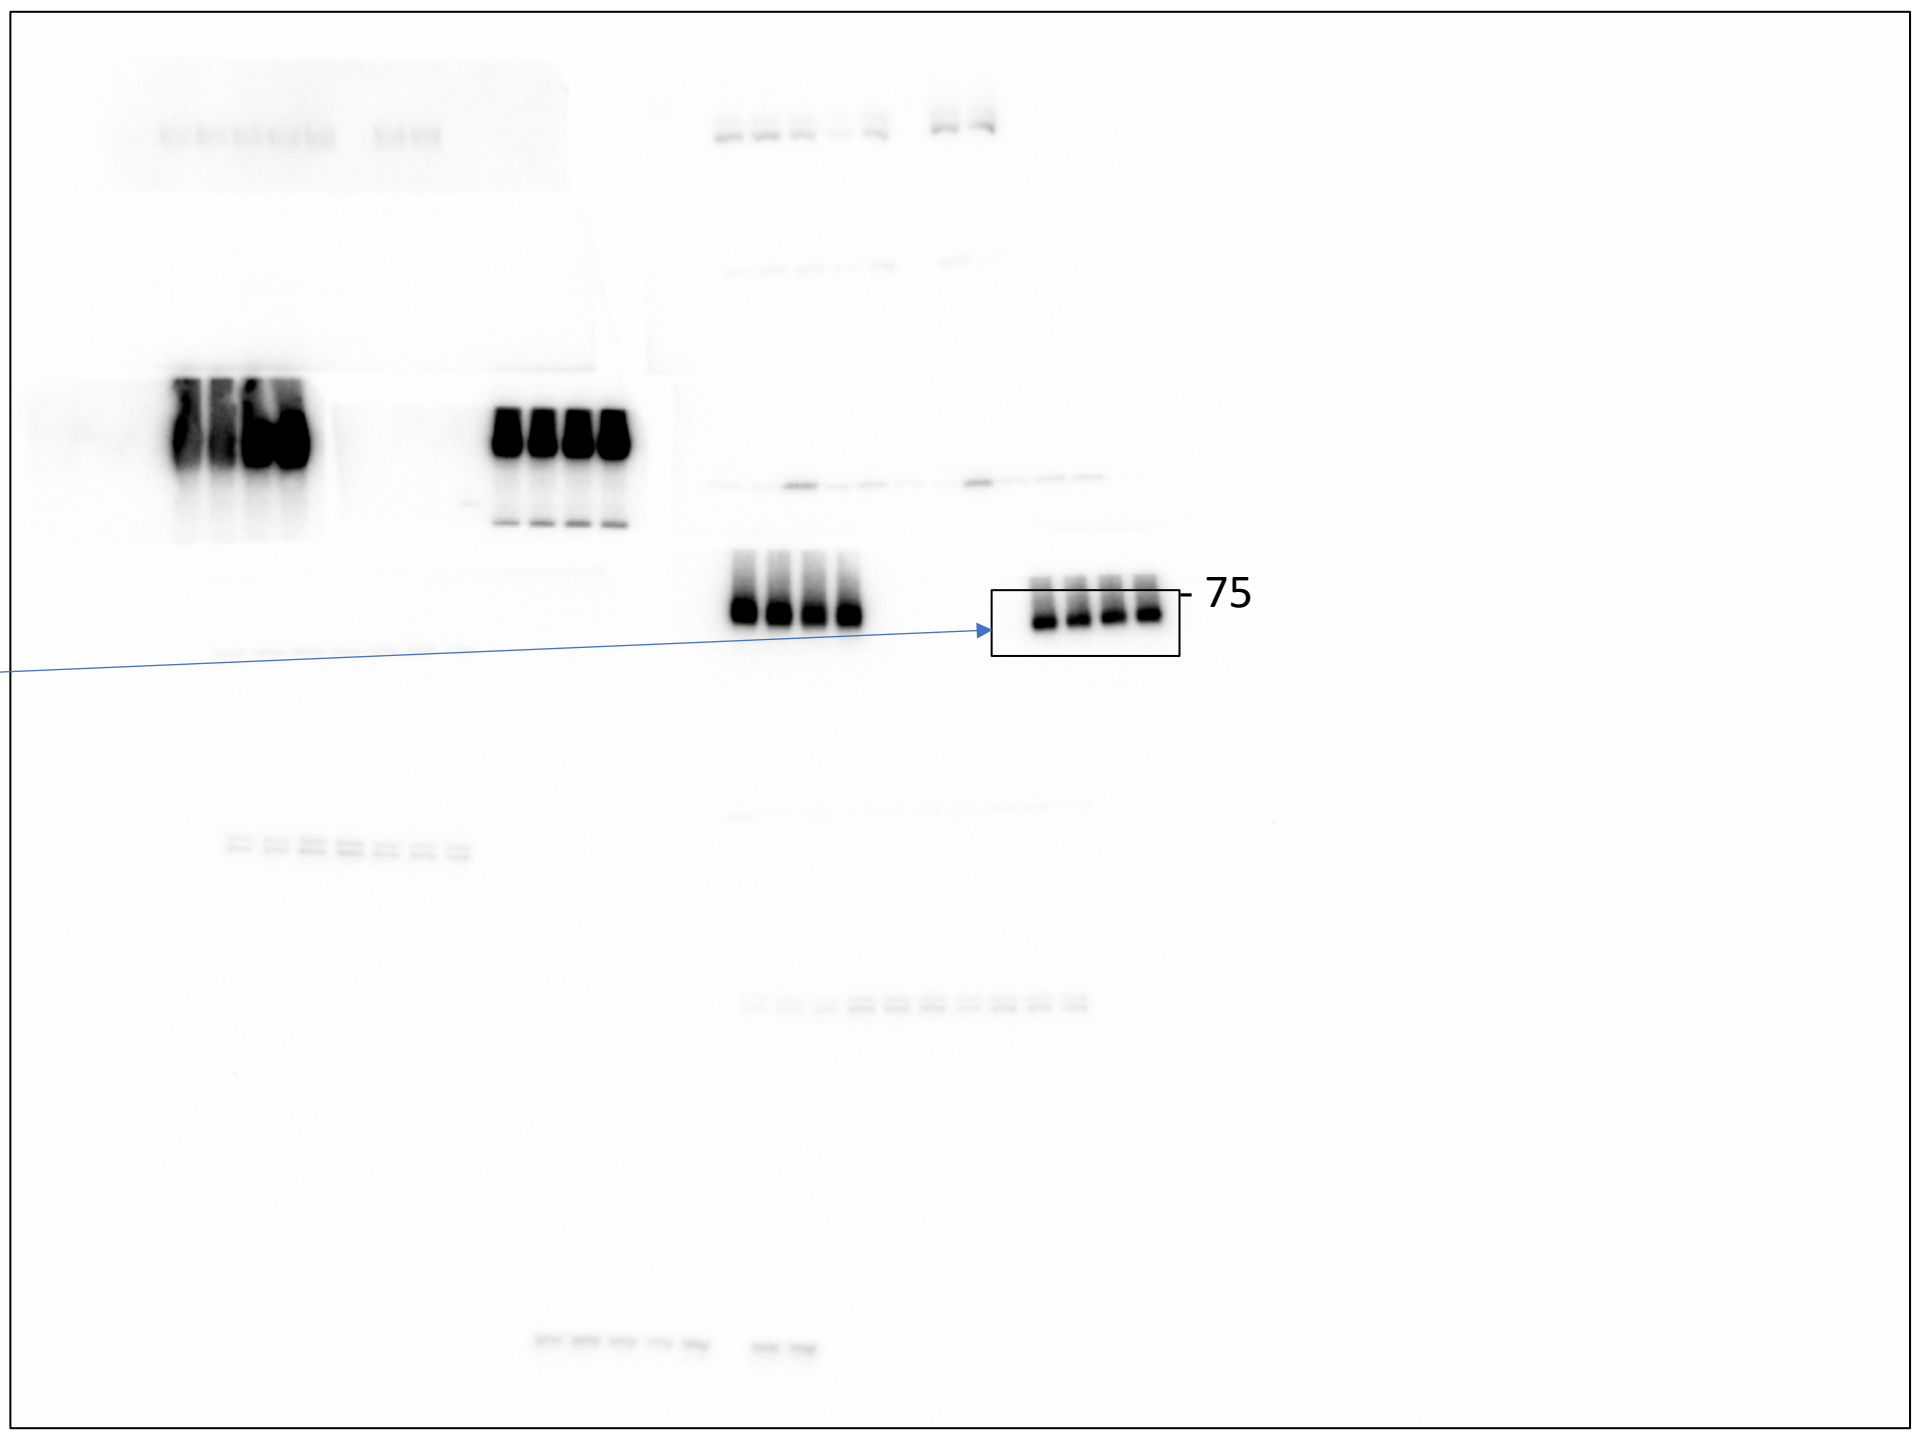

# Figure 3F

## Part 4

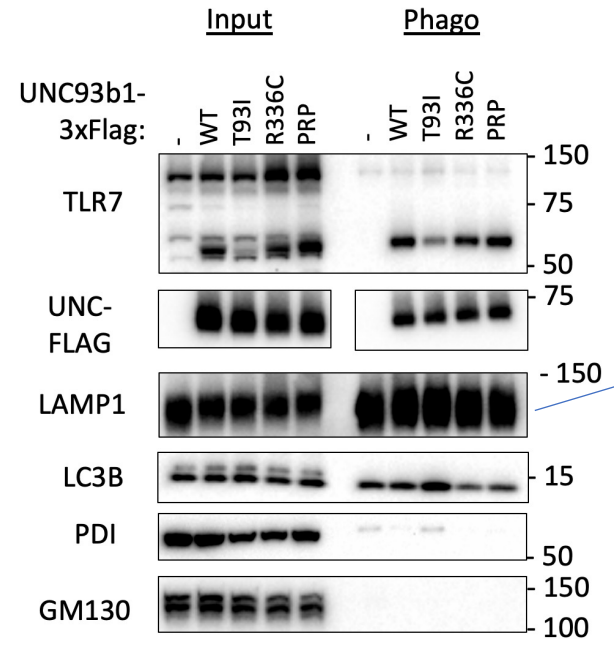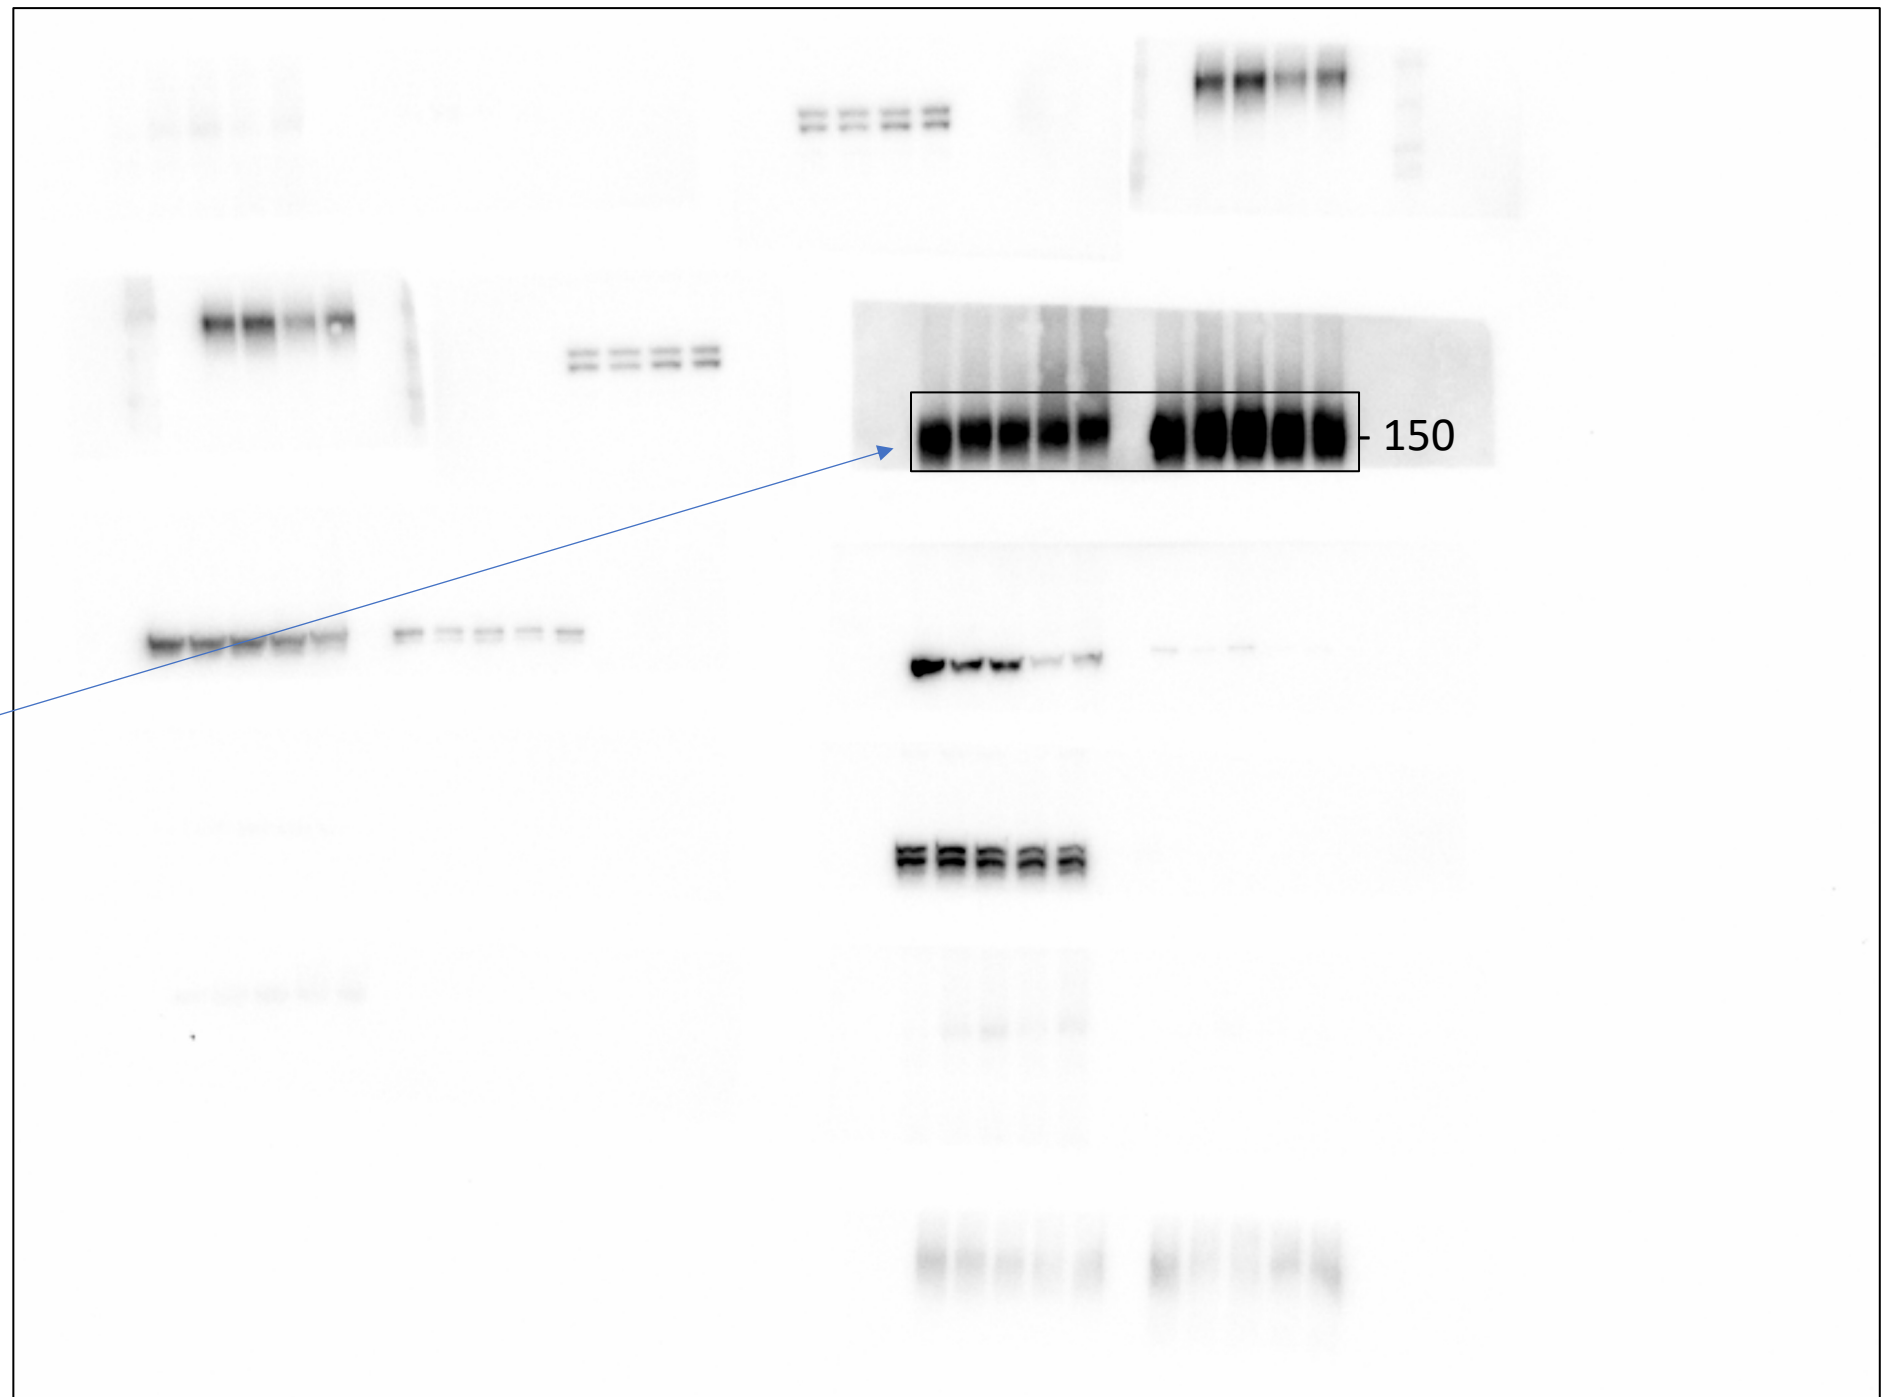

# Figure 3F

## Part 5

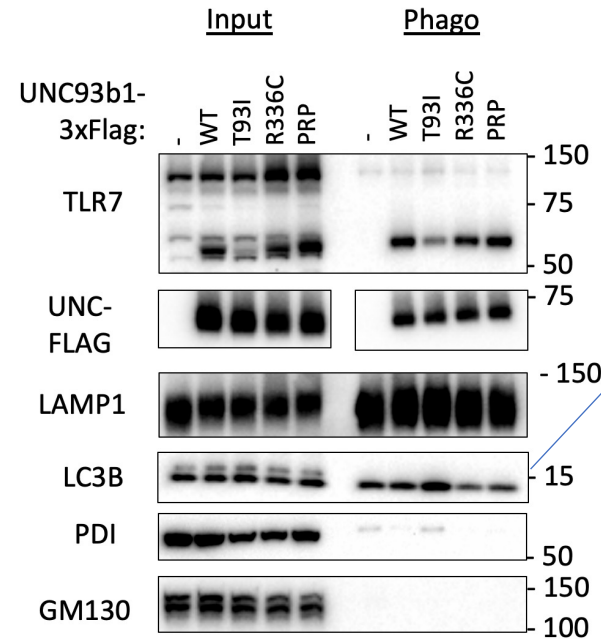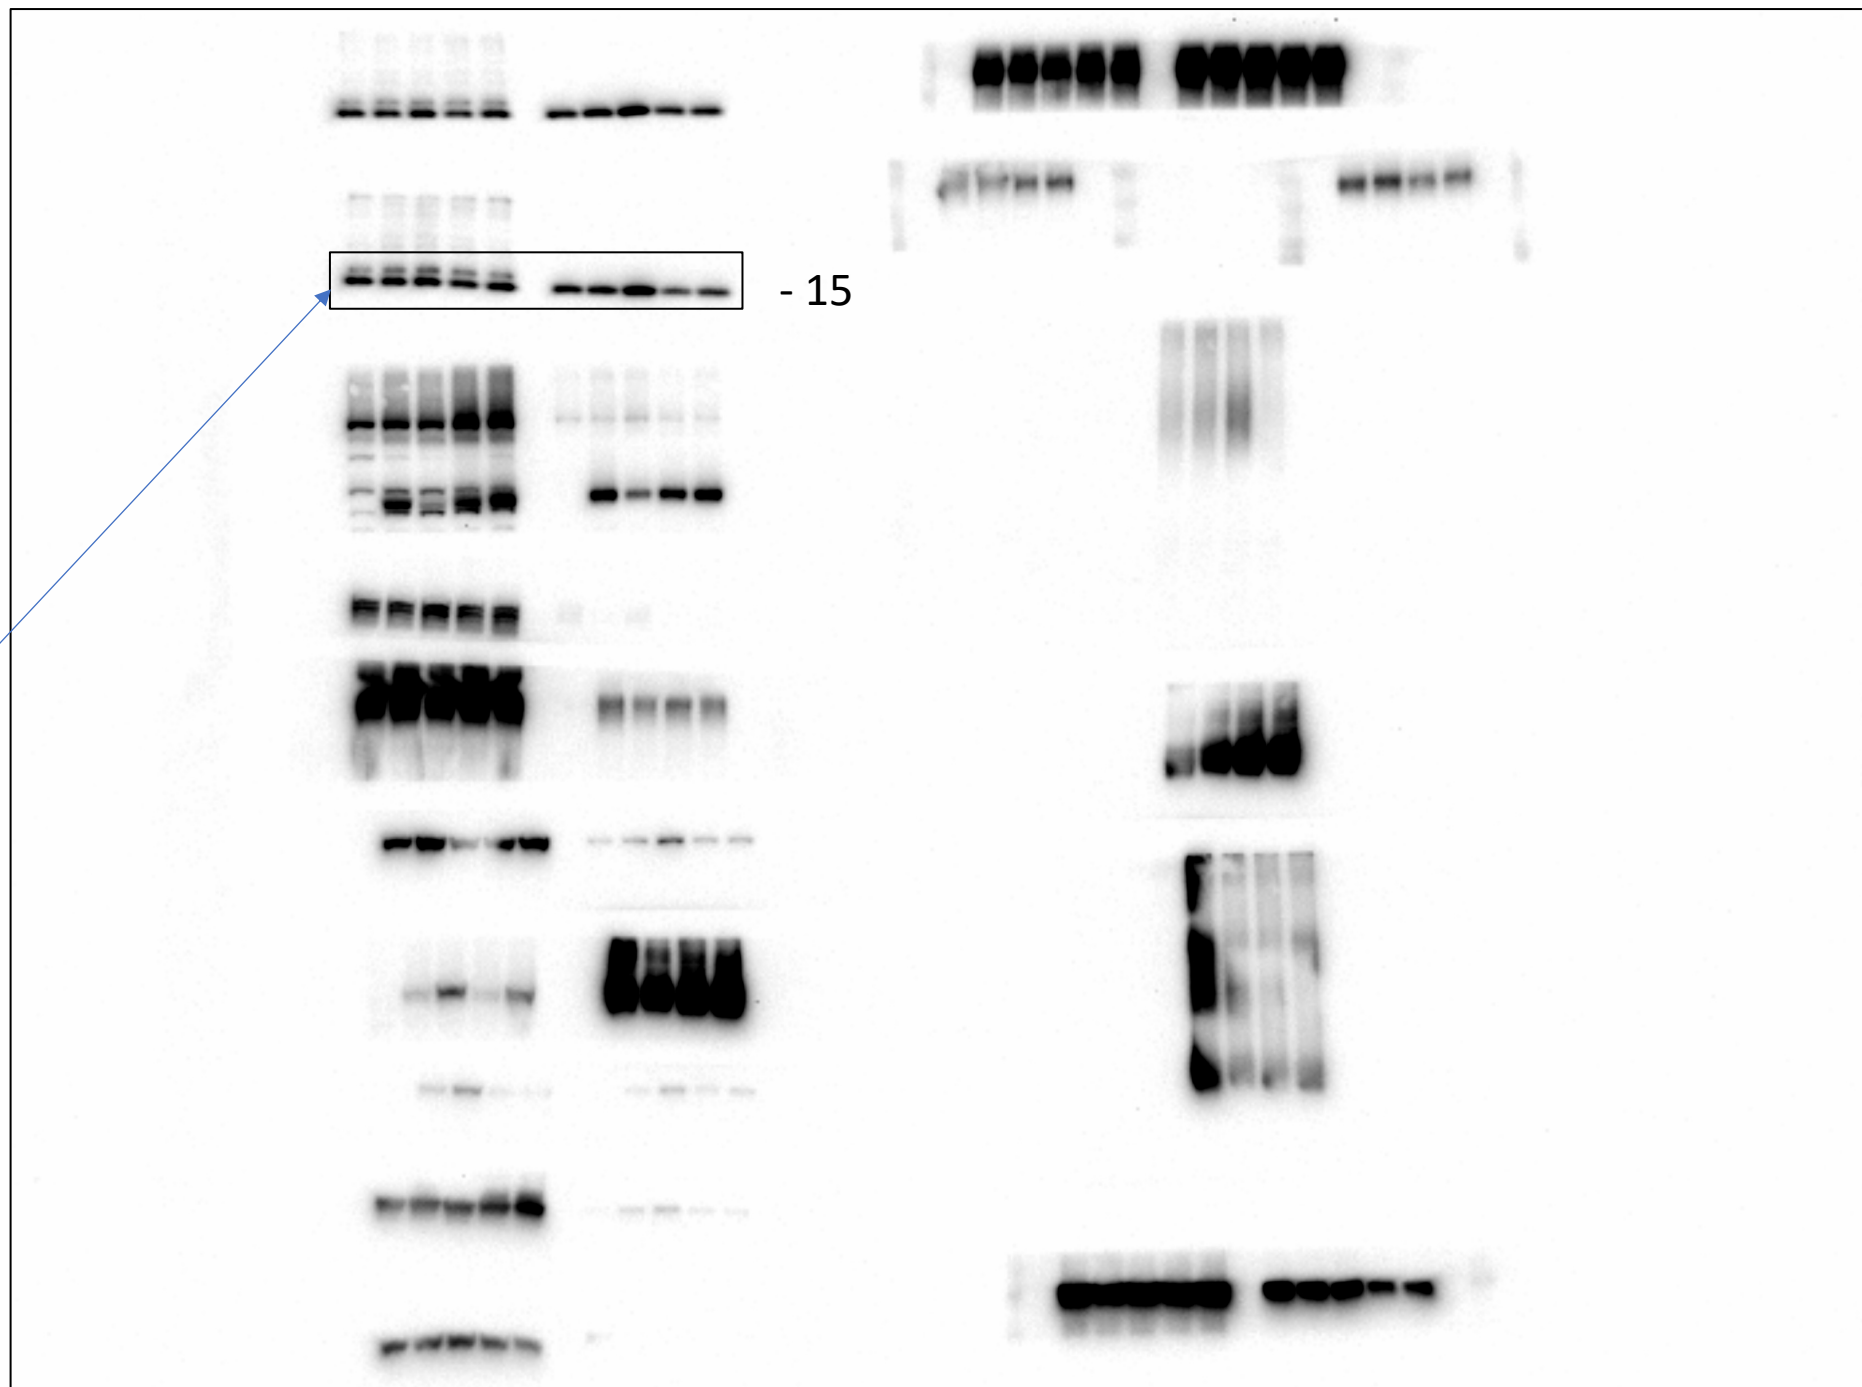

# Figure 3F

## Part 6

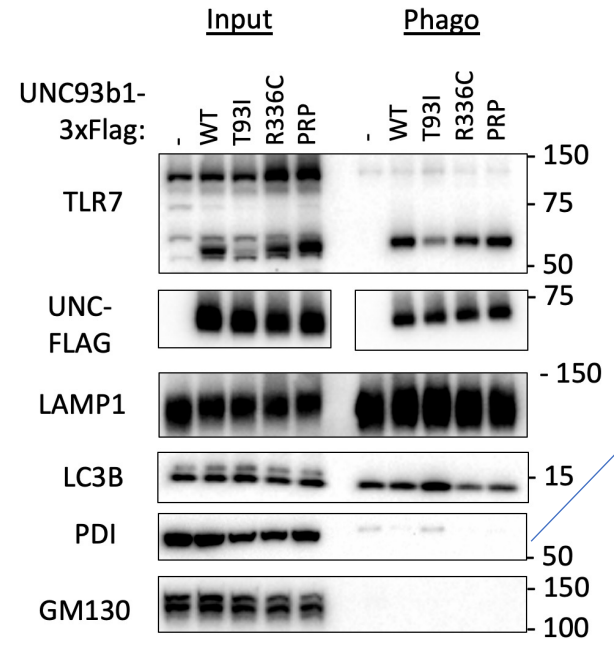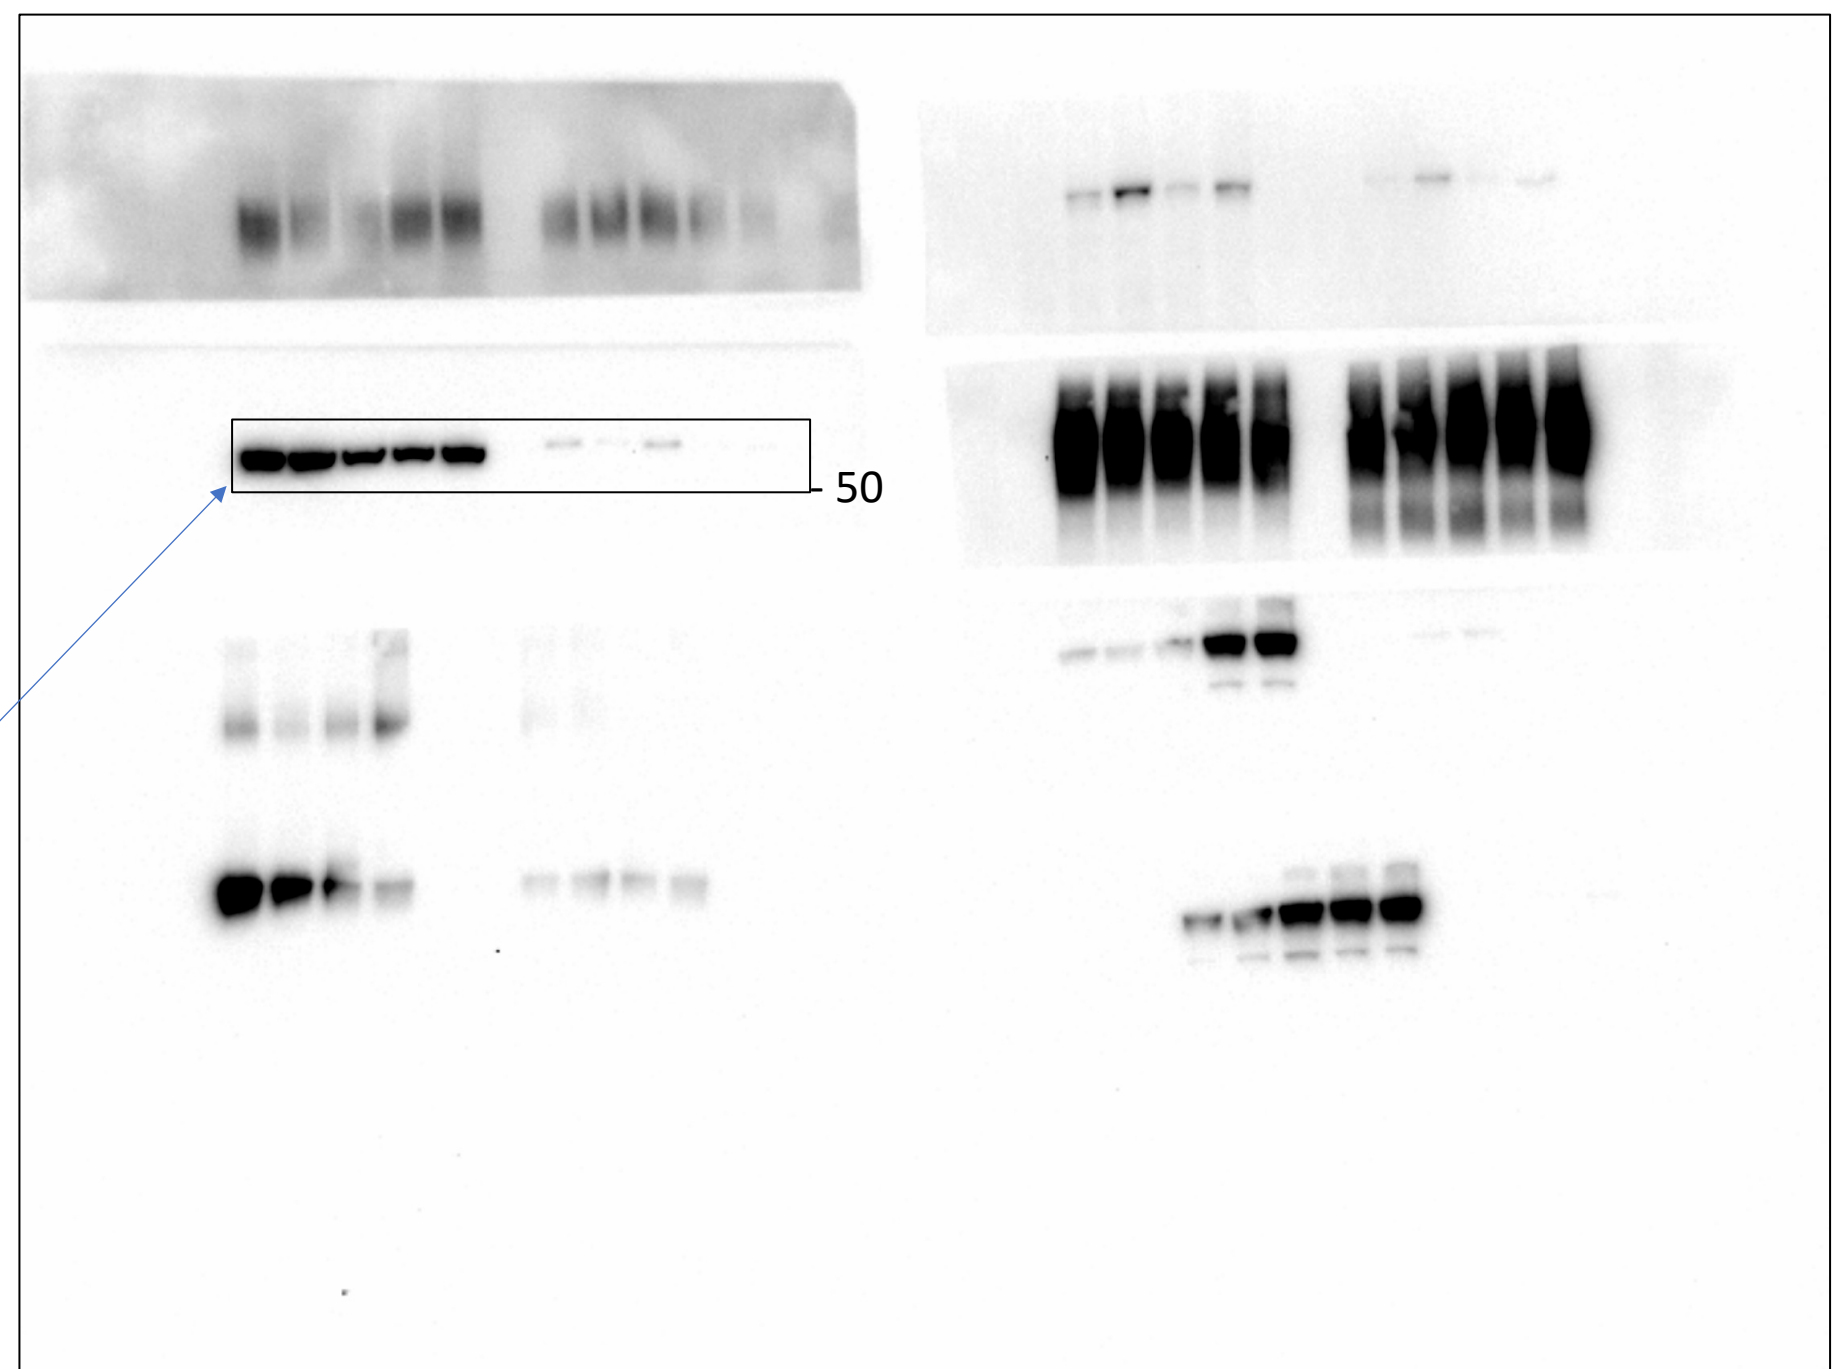

# Figure 3F

## Part 7

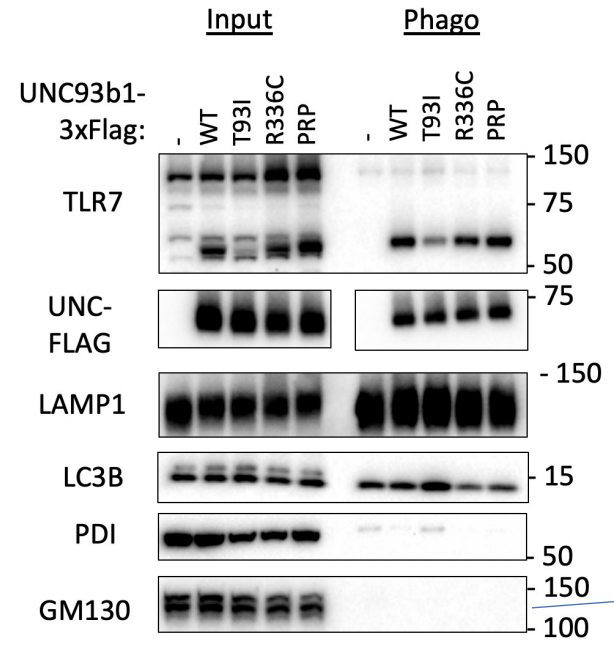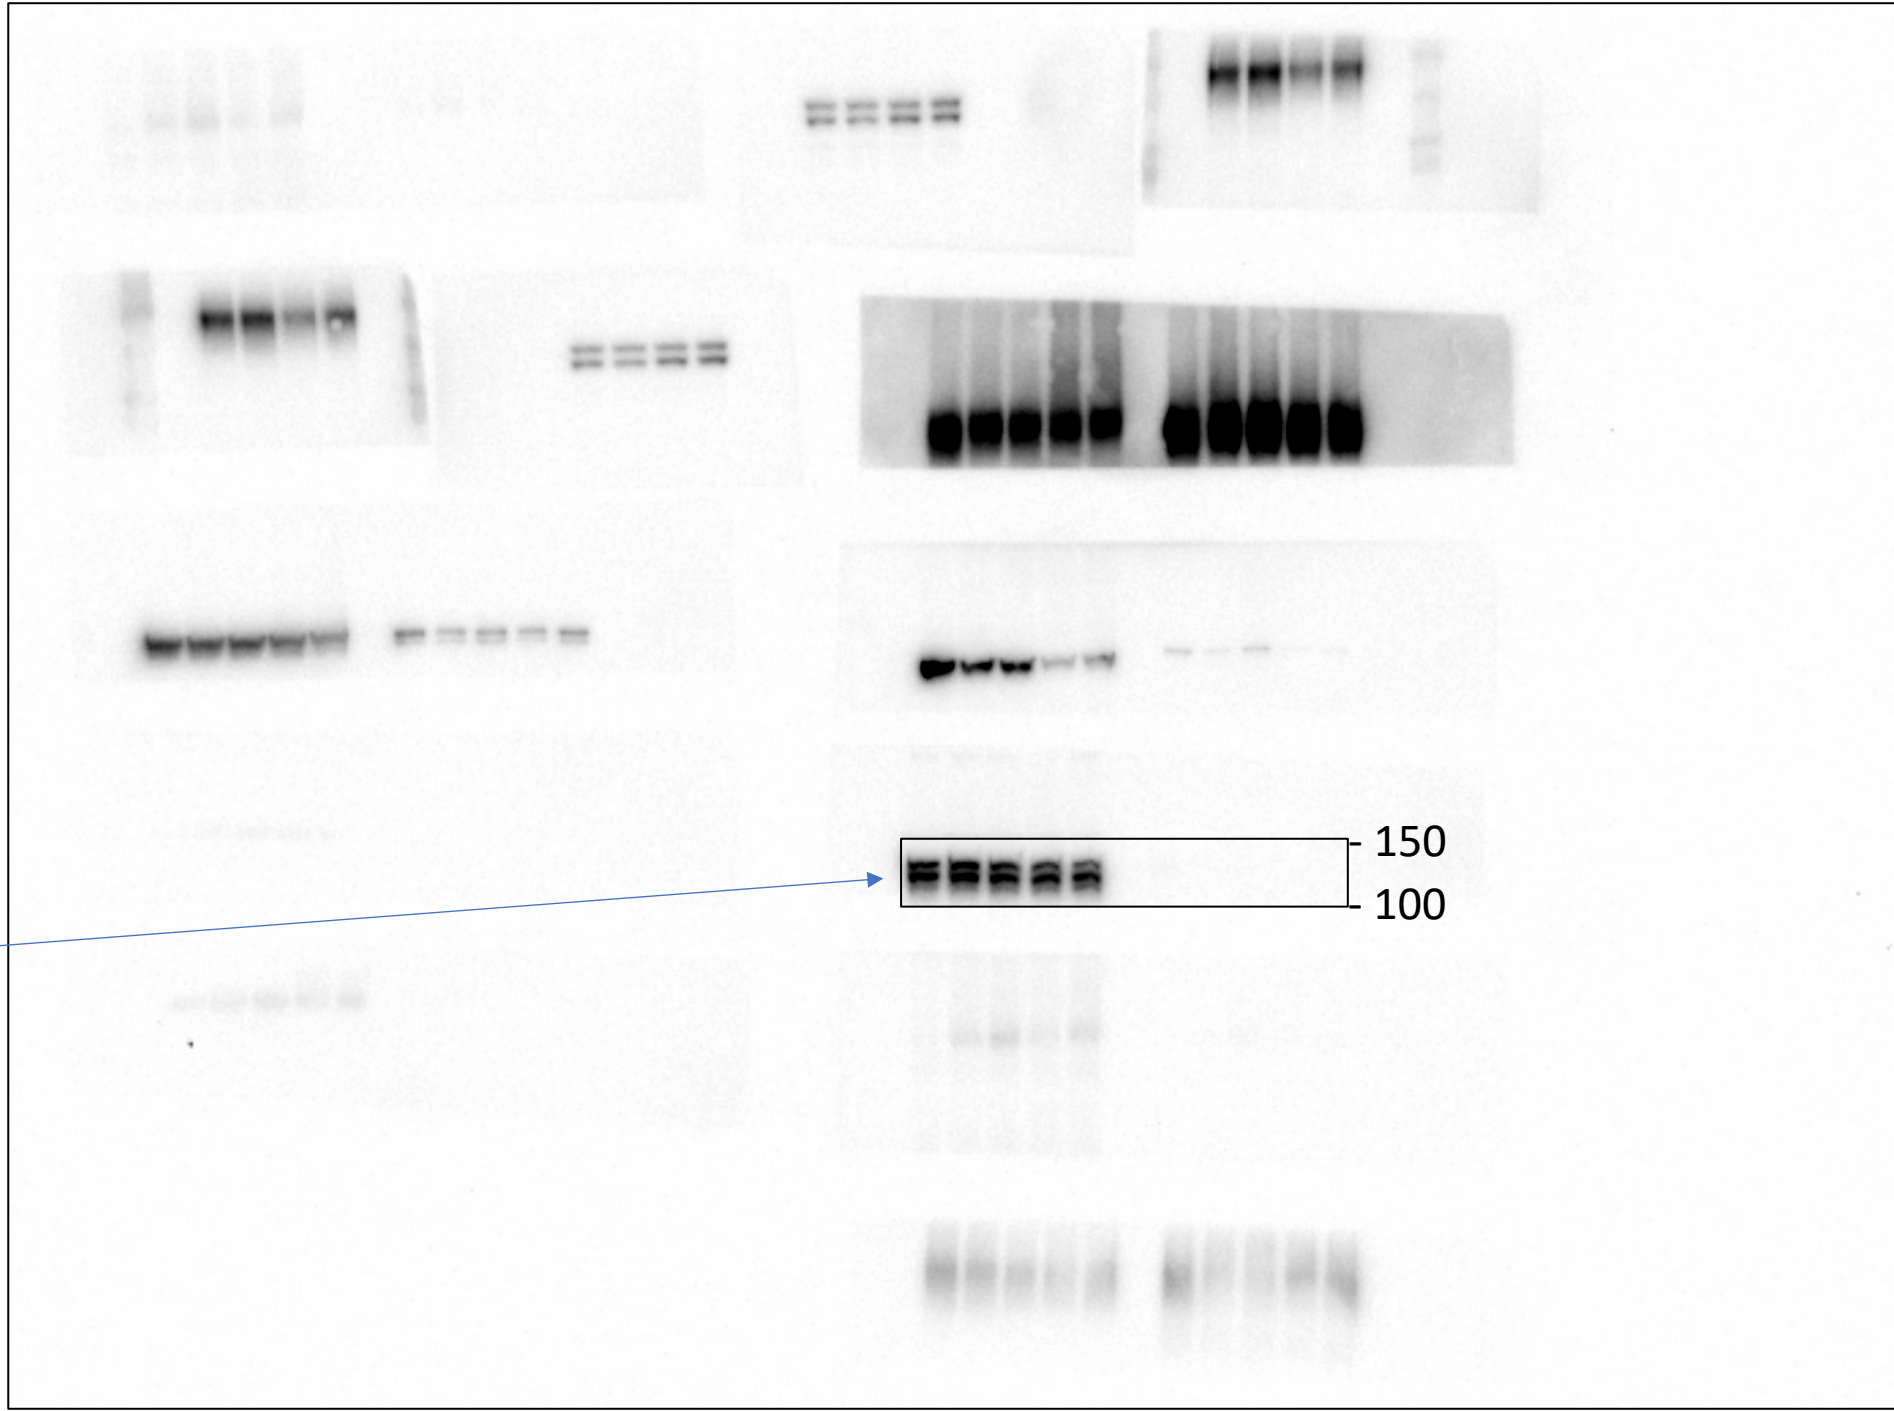

Supplement: JEM_20232005_SourceDataF3.pdf [file JEM_20232005_SourceDataF3.pdf]
