# Supplementary material for: Large-scale mutational analysis identifies UNC93B1 variants that drive TLR-mediated autoimmunity in mice and humans
Source: PubMed Central journal article supplement (PMC11116816; doi:10.1084/jem.20232005), 2024-05-23

Figure 2G

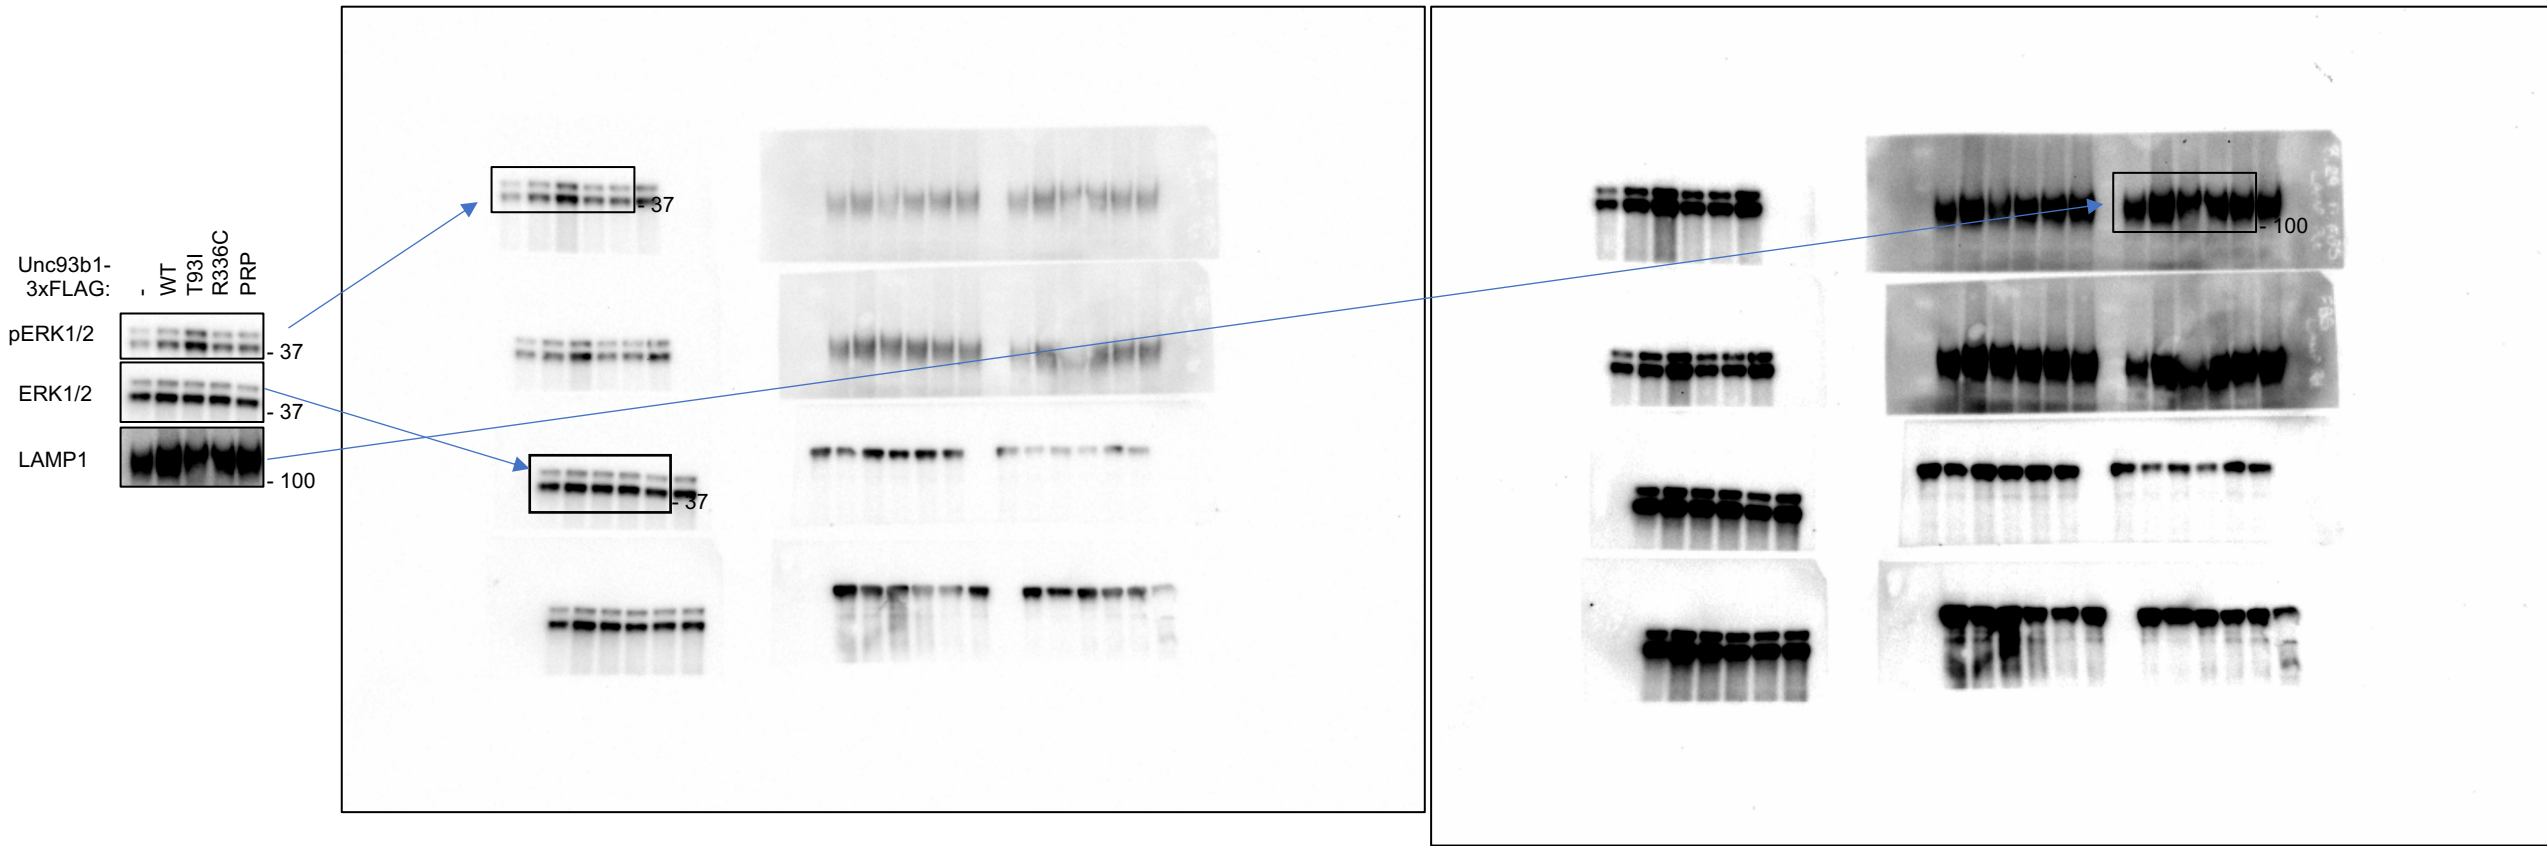

Supplement: JEM_20232005_SourceDataF2.pdf [file JEM_20232005_SourceDataF2.pdf]
