# Supplementary material for: Large-scale mutational analysis identifies UNC93B1 variants that drive TLR-mediated autoimmunity in mice and humans
Source: PubMed Central journal article supplement (PMC11116816; doi:10.1084/jem.20232005), 2024-05-23

**Figure S1C**

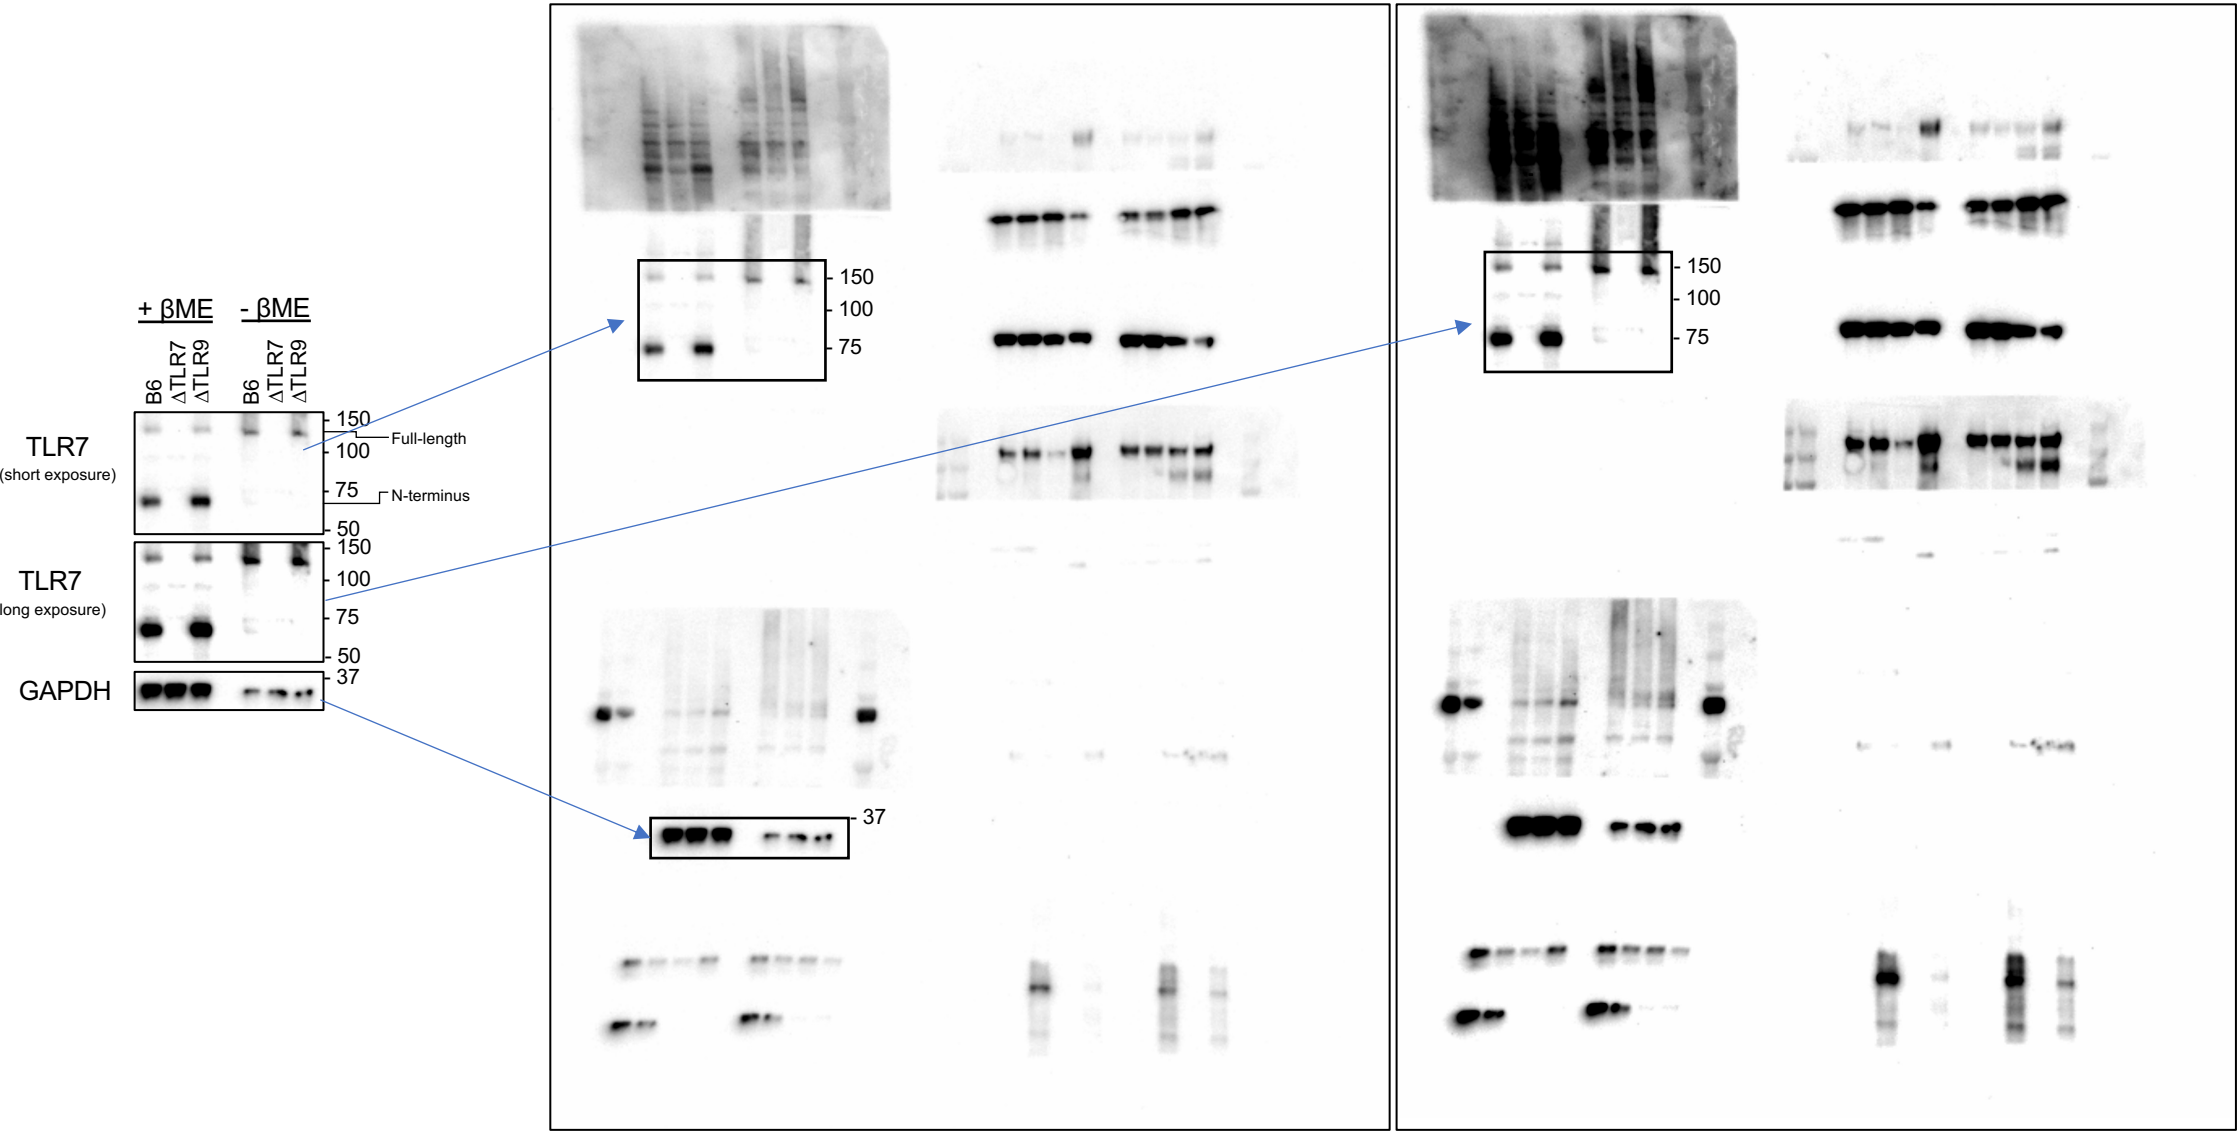

# Figure S1D

## Part 1

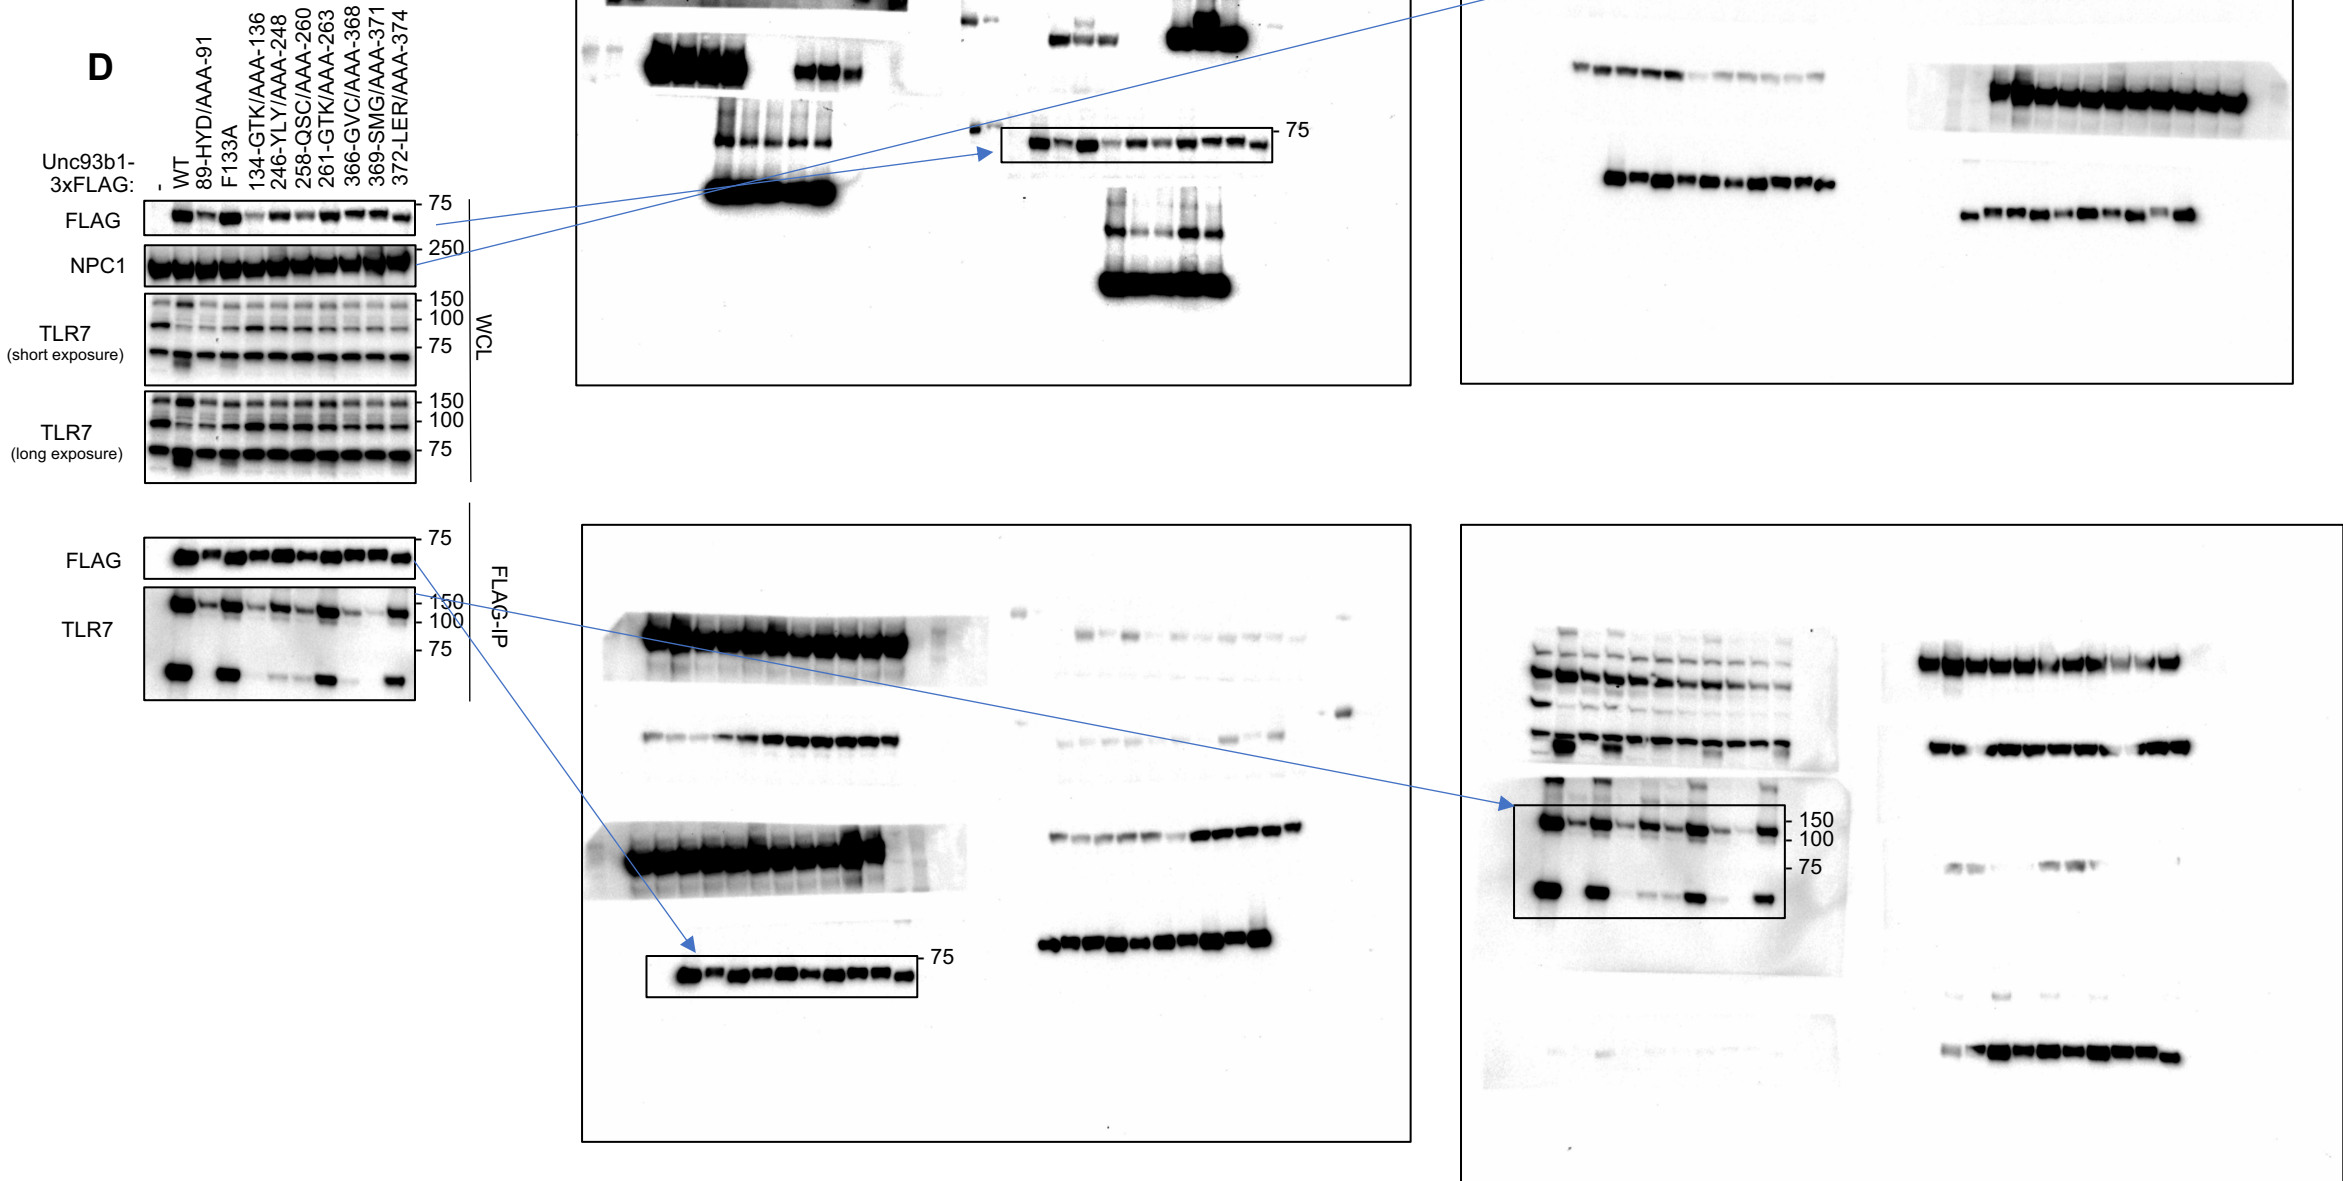

# Figure S1D

## Part 2

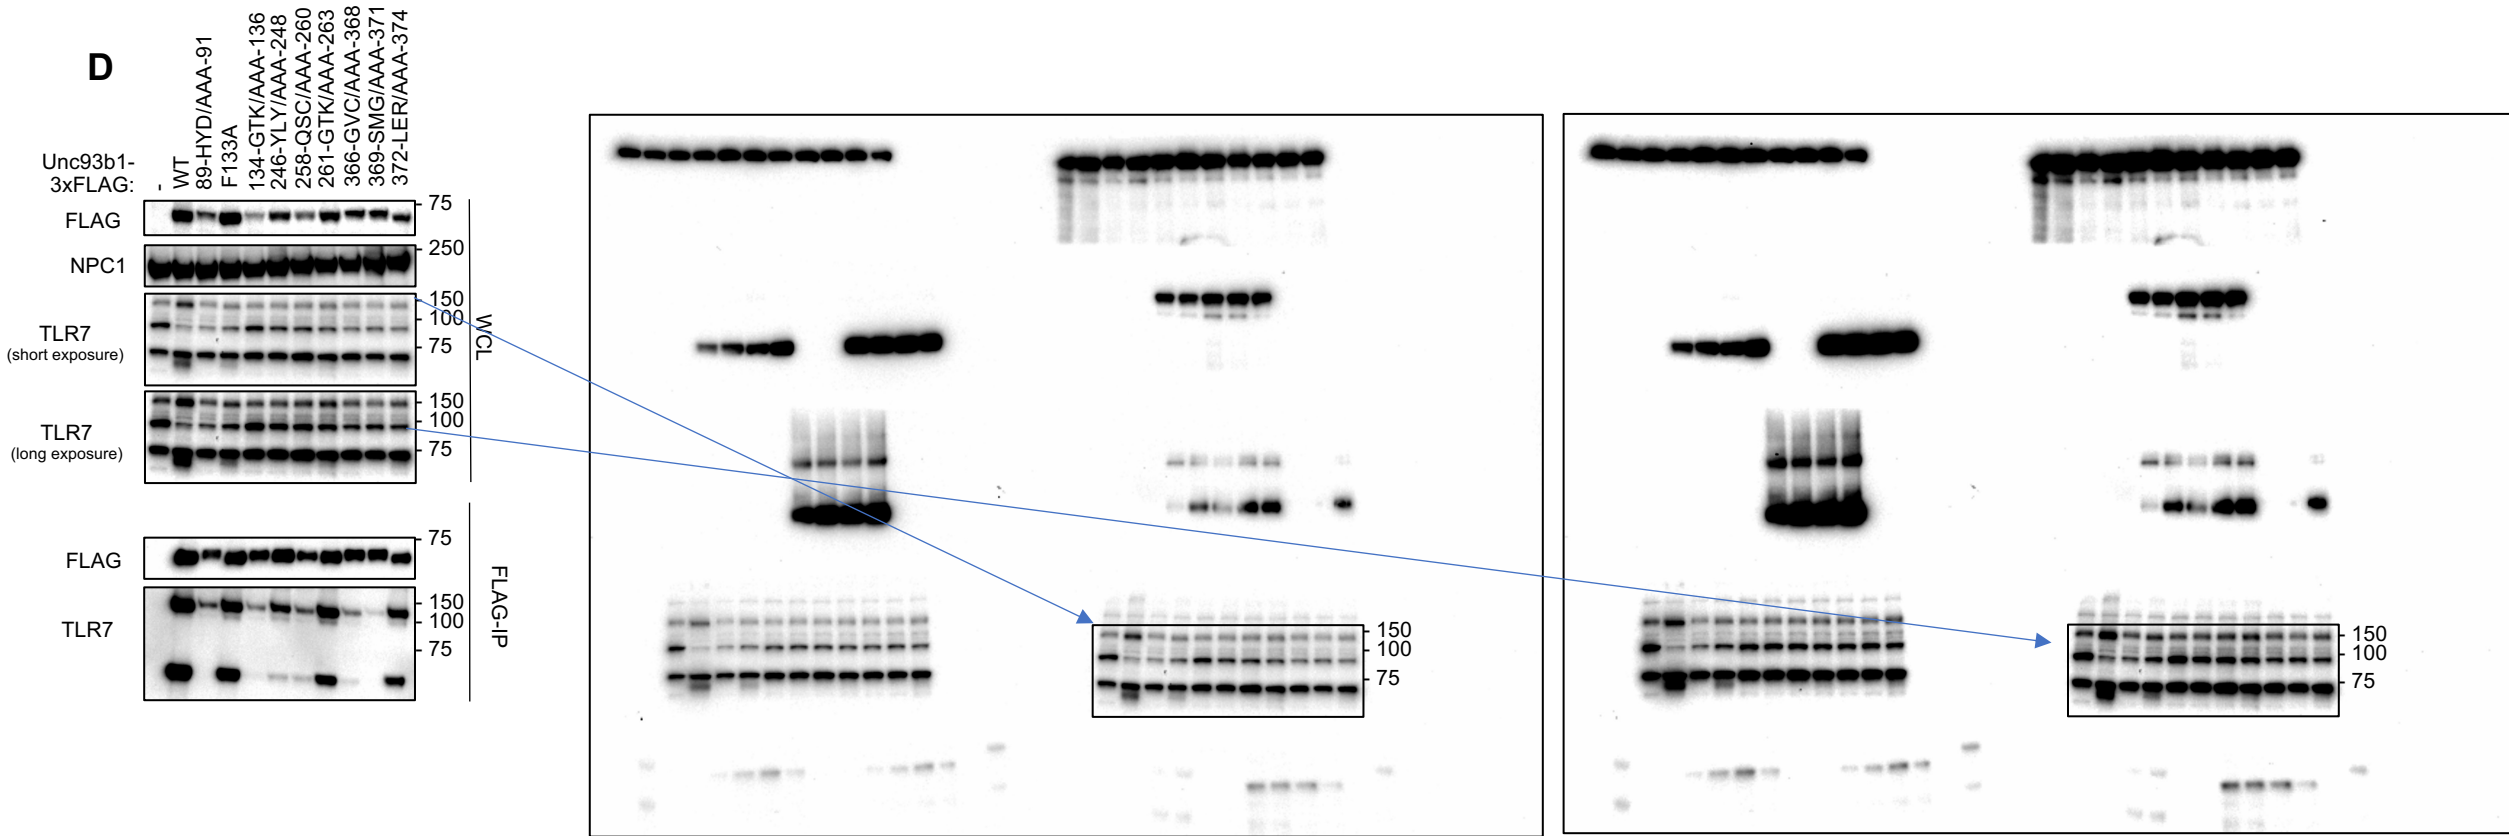

**Figure S1F**  
**Part 1**

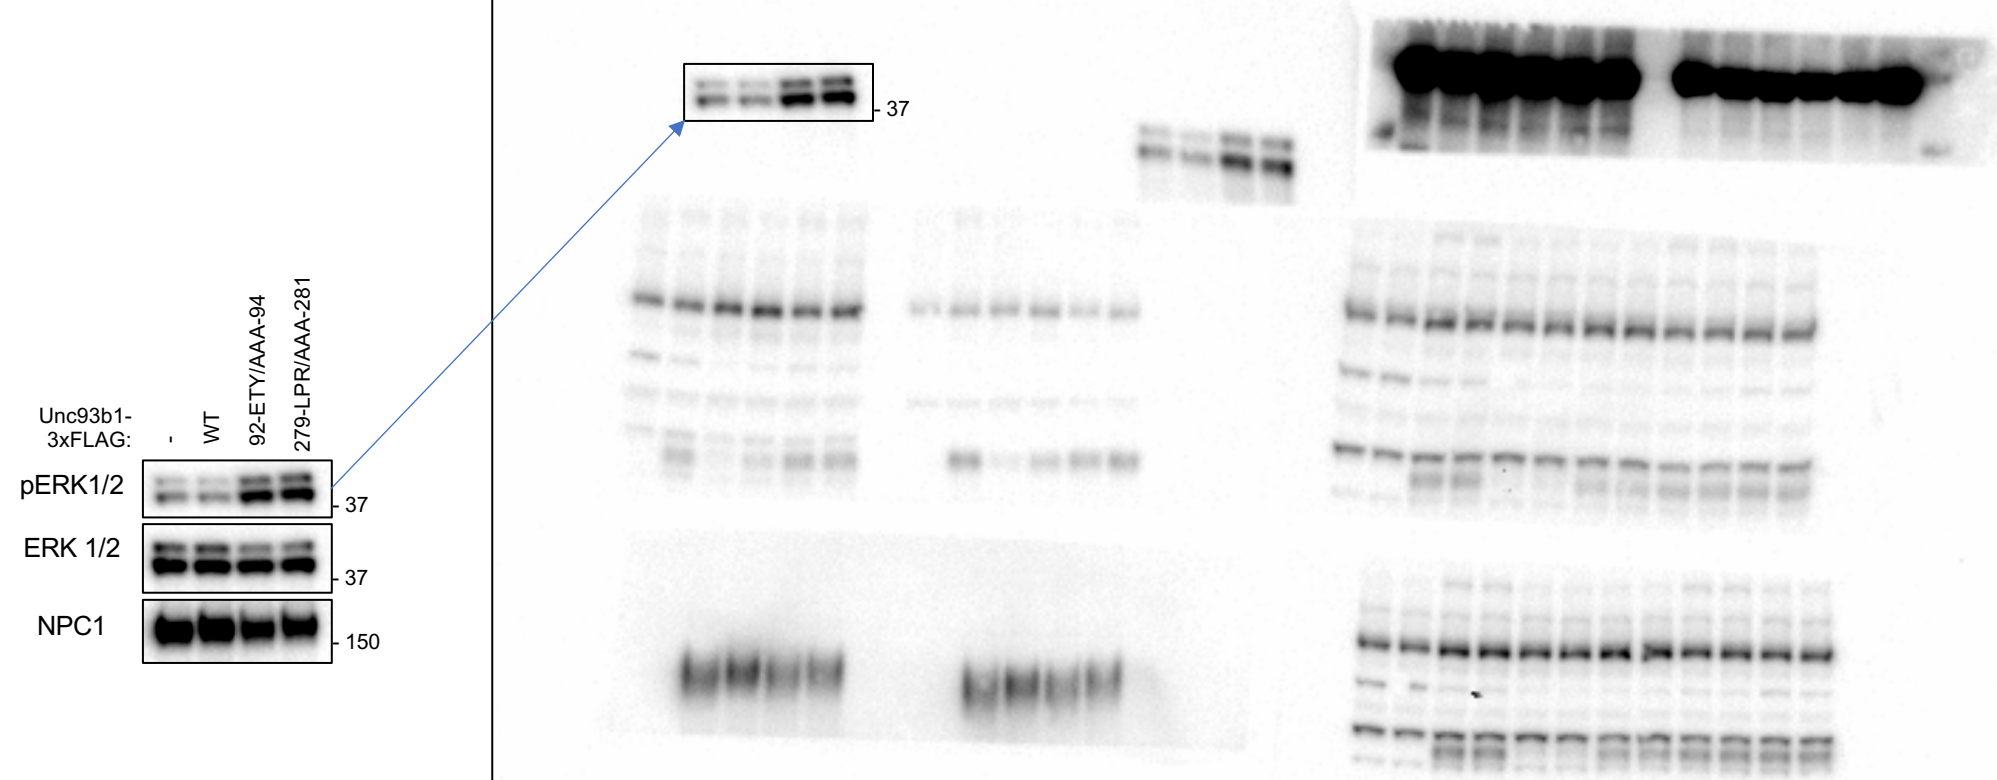

**Figure S1F**  
**Part 2**

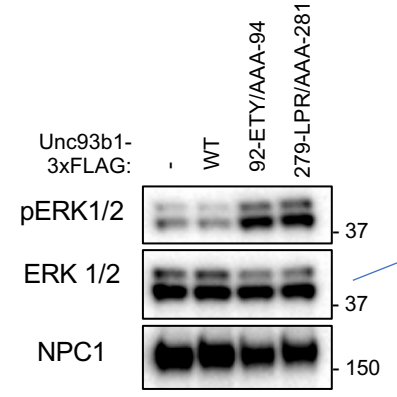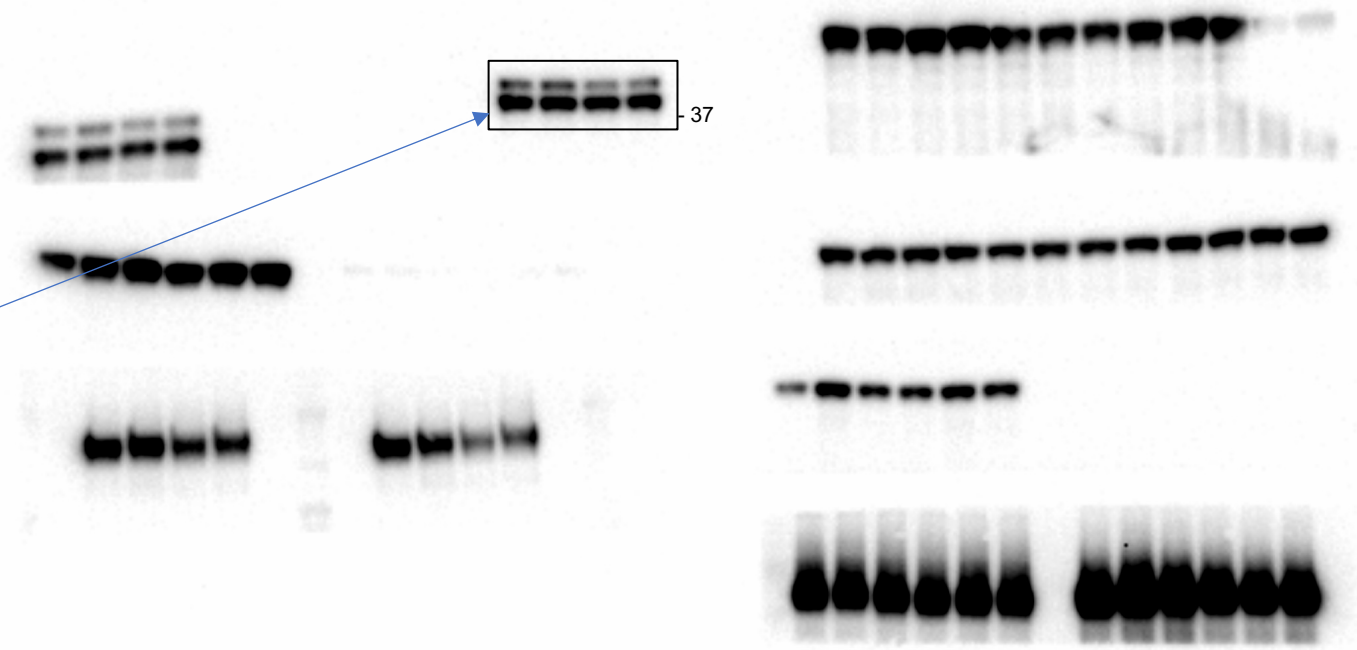

**Figure S1F**  
**Part 3**

Unc93b1-3xFLAG:     WT     92-ETY/AAA-94     279-LPR/AAA-281

pERK1/2     37

ERK 1/2     37

NPC1     150

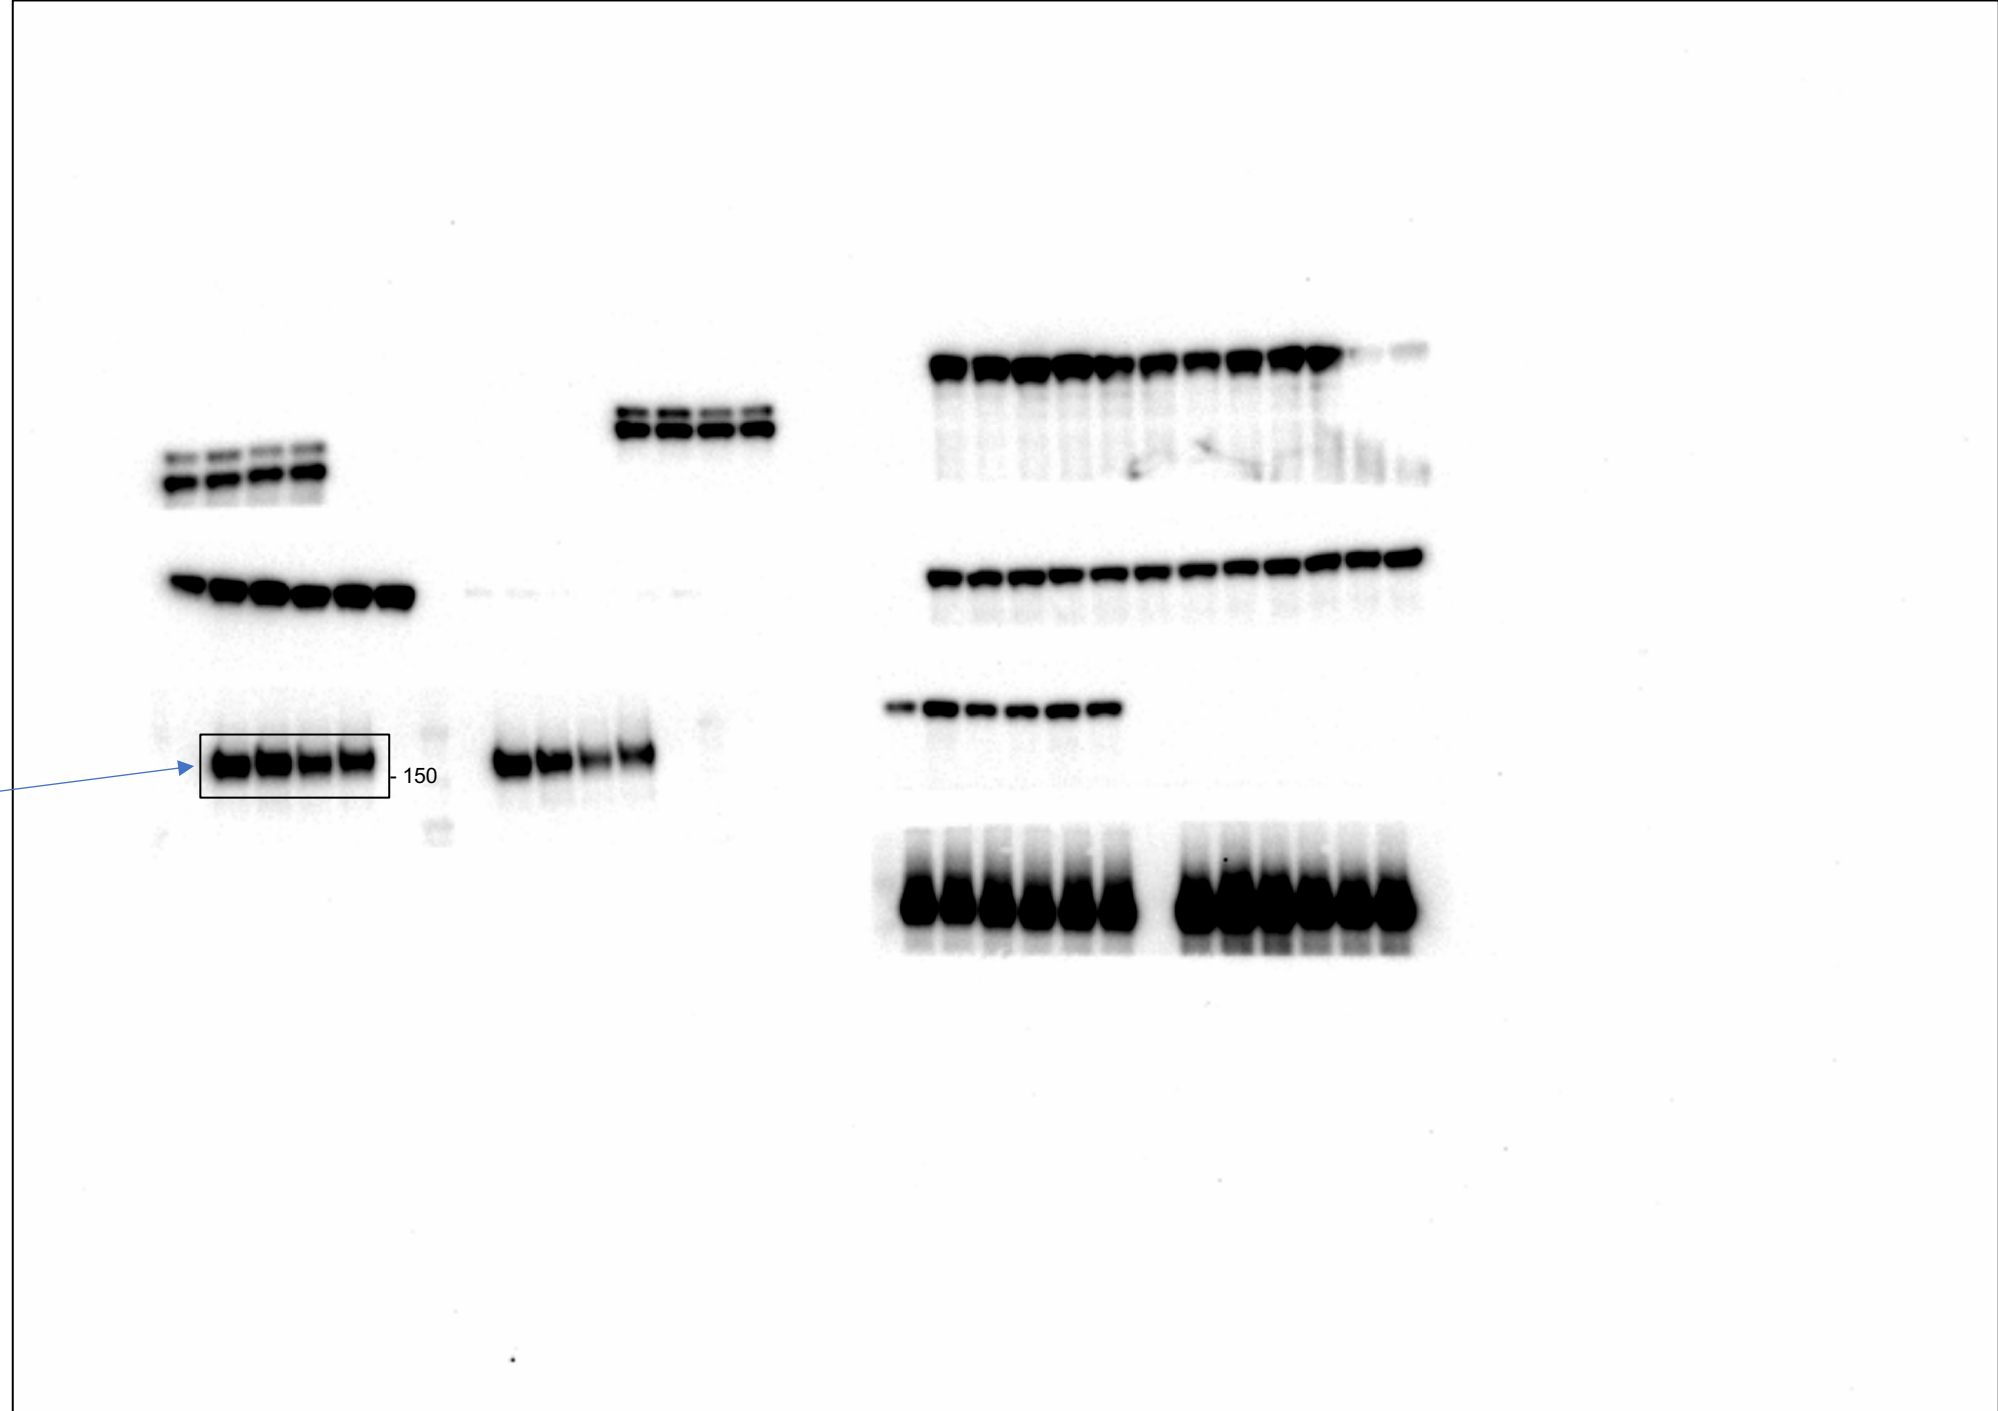

Supplement: JEM_20232005_SourceDataFS1.pdf [file JEM_20232005_SourceDataFS1.pdf]
