# Supplementary material for: Large-scale mutational analysis identifies UNC93B1 variants that drive TLR-mediated autoimmunity in mice and humans
Source: PubMed Central journal article supplement (PMC11116816; doi:10.1084/jem.20232005), 2024-05-23

Figure S3A

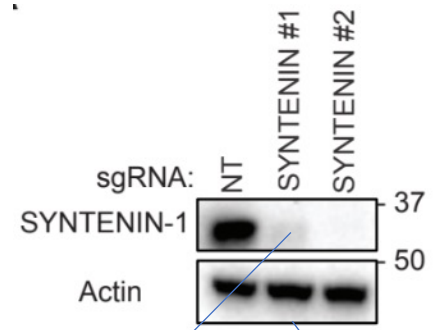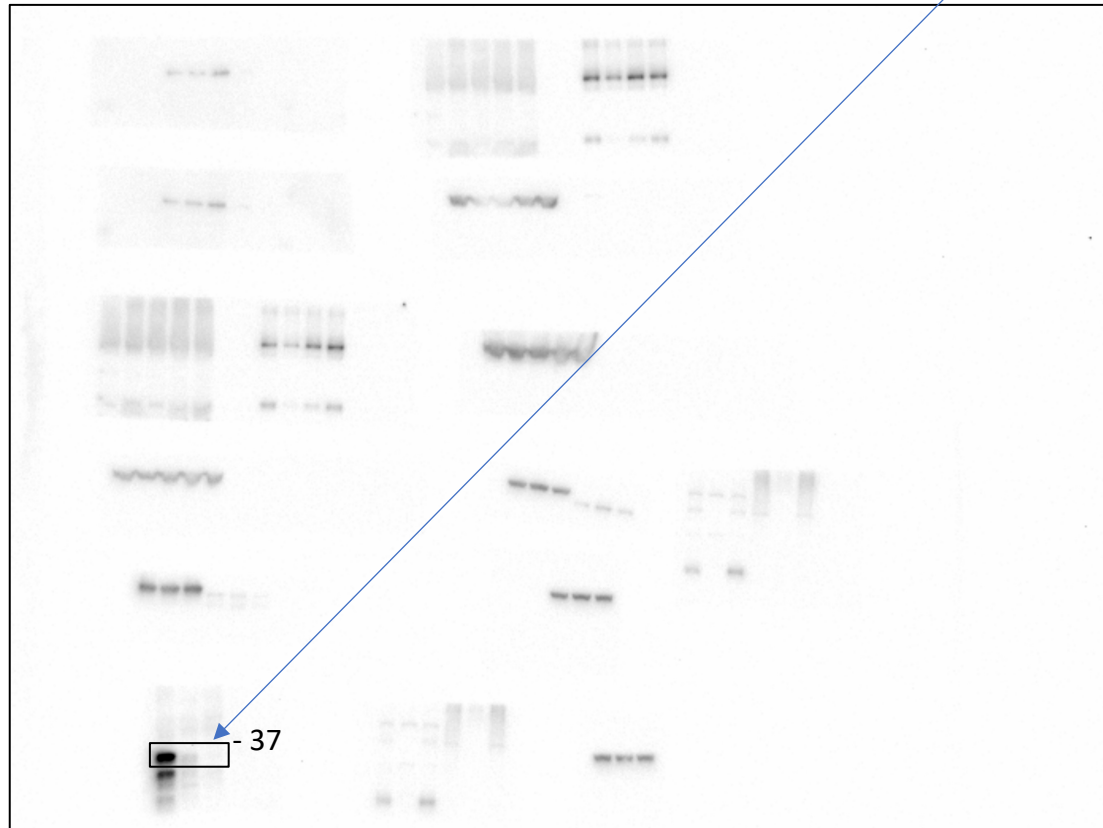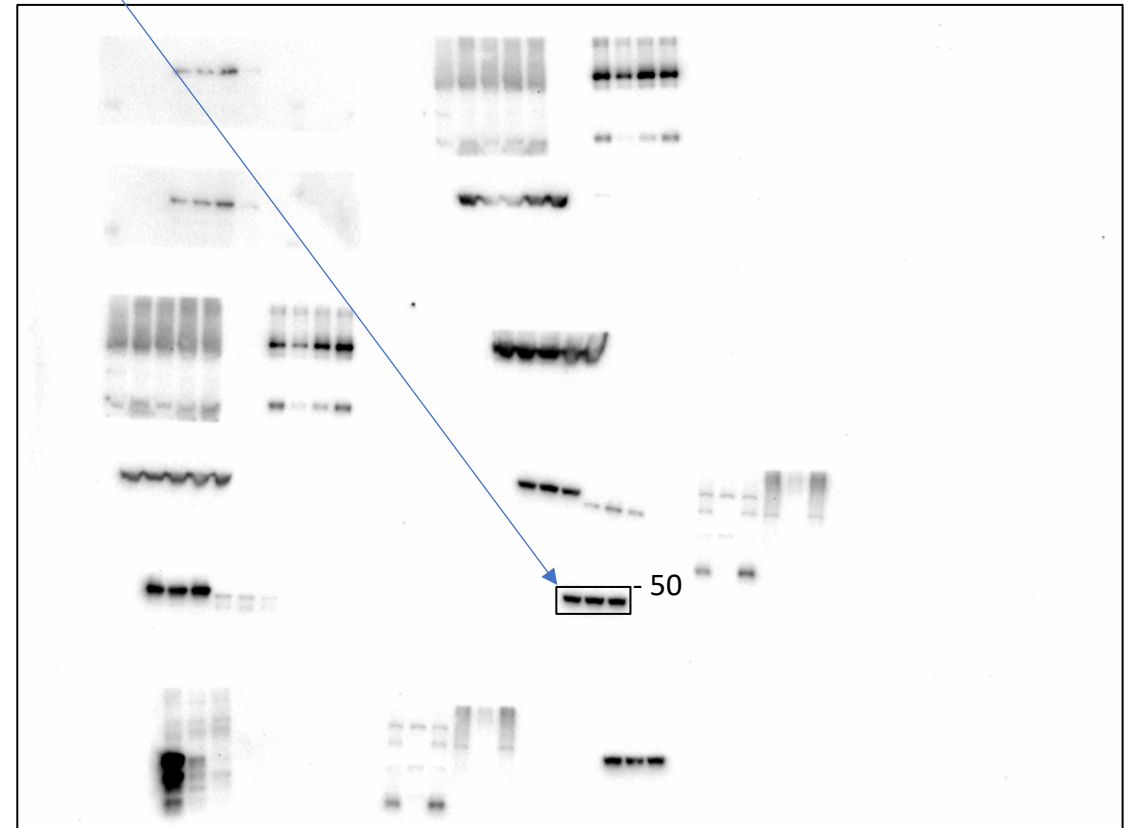

# Figure S3B

## Part 1

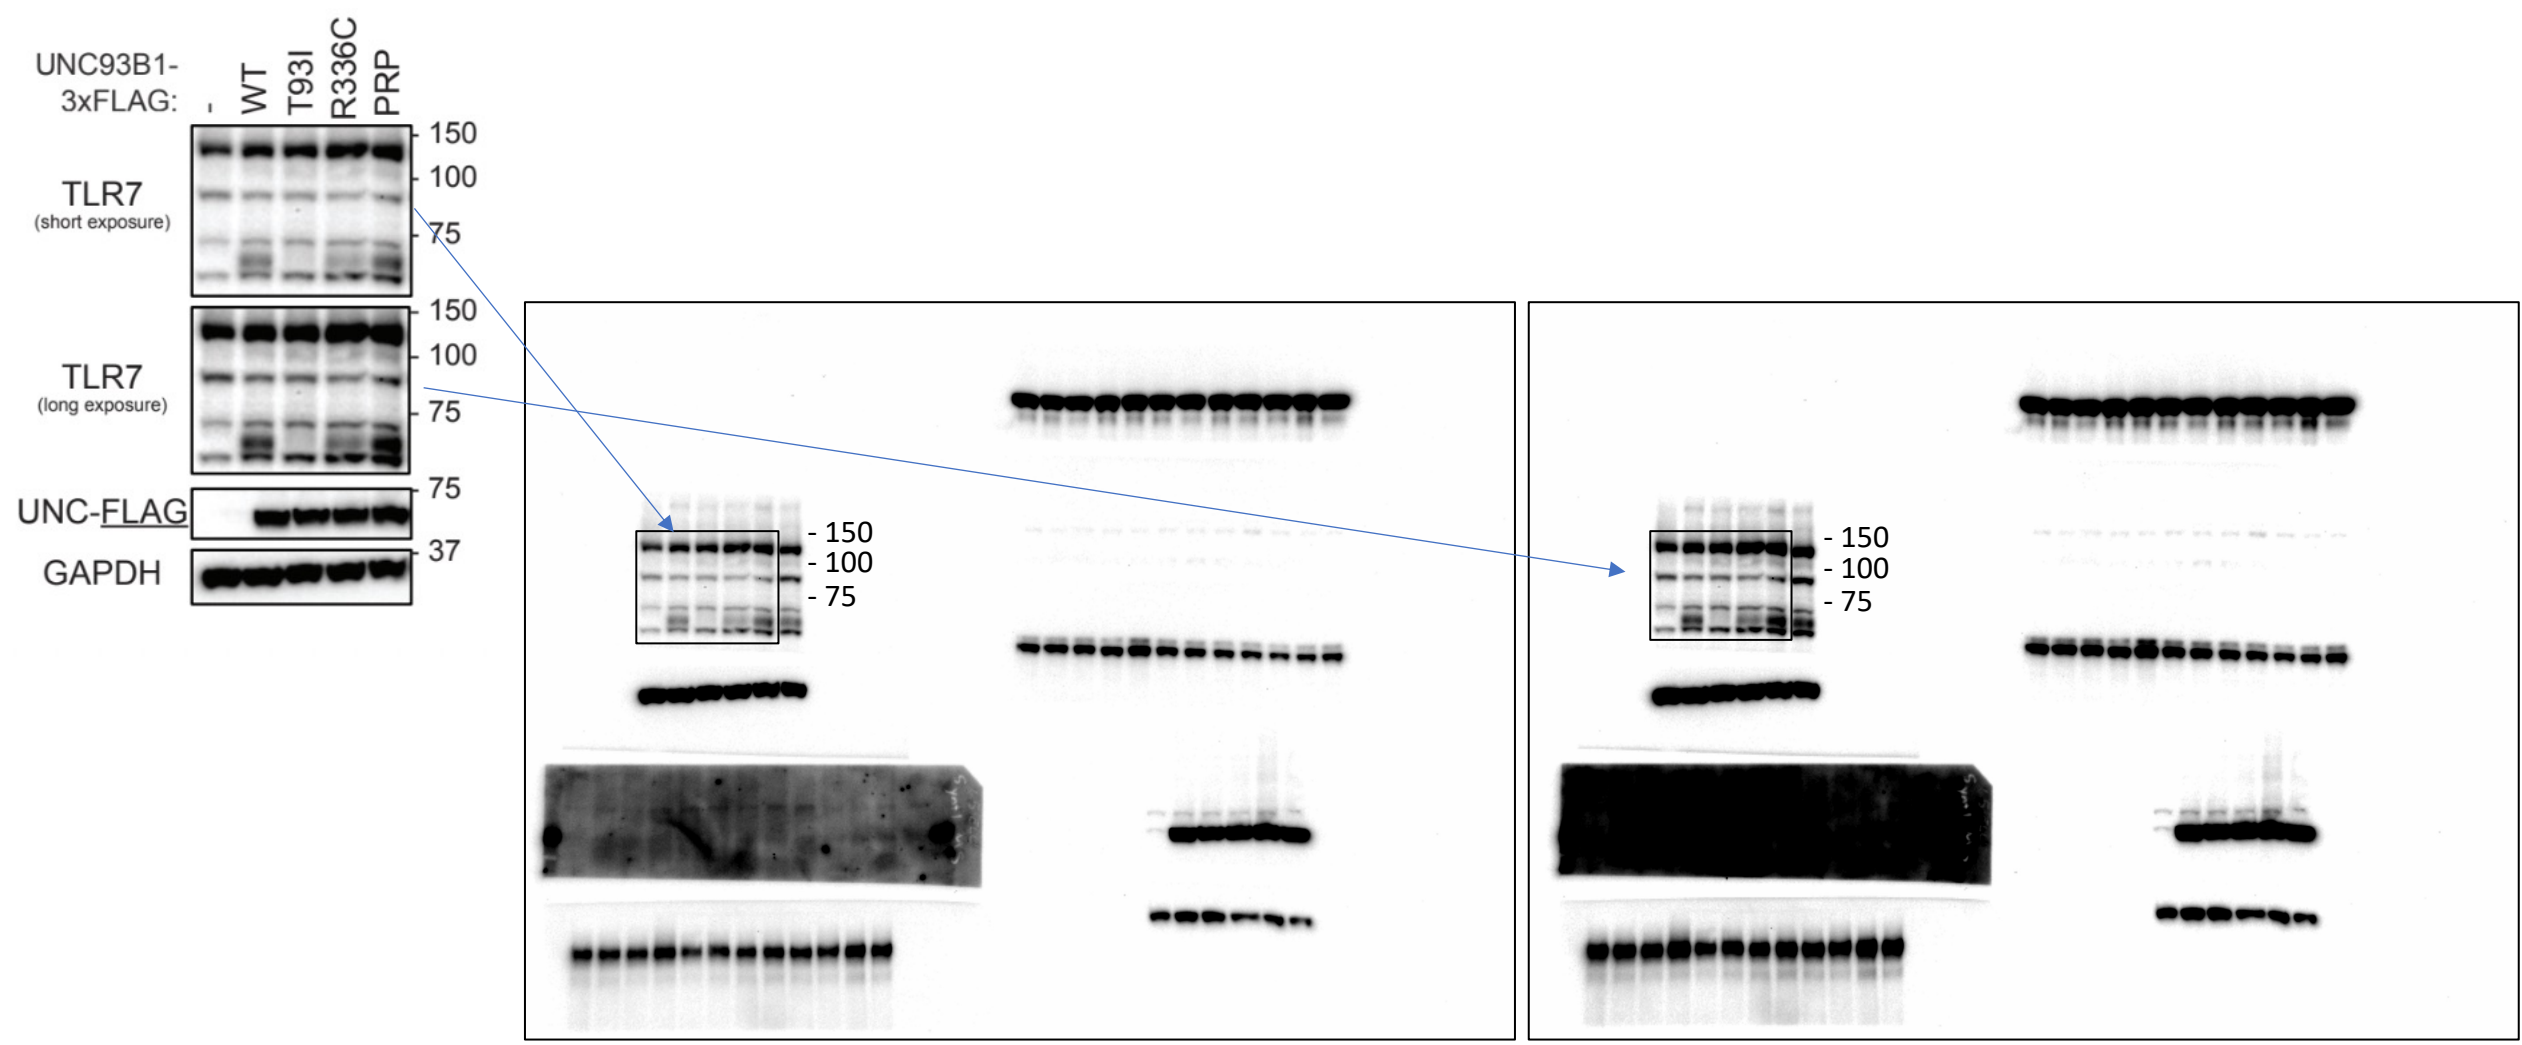

# Figure S3B

## Part 2

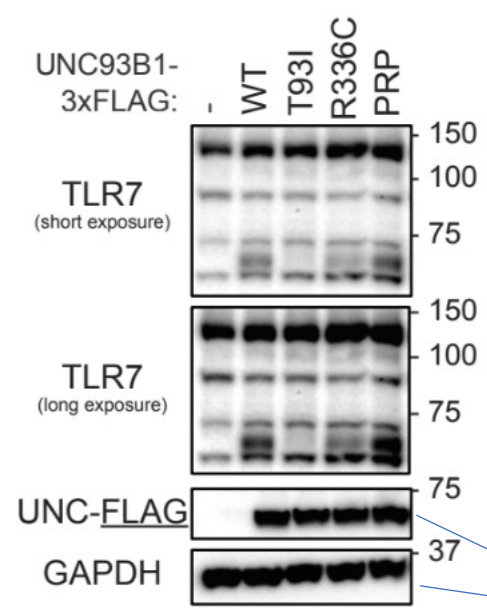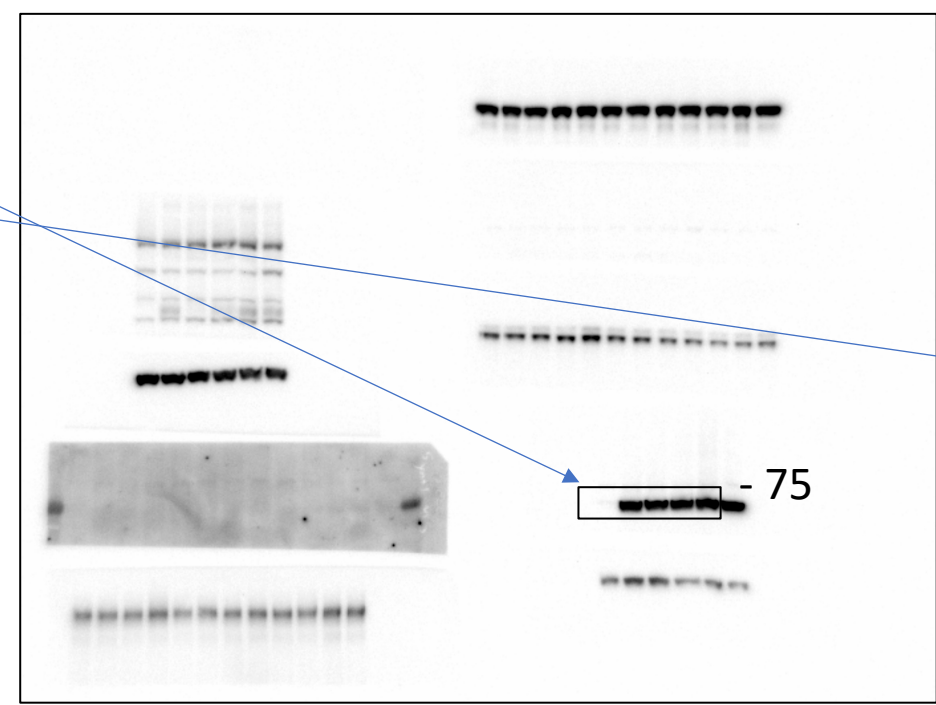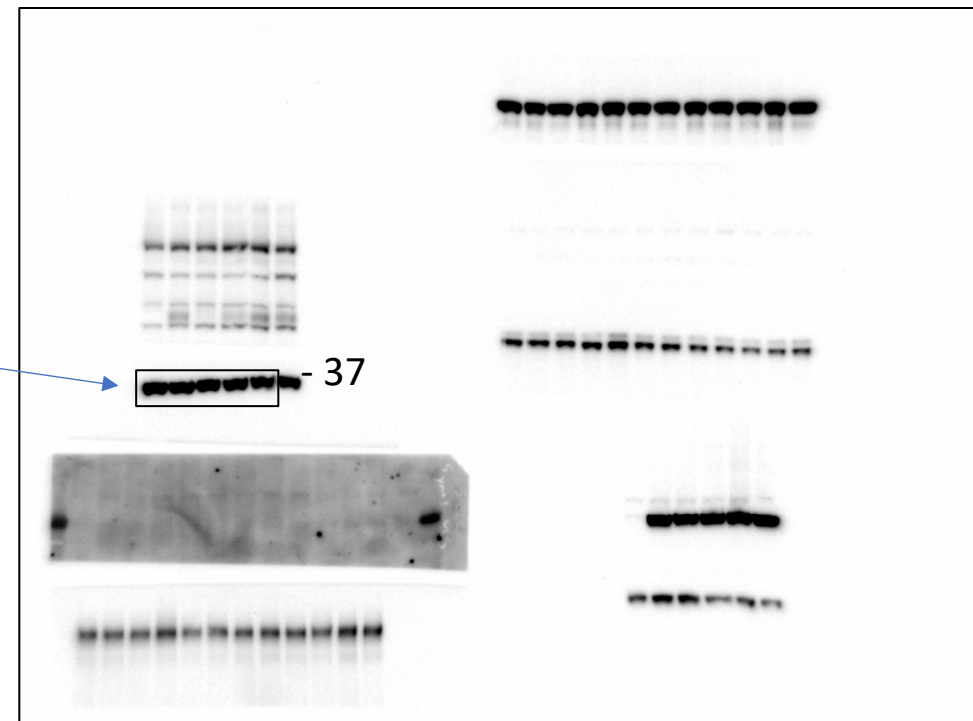

# Figure S3C

## Part 1

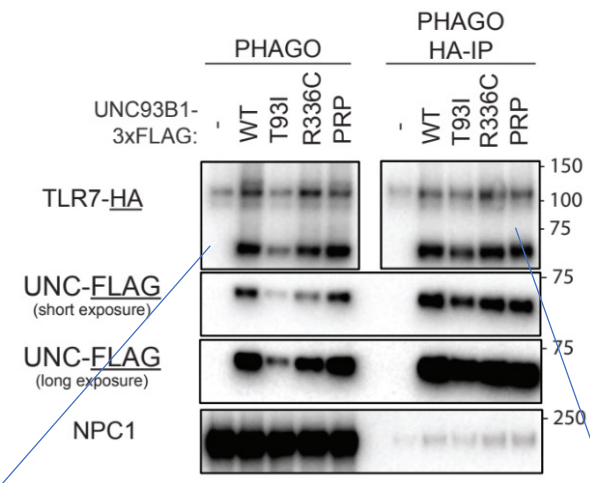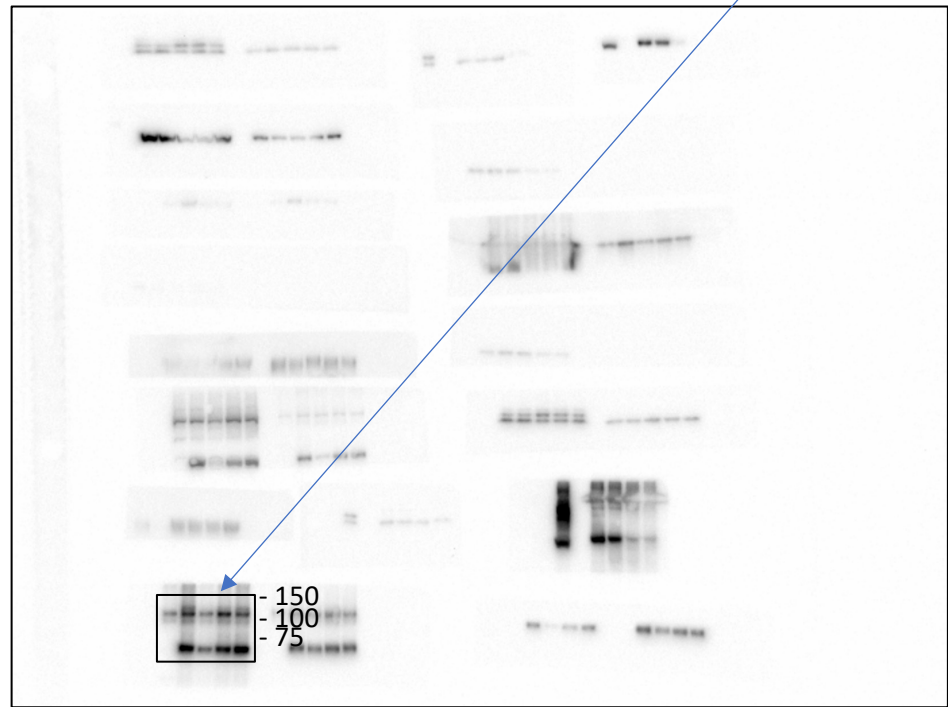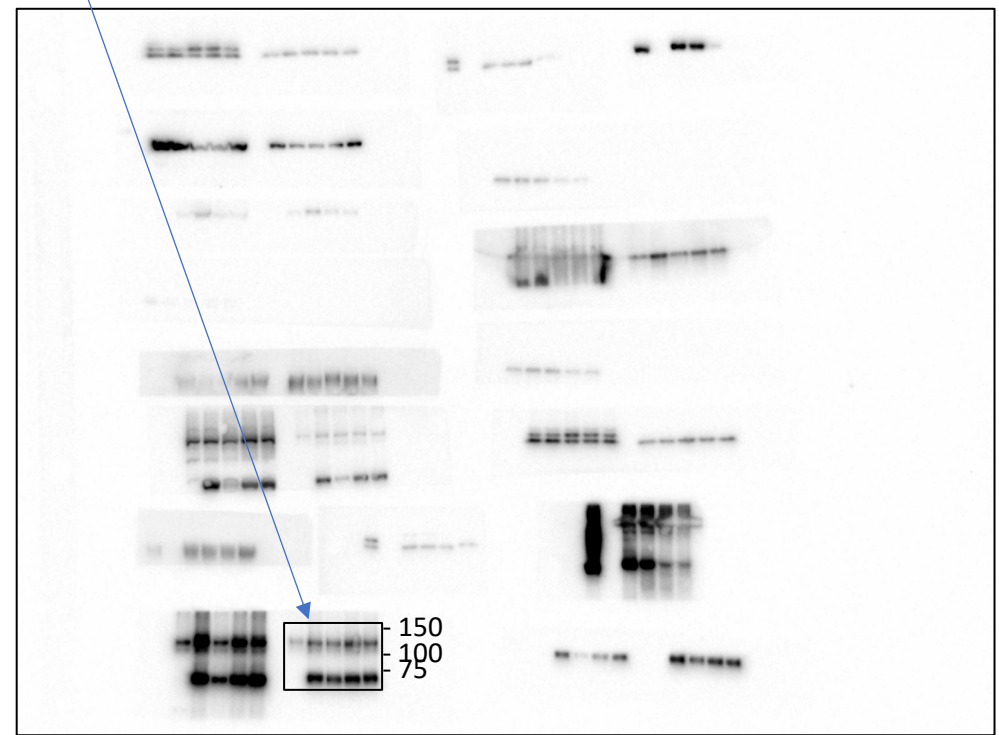

# Figure S3C

## Part 2

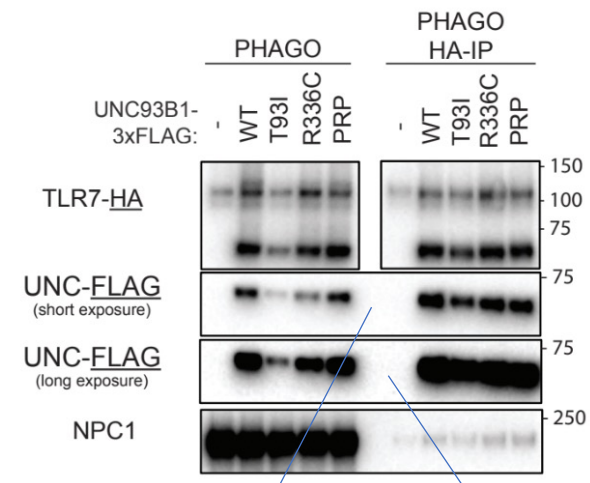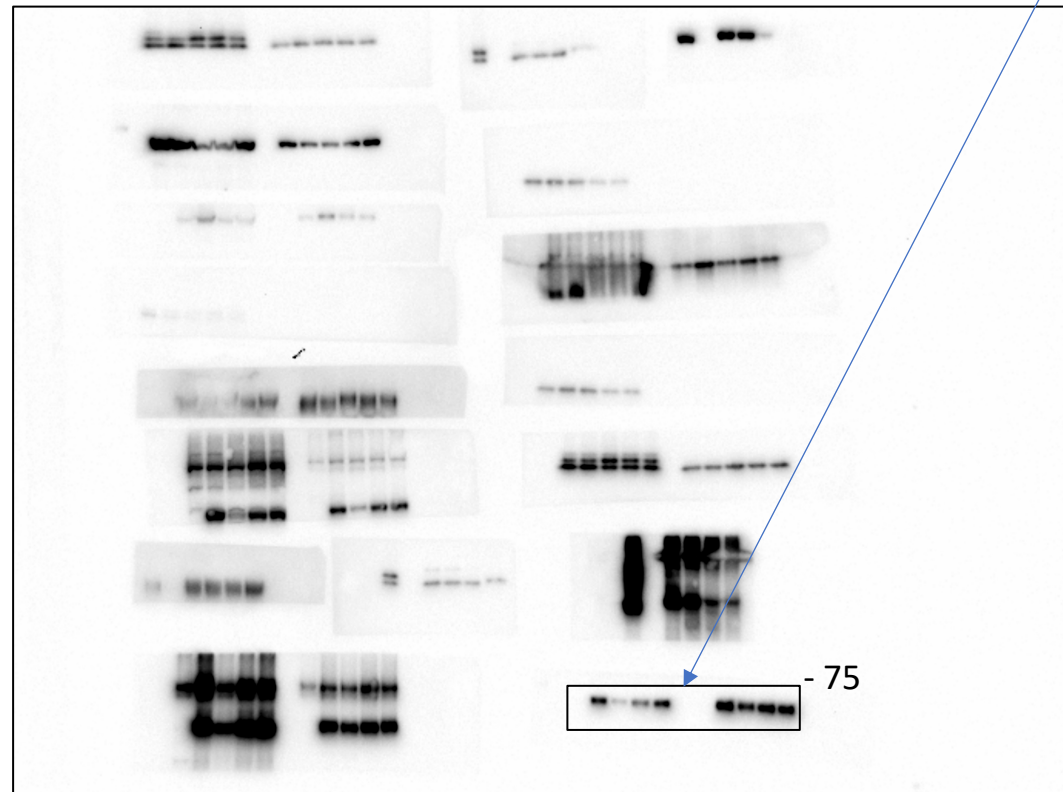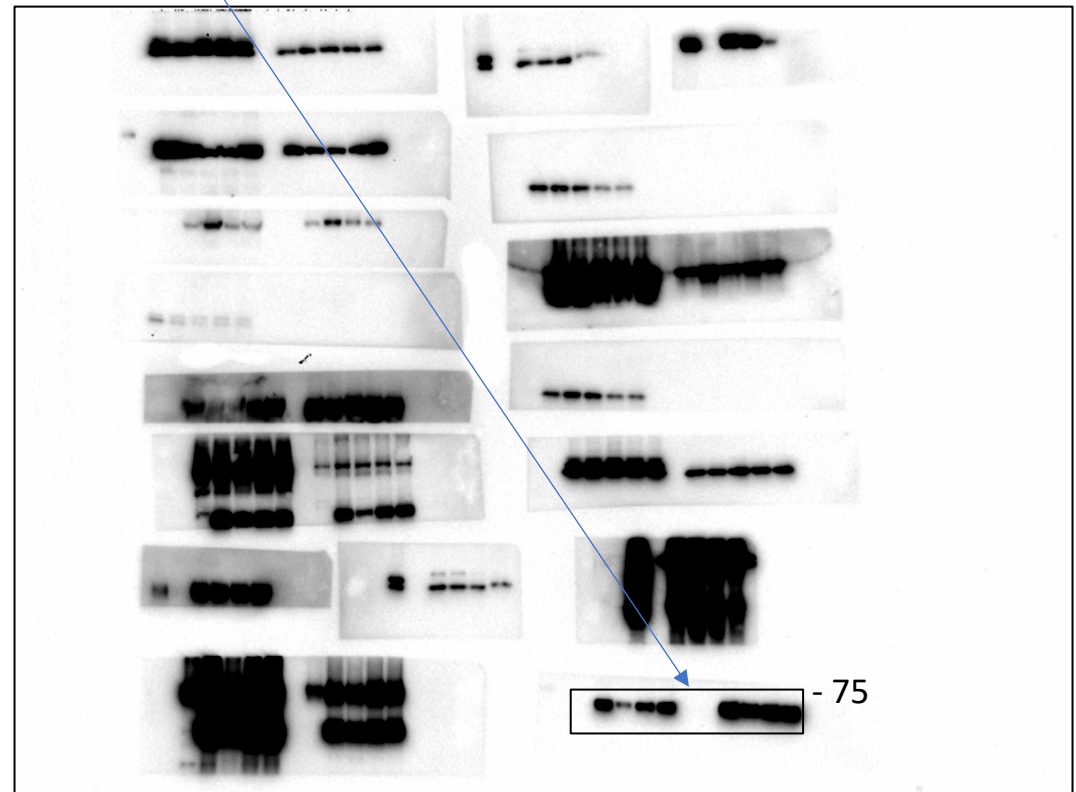



# Figure S3C

## Part 3

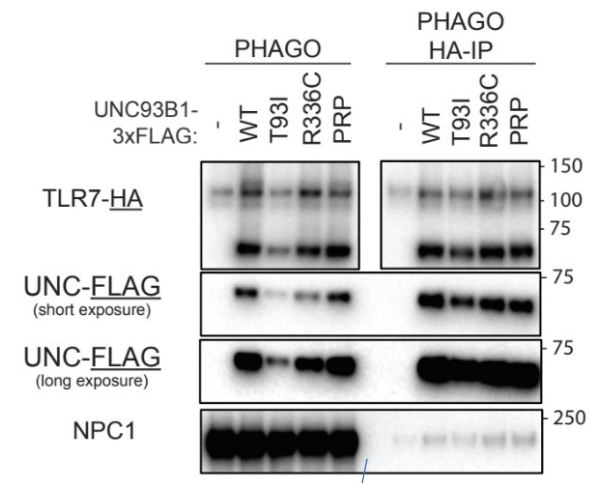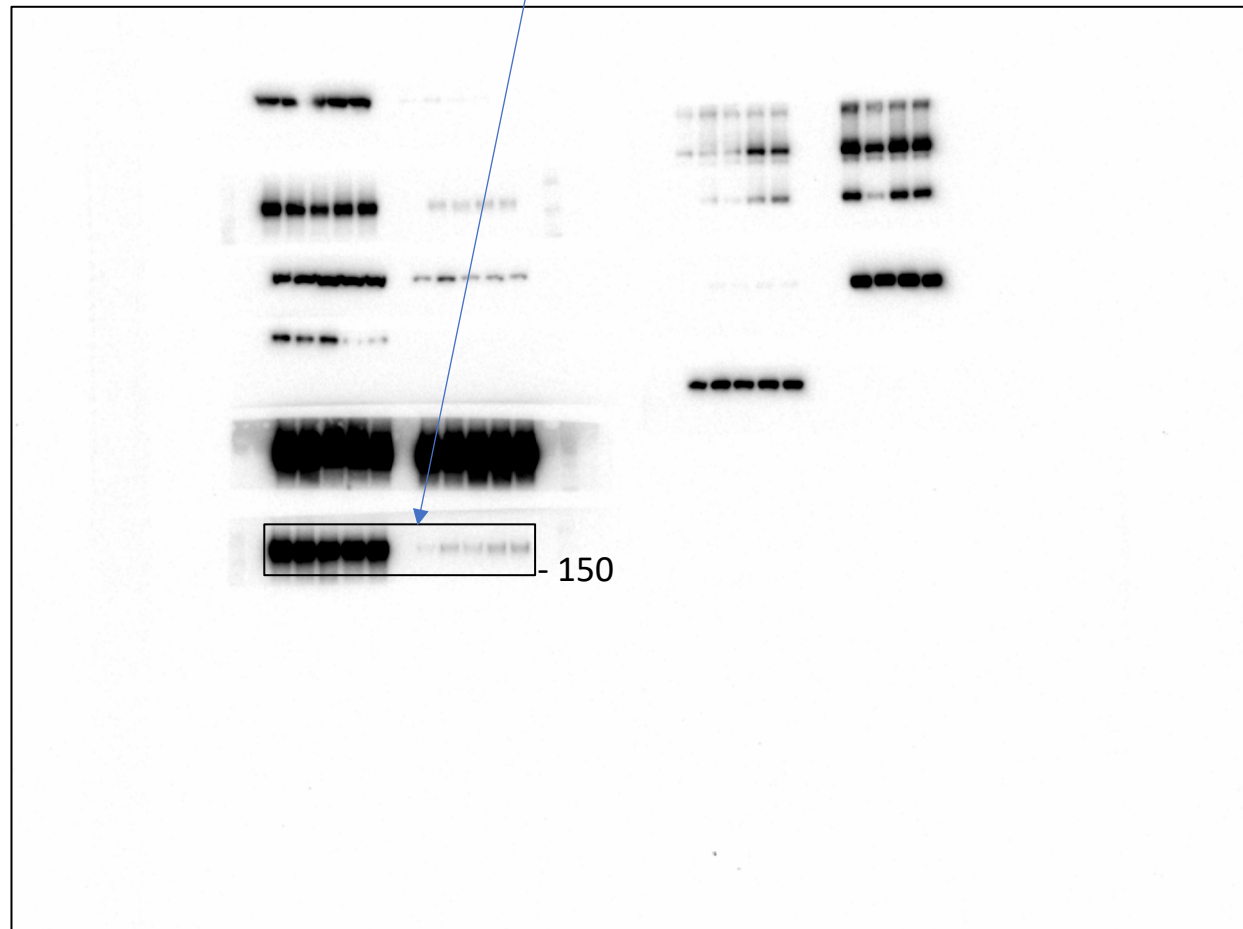

Supplement: JEM_20232005_SourceDataFS3.pdf [file JEM_20232005_SourceDataFS3.pdf]
